# Supplementary material for: Urban and Remote cheMistry modELLing with the new chemical mechanism URMELL: part I gas-phase mechanism development
Source: Royal Society of Chemistry journal article supplement (doi:10.1039/d3ea00094j), 2024-01-01
Supplement: d3ea00094j1.pdf [file d3ea00094j1.pdf]

## Supplementary materials

### Urban and Remote cheMistry modELLing with the new chemical mechanism

#### URMELL: Part I gas-phase mechanism development

M. L. Luttkus<sup>\*a</sup>, E. H. Hoffmann<sup>b</sup>, A. Tilgner<sup>b</sup>, R. Wolke<sup>a</sup>, H. Herrmann<sup>b</sup>, I. Tegen<sup>a</sup>

<sup>a</sup> Department Modelling of Atmospheric Processes, Leibniz Institute for Tropospheric Research (TROPOS), Leipzig, Germany

<sup>b</sup> Atmospheric Chemistry Department, Leibniz Institute for Tropospheric Research (TROPOS), Leipzig, Germany

\* Correspondence: luttkus@tropos.de

#### Supplement S1 – Gas-phase chemical mechanism URMELL

The chemical mechanism URMELL contains of 313 species (listed in Table S1-1), 733 chemical reactions (listed in Table S1-2) and 183 photolysis reactions (listed in Table S1-3). Table S1-1 contains species name, chemical and structural formula, a short description and the Alias set for the deposition scheme. Table S1-2 lists all chemical reactions, the rate coefficient as well as references and comments. Table S1-3 summarizes all photo-dissociation reactions and photolysis parameters are given in Table S1-4. Images for the chemical structures are e.g. taken from the MCM3.3.1 (<http://mcm.york.ac.uk/home.htm>), Wennberg *et al.*<sup>1</sup>, Vereecken *et al.*<sup>2</sup> or are created using GECKO-A (<http://geckoa.lisa.u-pec.fr/index.php>).

**Table S1-1:** List of 308 species used in URMELL chemistry mechanism including chemical & structural formula, description and assigned Alias for deposition scheme (new species bold).

| URMELL species | Chemical formula | Structural formula                                                                  | Description                                              | Alias for depos. |
|----------------|------------------|-------------------------------------------------------------------------------------|----------------------------------------------------------|------------------|
| ACBZO2         | C7H5O3           | 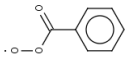 | Acylperoxy radical from benzaldehyde                     | RO2              |
| <b>ACBZOOH</b> | C7H6O3           |  | Perbenzoic acid                                          | PAA              |
| ALKNO3         | C5H11NO3         |  | Alkyl nitrates from BIGALK oxidation (shown is SC4H9NO3) | ORA              |
| ALKO2          | C5H11O2          |  | Peroxy radicals from BIGALK (shown is SC4H9O2)           | RO2              |
| ALKOH          | C5H12            |  | Lumped alcohol from BIGALK (shown is BUT2OL)             |                  |

|                    |                                                 |                                                                                     |                                                                                         |                 |
|--------------------|-------------------------------------------------|-------------------------------------------------------------------------------------|-----------------------------------------------------------------------------------------|-----------------|
| ALKOOH             | C <sub>5</sub> H <sub>12</sub> O <sub>2</sub>   |    | Organic hydroperoxides from BIGALK (shown is SC4H9OOH)                                  | OP              |
| APIN               | C <sub>10</sub> H <sub>16</sub>                 |    | $\alpha$ -Pinene                                                                        |                 |
| BCARY              | C <sub>15</sub> H <sub>24</sub>                 |    | $\beta$ -Caryophyllene and other sesquiterpenes                                         |                 |
| BCNO <sub>3</sub>  | C <sub>15</sub> H <sub>25</sub> NO <sub>4</sub> |    | Organonitrate from $\beta$ -caryophyllene OH/O <sub>3</sub> + NO chemistry              | ORA             |
| BCO <sub>2</sub>   | C <sub>15</sub> H <sub>25</sub> O <sub>3</sub>  |    | Peroxy radical from $\beta$ -caryophyllene OH/O <sub>3</sub> chemistry                  | RO <sub>2</sub> |
| BCOO               | C <sub>15</sub> H <sub>24</sub> O <sub>3</sub>  |    | Peroxy radical from $\beta$ -caryophyllene O <sub>3</sub> chemistry                     | RO <sub>2</sub> |
| BCOOH              | C <sub>15</sub> H <sub>26</sub> O <sub>3</sub>  |    | Hydroperoxide from $\beta$ -caryophyllene OH/O <sub>3</sub> + HO <sub>2</sub> chemistry | OP              |
| BENZ               | C <sub>6</sub> H <sub>6</sub>                   |  | Benzene                                                                                 |                 |
| BENZ=O             | C <sub>6</sub> H <sub>6</sub> O <sub>4</sub>    |  | Bicyclic carbonyl oxidation product from benzene chemistry                              | ORA             |
| BENZN              | C <sub>6</sub> H <sub>7</sub> NO <sub>6</sub>   |  | Bicyclic hydroxynitrate from benzene chemistry                                          | ORA             |
| BENZO <sub>2</sub> | C <sub>6</sub> H <sub>7</sub> O <sub>5</sub>    |  | Bicyclic peroxy radical from benzene chemistry                                          | RO <sub>2</sub> |
| BENZOOH            | C <sub>6</sub> H <sub>8</sub> O <sub>5</sub>    |  | Bicyclic hydroperoxide from benzene chemistry                                           | OP              |
| BEPOMUC            | C <sub>6</sub> H <sub>6</sub> O <sub>3</sub>    |  | Unsaturated epoxide-dialdehyde from OH + benzene                                        | MeCHO           |
| BIACETOH           | C <sub>4</sub> H <sub>6</sub> O <sub>3</sub>    |  | 1-Hydroxy-2,3-butanedione                                                               | ORA             |
| BIGACID1           | C <sub>4</sub> H <sub>4</sub> O <sub>3</sub>    |  | 4-Oxo-2-butenoic acid, a product of aromatic oxidation                                  | ORA             |
| BIGACID2           | C <sub>5</sub> H <sub>6</sub> O <sub>3</sub>    |  | 4-Oxo-2-pentenoic acid, a product of aromatic oxidation                                 | ORA             |
| BIGACID3           | C <sub>6</sub> H <sub>8</sub> O <sub>3</sub>    |  | 3-methyl-4-oxo-2-pentenoic acid, a product of xylene oxidation                          | ORA             |
| BIGALD1            | C <sub>4</sub> H <sub>4</sub> O <sub>2</sub>    |  | 1,4-Butenedial, a ring-opening product of aromatic chemistry                            | MeCHO           |

|                               |                                              |                                                                                     |                                                                                  |                 |
|-------------------------------|----------------------------------------------|-------------------------------------------------------------------------------------|----------------------------------------------------------------------------------|-----------------|
| BIGALD2                       | C <sub>5</sub> H <sub>6</sub> O <sub>2</sub> | 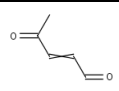   | Unsaturated dicarbonyl, a product of aromatic oxidation                          | MeCHO           |
| BIGALD3                       | C <sub>5</sub> H <sub>6</sub> O <sub>2</sub> |    | Unsaturated dialdehyde, a product of aromatic oxidation                          | MeCHO           |
| BIGALD4                       | C <sub>6</sub> H <sub>8</sub> O <sub>2</sub> |    | Lumped unsaturated dicarbonyls, products of xylene oxidation                     | MeCHO           |
| BIGALK                        | C <sub>5</sub> H <sub>12</sub>               |    | Lumped alkanes C>3                                                               |                 |
| BIGENE                        | C <sub>4</sub> H <sub>8</sub>                |    | Lumped alkenes C>3                                                               |                 |
| BPIN                          | C <sub>10</sub> H <sub>16</sub>              |    | β-Pinene                                                                         |                 |
| BZALD                         | C <sub>7</sub> H <sub>6</sub> O              |    | Benzaldehyde                                                                     | MeCHO           |
| BZFUO                         | C <sub>4</sub> H <sub>4</sub> O <sub>4</sub> |    | BZFUO ring-opening product from BZFUONE chemistry                                | MeCHO           |
| BZFUONE                       | C <sub>4</sub> H <sub>4</sub> O <sub>2</sub> |   | 2(5H)-Furanone, reaction product from aromatic chemistry                         | MeCHO           |
| BZFUONEO <sub>2</sub>         | C <sub>4</sub> H <sub>6</sub> O <sub>5</sub> |  | Peroxy radical from 2(5H)-Furanone OH/NO <sub>3</sub> chemistry                  | RO <sub>2</sub> |
| BZFUONEOOH                    | C <sub>4</sub> H <sub>6</sub> O <sub>5</sub> |  | Hydroperoxide from 2(5H)-Furanone OH/NO <sub>3</sub> + HO <sub>2</sub> chemistry | PAA             |
| BZQCO                         | C <sub>6</sub> H <sub>5</sub> O <sub>4</sub> |  | 3-Hydroxycyclohex-5-ene-1,2,4-trione from quinone chemistry                      | ORA             |
| BZQO <sub>2</sub>             | C <sub>6</sub> H <sub>5</sub> O <sub>5</sub> |  | Peroxy radical from quinone chemistry                                            | RO <sub>2</sub> |
| BZQONE                        | C <sub>6</sub> H <sub>4</sub> O <sub>2</sub> |  | Quinone, reaction product from phenol chemistry                                  | MeCHO           |
| BZQOOH                        | C <sub>6</sub> H <sub>6</sub> O <sub>5</sub> |  | Hydroperoxide from quinone chemistry                                             | PAA             |
| C                             | CH <sub>4</sub>                              |                                                                                     | Methane                                                                          |                 |
| C <sub>2</sub> H <sub>2</sub> | C <sub>2</sub> H <sub>2</sub>                |  | Ethyne (acetylene)                                                               |                 |
| C <sub>2</sub> H <sub>4</sub> | C <sub>2</sub> H <sub>4</sub>                |  | Ethene/ ethylene                                                                 |                 |
| C <sub>3</sub> CO             | C <sub>3</sub> H <sub>2</sub> O <sub>3</sub> |  | Oxopropanedial, reaction product of quinone chemistry                            | MeCHO           |
| C <sub>3</sub> H <sub>6</sub> | C <sub>3</sub> H <sub>6</sub>                |  | Propene                                                                          |                 |

|                   |         |  |                                                            |       |
|-------------------|---------|--|------------------------------------------------------------|-------|
| <b>C3MDIALO2</b>  | C4H5O4  |  | Peroxy radical from MACR                                   | RO2   |
| <b>C3MDIALOH</b>  | C4H6O3  |  | Hydroxy dialdehyde from MACR chemistry                     | ORA   |
| <b>C3MDIALOOH</b> | C4H6O4  |  | Hydroperoxy dialdehyde from MACR chemistry                 | PAA   |
| <b>C4PAN5</b>     | C4H7NO6 |  | Peroxyxynitrate from MBO chemistry                         | PAN   |
| C59O2             | C5H9O5  |  | peroxy radical from ISOPOOH, IEPOX, HPALD                  | RO2   |
| <b>C5DIALOOH</b>  | C5H6O4  |  | Hydroperoxy dialdehyde from BEPOMUC chemistry              | PAA   |
| <b>C5DIALO2</b>   | C5H5O4  |  | Peroxy radical from BEPOMUC chemistry                      | RO2   |
| C5H8              | C5H8    |  | Isoprene                                                   |       |
| <b>C615CO2O2</b>  | C6H7O4  |  | Peroxy radical from TEPOMUC chemistry                      | RO2   |
| <b>C615CO2OOH</b> | C6H8O4  |  | Hydroperoxy dialdehyde from TEPOMUC chemistry              | PAA   |
| <b>C6CO4DB</b>    | C6H4O4  |  | Reaction product of quinone chemistry                      | MeCHO |
| C6H5O             | C6H5O   |  | Phenoxy radical                                            |       |
| C6H5O2            | C6H5O2  |  | Phenylperoxy radical                                       | RO2   |
| C6H5OOH           | C6H6O2  |  | Phenyl hydroperoxide                                       | OP    |
| CATEC1O           | C6H5O2  |  | (2-Hydroxyphenyl) oxidanyl radical from catechol chemistry |       |
| CATEC1O2          | C6H5O3  |  | Peroxy radical from catechol                               | RO2   |
| CATEC1OOH         | C6H6O3  |  | Hydroperoxide from catechol                                | OP    |
| CATECHOL          | C6H6O2  |  | Catechol                                                   |       |
| CC                | C2H6    |  | Ethane                                                     |       |

|                     |        |                                                                                     |                                                       |       |
|---------------------|--------|-------------------------------------------------------------------------------------|-------------------------------------------------------|-------|
| CC(=O)COO           | C3H6O3 | 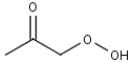   | Acetone hydroperoxide                                 | PAA   |
| CC(=O)CO[O]         | C3H5O3 |    | Propyldioxy, peroxy radical from acetone              | RO2   |
| CCC                 | C3H8   |    | Propane                                               |       |
| CCOO                | C2H6O2 |    | Ethyl hydroperoxide                                   | OP    |
| CH2OHCH2OH          | C2H6O2 |    | Ethylene glycol                                       |       |
| CH2OHCOOH           | C2H4O3 |    | Glycolic acid                                         | ORA   |
| CH3C(O)O2           | C2H3O3 |    | Acetylperoxy radical                                  | RO2   |
| <b>CH3CH(OH)OO</b>  | C2H5O3 |    | (1-Hydroxyethyl) dioxidanyl from ozone C3H6 chemistry | RO2   |
| <b>CH3CH(OH)OOH</b> | C2H6O3 |   | 1-Hydroperoxyethanol from ozone C3H6 chemistry        | OP    |
| CH3CHO              | C2H4O  |  | Acetaldehyde                                          | MeCHO |
| CH3COCH2OH          | C3H6O2 |  | Hydroxyacetone                                        | ORA   |
| CH3COCH3            | C3H6O  |  | Acetone                                               | MeCHO |
| <b>CH3COCO</b>      | C3H4O3 |  | Pyruvic acid                                          | ORA   |
| CH3COOH             | C2H4O2 |  | Acetic acid                                           | ORA   |
| CH3COOOH            | C2H4O3 |  | Peracetic acid                                        | PAA   |
| CH3O2               | CH3O2  |  | Methylperoxy radical                                  | RO2   |
| CH3O2NO2            | CH3NO4 |  | (nitroperoxy)Methane                                  | PAN   |
| CH3OH               | CH4O   |  | Methanol                                              |       |
| CH3OOH              | CH4O2  |  | Methyl hydroperoxide                                  | OP    |
| CO                  | CO     |                                                                                     | Carbon monoxide                                       |       |

|                  |           |                                                                                     |                                                                                                  |       |
|------------------|-----------|-------------------------------------------------------------------------------------|--------------------------------------------------------------------------------------------------|-------|
| <b>CO2C3CHO</b>  | C4H6O2    | 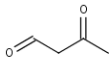   | 3-Oxobutanal                                                                                     | MeCHO |
| <b>CO2C4DIAL</b> | C4H2O4    |    | 2,3-Dioxobutanedial,<br>reaction product of<br>quinone chemistry                                 | MeCHO |
| <b>CO2H3CHO</b>  | C4H6O3    |    | 2-Hydroxy-3-oxobutanal                                                                           | ORA   |
| <b>CRESO2</b>    | C7H9O6    |    | Bicyclic peroxy radical<br>from cresol chemistry                                                 | RO2   |
| <b>CRESOL</b>    | C7H8O     |    | Lumped cresols from<br>toluene oxidation                                                         |       |
| <b>CRESOOH</b>   | C7H10O6   |    | Bicyclic hydroperoxide<br>from cresol chemistry                                                  | OP    |
| <b>DHHPEPOX</b>  | C5H10O5   |    | Lumped dihydroxy-<br>hydroperoxy-epoxide from<br>isoprene chemistry                              | PAA   |
| <b>DHPMEK</b>    | C4H8O5    |    | Dihydroperoxy methyl<br>ketone from isoprene<br>chemmistry                                       | PAA   |
| <b>DHPMPAL</b>   | C4H8O5    |   | Dihydroperoxy methyl<br>aldehyde from isoprene<br>chemistry                                      | PAA   |
| <b>DICARBO2</b>  | C5H5O4    |  | Acylperoxy radical formed<br>from aromatic oxidation,<br>via unsaturated dicarbonyl<br>chemistry | RO2   |
| <b>DICARBOOH</b> | C5H6O4    |  | Acylhydroperoxide formed<br>from aromatic oxidation                                              | PAA   |
| <b>DICARBPAN</b> | C5H5NO6   |  | Hydroxy-peroxyacyl<br>nitrate from DICARBO2                                                      | PAN   |
| <b>DNCATECO2</b> | C6H5N2O11 |  | Dinitro-peroxyradical from<br>nitrocatechol NO <sub>3</sub><br>chemistry                         | RO2   |
| <b>ELVOC</b>     |           |                                                                                     | Extremely low volatile<br>organic compound from<br>monoterpene chemistry                         | PAA   |
| <b>ENE02</b>     | C4H7O3    |  | Lumped hydroxy peroxide<br>alkene C>3 from BIGENE                                                | RO2   |
| <b>EO</b>        | C2H5O2    |  | Hydroxyalkoxy radical<br>from OH ethene chemistry                                                |       |
| <b>EO2</b>       | C2H5O3    |  | Hydroxyperoxy radical<br>from OH ethene chemistry                                                | RO2   |
| <b>EOOH</b>      | C2H6O3    |  | Hydroxyhydroperoxide<br>from OH ethene chemistry                                                 | OP    |
| <b>EPOXDIALD</b> | C4H4O3    |  | Epoxydialdehyde from<br>TEPOMUC chemistry                                                        | ORA   |

|                    |         |                                                                                     |                                                                         |       |
|--------------------|---------|-------------------------------------------------------------------------------------|-------------------------------------------------------------------------|-------|
| <b>ETHLN</b>       | C2H3NO4 | 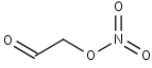   | 2-Oxoethyl nitrate                                                      | ORA   |
| <b>ETHPX</b>       | C2H5O2  |    | Ethylperoxy radical                                                     | RO2   |
| <b>ETOH</b>        | C2H6O   |    | Ethanol                                                                 |       |
| <b>FUONE</b>       | C5H6O2  |    | 3-Methyl-2(5H)-furanone                                                 | MeCHO |
| <b>FUONEO2</b>     | C6H7O5  |    | Peroxy radical from FUONE chemistry                                     | RO2   |
| <b>FUONEOOH</b>    | C6H8O5  |    | Hydroperoxide from from FUONE chemistry                                 | PAA   |
| <b>GLY</b>         | C2H2O2  |    | Glyoxal                                                                 | MeCHO |
| <b>H2</b>          | H2      |                                                                                     | Hydrogen                                                                |       |
| <b>H2O2</b>        | H2O2    |                                                                                     | Hydrogen peroxide                                                       | H2O2  |
| <b>HCHO</b>        | CH2O    |  | Formaldehyde                                                            | HCHO  |
| <b>HCOC5</b>       | C5H8O2  |  | 2-Hydroxy-3-methyl-3-butenal, from isoprene chemistry                   | ORA   |
| <b>HCOCH2OOH</b>   | C2H4O3  |  | Hydroperoxyacetaldehyde                                                 | PAA   |
| <b>HCOCO</b>       | C2HO2   |  | Formyl(oxo)methyl, product of glyoxal OH chemistry                      |       |
| <b>HCOCOHC O3</b>  | C3H3O5  |  | Hydroxy dicarbonyl peroxide                                             | RO2   |
| <b>HCOCOHC O3H</b> | C3H4O5  |  | Hydroxy dicarbonyl hydroperoxide                                        | PAA   |
| <b>HCOCOHPAN</b>   | C3H3NO7 |  | Hydroxy dicarbonyl peroxy nitrate                                       | PAN   |
| <b>HCOOH</b>       | CH2O2   |  | Formic acid                                                             | ORA   |
| <b>HMML</b>        | C4H6O3  |  | 3-(Hydroxymethyl)-3-methyloxirane-2-one product from isoprene chemistry | ORA   |
| <b>HNO3</b>        | HNO3    |                                                                                     | Nitric acid                                                             | HNO3  |
| <b>HNO4</b>        | HNO4    |                                                                                     | Hydroxy nitrate                                                         |       |

|                   |          |  |                                                          |       |
|-------------------|----------|--|----------------------------------------------------------|-------|
| HO2               | HO2      |  | Hydroperoxyl radical                                     |       |
| <b>HOCH2OO</b>    | CH3O3    |  | Hydroxymethylperoxy radical from formaldehyde chemistry  | RO2   |
| <b>HOCH2OOH</b>   | CH4O3    |  | Hydroperoxymethanol from formaldehyde chemistry          | OP    |
| <b>HOCOC4DIAL</b> | C4H4O4   |  | 2-Hydroxy-3-oxobutanedial, product of quinone chemistry  | MeCHO |
| HONO              | HONO     |  | Nitrous acid                                             | HONO  |
| HOOCCHO           | C2H2O3   |  | Glyoxylic acid                                           | ORA   |
| HPALD             | C5H8O3   |  | Unsaturated hydroperoxyaldehyde, from isoprene chemistry | PAA   |
| <b>HVMK</b>       | C4H6O2   |  | 4-Hydroxy-3-buten-2-one from IHNE chemistry              | ORA   |
| IBUTALOH          | C4H8O2   |  | Hydroxymethylpropanal, OH+MBO product                    | ORA   |
| IBUTALOH2         | C4H7O4   |  | Peroxy radical from IBUTALOH oxidation                   | RO2   |
| IBUTALOOH         | C4H8O4   |  | hydroperoxide from IBUTALOH oxidation                    | PAA   |
| <b>IBUTALOOH</b>  | C4H8O3   |  | 2-Hydroxyisobutyric acid from IBUTALOH oxidation         | ORA   |
| <b>IDHNBOO</b>    | C5H10NO7 |  | Peroxy radical from isoprene NO3 chemistry               | RO2   |
| <b>IDHPOO1</b>    | C5H11O6  |  | Peroxy radical from ISOPBOOH/LISOPACOOH OH chemistry     | RO2   |
| <b>IDHPOO2</b>    | C5H11O6  |  | Peroxy radical from ISOPDOOH/LISOPACOOH OH chemistry     | RO2   |
| <b>IDHPOO3</b>    | C5H11O6  |  | Peroxy radical from ISOPBOOH/ISOPDOOH OH chemistry       | RO2   |
| <b>IHNC1O2</b>    | C5H8NO7  |  | Peroxide from IHNE OH chemistry                          | RO2   |
| <b>IHNC2O2</b>    | C5H8NO7  |  | Peroxide from IHNE OH chemistry                          | RO2   |
| <b>IHNC3O2</b>    | C5H8NO7  |  | Peroxide from IHNE OH chemistry                          | RO2   |



|                   |          |  |                                                           |     |
|-------------------|----------|--|-----------------------------------------------------------|-----|
| <b>IHNC4O2</b>    | C5H8NO7  |  | Peroxide from IHNE OH chemistry                           | RO2 |
| <b>IHNE</b>       | C5H9NO5  |  | Hydroxynitrate epoxide from isoprene chemistry            | ORA |
| <b>IHNEOOH</b>    | C5H9NO7  |  | Hydroxyhydroperoxynitrate epoxide from isoprene chemistry | ORA |
| <b>ISOPBNO3</b>   | C5H9NO4  |  | 1,4-hydroxynitrate from OH+isoprene chemistry             | ORA |
| <b>ISOPBNO3O2</b> | C5H10NO7 |  | Peroxy radical from ISOPBNO3                              | RO2 |
| <b>ISOPBO2</b>    | C5H9O3   |  | 1,-isomer of isoprene peroxy radical                      | RO2 |
| <b>ISOPBOOH</b>   | C5H10O3  |  | hydroxyhydroperoxide from isoprene chemistry              | OP  |
| <b>ISOPDNO3</b>   | 5H9NO4   |  | Hydroxynitrate from isoprene chemistry                    | ORA |
| <b>ISOPDNO3O2</b> | C5H10NO7 |  | Peroxy radical from ISOPDNO3                              | RO2 |
| <b>ISOPDO2</b>    | C5H9O3   |  | 2,-Isomer of isoprene peroxy radical                      | RO2 |
| <b>ISOPDOOH</b>   | C5H10O3  |  | Hydroxyhydroperoxide from isoprene chemistry              | OP  |
| <b>LC578O2</b>    | C5H9O5   |  | Dihydroxy aldehyde peroxy radical from isoprene chemistry | RO2 |
| <b>LC578OOH</b>   | C5H10O5  |  | Dihydroxy aldehyde hydroperoxide from isoprene chemistry  | PAA |
| <b>LC5PAN1719</b> | C5H7NO6  |  | Lumped hydroxyperoxyacyl nitrate for C=5                  | PAN |
| <b>LHC4ACCHO</b>  | C5H8O2   |  | Lumped hydroxyaldehyde from isoprene chemistry            | ORA |
| <b>LHC4ACCO2H</b> | C5H8O3   |  | Lumped 4-hydroxy acid from isoprene chemistry             | ORA |
| <b>LHC4ACCO3</b>  | C5H7O4   |  | Lumped hydroxylacylperoxy radical C=5                     | RO2 |
| <b>LHC4ACCO3H</b> | C5H8O4   |  | Lumped hydroxylacylhydroperoxide                          | PAA |
| <b>LHMKABO2</b>   | C4H7O4   |  | Lumped acetylhydroxyperoxide radical                      | RO2 |

|                                         |                                                              |                                                                                     |                                                                      |                 |
|-----------------------------------------|--------------------------------------------------------------|-------------------------------------------------------------------------------------|----------------------------------------------------------------------|-----------------|
| LHMVKABOOH                              | C <sub>4</sub> H <sub>8</sub> O <sub>4</sub>                 | 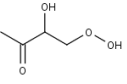   | Lumped acetyl-hydroxy hydroperoxide                                  | PAA             |
| LHMVKNOOH                               | C <sub>4</sub> H <sub>7</sub> N <sub>2</sub> O <sub>6</sub>  |    | Acetyl-hydroperoxy-nitrate from isoprene NO <sub>3</sub> chemistry   | ORA             |
| LIECHO                                  | C <sub>5</sub> H <sub>8</sub> O <sub>3</sub>                 |    | Lumped hydroxy-epoxide aldehyde from isoprene chemistry IEOPX quelle | ORA             |
| LIECO <sub>3</sub> H                    | C <sub>5</sub> H <sub>8</sub> O <sub>5</sub>                 |    | Hydroperoxide from LIECHO                                            | PAA             |
| LIEPOX                                  | C <sub>5</sub> H <sub>10</sub> O <sub>3</sub>                |    | Isoprene derived epoxydiols 97% IOPOXB                               | PAA             |
| LIMONENE                                | C <sub>10</sub> H <sub>16</sub>                              |    | Limonene                                                             |                 |
| LISOPACNO <sub>3</sub>                  | C <sub>5</sub> H <sub>9</sub> N <sub>2</sub> O <sub>4</sub>  |    | Lumped hydroxynitrate from isoprene chemistry                        | ORA             |
| LISOPACNO <sub>3</sub> O <sub>2</sub>   | C <sub>5</sub> H <sub>10</sub> N <sub>2</sub> O <sub>7</sub> |    | Peroxy radical from LISOPACNO <sub>3</sub>                           | RO <sub>2</sub> |
| LISOPACO <sub>2</sub>                   | C <sub>5</sub> H <sub>9</sub> O <sub>3</sub>                 |   | Hydroxyl-peroxy radical from isoprene chemistry                      | RO <sub>2</sub> |
| LISOPACOOH                              | C <sub>5</sub> H <sub>10</sub> O <sub>3</sub>                |  | Hydroxy-hydroperoxide from isoprene chemistry                        | OP              |
| LISOPNO <sub>3</sub> NO <sub>3</sub>    | C <sub>5</sub> H <sub>10</sub> N <sub>2</sub> O <sub>8</sub> |  | Dihydroxy-dinitrate from isoprene chemistry                          | ORA             |
| LISOPNO <sub>3</sub> NO <sub>3</sub> =O | C <sub>5</sub> H <sub>8</sub> N <sub>2</sub> O <sub>8</sub>  |  | Dinitrate-hydroxyketone from isoprene chemistry                      | ORA             |
| LISOPNO <sub>3</sub> OOH                | C <sub>5</sub> H <sub>11</sub> N <sub>2</sub> O <sub>7</sub> |  | Dihydroxy-hydroperoxy nitrate                                        | ORA             |
| LISOPOOHOOH                             | C <sub>5</sub> H <sub>12</sub> O <sub>6</sub>                |  | Lumped dihydroperoxide from isoprene OH chemistry                    | OP              |
| MACO <sub>2</sub> H                     | C <sub>4</sub> H <sub>6</sub> O <sub>2</sub>                 |  | Methacrylic acid                                                     | ORA             |
| MACO <sub>3</sub> H                     | C <sub>4</sub> H <sub>6</sub> O <sub>3</sub>                 |  | Acylhydroperoxide from MACR                                          | PAA             |
| MACR                                    | C <sub>4</sub> H <sub>6</sub> O                              |  | Methacrolein                                                         | MeCHO           |
| MACR <sub>2</sub> N <sub>3</sub> OH     | C <sub>4</sub> H <sub>7</sub> N <sub>2</sub> O <sub>5</sub>  |  | Hydroxynitrate from MACR chemistry                                   | ORA             |
| MACR <sub>2</sub> NOOH                  | C <sub>4</sub> H <sub>7</sub> N <sub>2</sub> O <sub>6</sub>  |  | Acylhydroperoxide from MACRNO <sub>2</sub>                           | ORA             |
| MACRENOL                                | C <sub>4</sub> H <sub>6</sub> O <sub>2</sub>                 |  | Hydroxy methacrolein                                                 | ORA             |

|                                       |                                                |                                                                                     |                                                                       |                 |
|---------------------------------------|------------------------------------------------|-------------------------------------------------------------------------------------|-----------------------------------------------------------------------|-----------------|
| <b>MACRN</b>                          | C <sub>4</sub> H <sub>7</sub> NO <sub>5</sub>  | 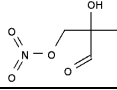   | Hydroxynitrate from isoprene NO <sub>3</sub> chemistry                | ORA             |
| <b>MACRNO<sub>2</sub></b>             | C <sub>4</sub> H <sub>6</sub> NO <sub>7</sub>  |    | Acylperoxy radical from MACR <sub>2</sub> N <sub>3</sub> OH chemistry | RO <sub>2</sub> |
| <b>MACRNOOH</b>                       | C <sub>4</sub> H <sub>7</sub> NO <sub>6</sub>  |    | Hydroperoxynitrate from MACRN chemistry                               | ORA             |
| <b>MACRO<sub>2</sub></b>              | C <sub>4</sub> H <sub>7</sub> O <sub>4</sub>   |    | Hydroxy peroxy radical from methacrolein chemistry                    | RO <sub>2</sub> |
| <b>MACROH</b>                         | C <sub>4</sub> H <sub>8</sub> O <sub>3</sub>   |    | Dihydroxy-acetyl from MACR chemistry                                  | ORA             |
| <b>MACROOH</b>                        | C <sub>4</sub> H <sub>8</sub> O <sub>4</sub>   |    | Hydroxy-hydroperoxide from methacrolein                               | PAA             |
| <b>MALANHY</b>                        | C <sub>4</sub> H <sub>2</sub> O <sub>3</sub>   |    | Maleic anhydride                                                      | MeCHO           |
| <b>MALANHYCO</b>                      | C <sub>4</sub> H <sub>2</sub> O <sub>5</sub>   |   | Hydroxy-ketone from MALANHY                                           |                 |
| <b>MALANHYO<sub>2</sub></b>           | C <sub>4</sub> H <sub>3</sub> O <sub>6</sub>   |  | Hydroxy-peroxide from MALANHY                                         | RO <sub>2</sub> |
| <b>MALANHYOOH</b>                     | C <sub>4</sub> H <sub>4</sub> O <sub>6</sub>   |  | Hydroxy-hydroperoxide from MALANHY                                    | PAA             |
| <b>MALO<sub>2</sub></b>               | C <sub>4</sub> H <sub>3</sub> O <sub>4</sub>   |  | Acylperoxy radical from OH reaction with BIGALD <sub>1</sub>          | RO <sub>2</sub> |
| <b>MALOOH</b>                         | C <sub>4</sub> H <sub>4</sub> O <sub>4</sub>   |  | Acylhydroperoxide from MALO <sub>2</sub>                              | PAA             |
| <b>MALPAN</b>                         | C <sub>4</sub> H <sub>3</sub> NO <sub>6</sub>  |  | Acylperoxynitrate from MALO <sub>2</sub>                              | PAN             |
| <b>MBO</b>                            | C <sub>5</sub> H <sub>10</sub> O               |  | 2-Methyl-3-buten-2-ol                                                 |                 |
| <b>MBONO<sub>3</sub>O<sub>2</sub></b> | C <sub>5</sub> H <sub>10</sub> NO <sub>6</sub> |  | Peroxy radical from NO <sub>3</sub> +MBO                              | RO <sub>2</sub> |
| <b>MBONO<sub>3</sub>OOH</b>           | C <sub>5</sub> H <sub>11</sub> NO <sub>6</sub> |  | Hydroperoxy-nitrate from MBO chemistry                                | ORA             |
| <b>MBOO<sub>2</sub></b>               | C <sub>5</sub> H <sub>11</sub> O <sub>4</sub>  |  | Hydroxyl-peroxy radical from MBO chemistry                            | RO <sub>2</sub> |
| <b>MBOOOH</b>                         | C <sub>5</sub> H <sub>12</sub> O <sub>4</sub>  |  | Hydroxy-hydroperoxide from MBO chemistry                              | OP              |

|          |         |                                                                                     |                                                           |       |
|----------|---------|-------------------------------------------------------------------------------------|-----------------------------------------------------------|-------|
| MCO3     | C4H5O3  | 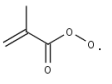   | Acylperoxy radical from OH abstraction reaction with MACR | RO2   |
| MDIALO2  | C5H5O4  |    | Peroxy radical from OH addition to BIGALD3                | RO2   |
| MDIALOOH | C5H6O4  |    | Lumped Acyl-hydroperoxy-aldehyde                          | PAA   |
| MDIALPAN | C5H5NO6 |    | Acylperoxynitrate from MDIALO2                            | PAN   |
| MEK      | C4H8O   |    | Methyl ethyl ketone                                       | MeCHO |
| MEKANO3  | C4H7NO4 |    | Nitrate from MEK chemistry                                | ORA   |
| MEKAO2   | C4H7O3  |    | Peroxy radical from MEK chemistry                         | RO2   |
| MEKAOH   | C4H8O2  |    | C4 Hydroxy butanone                                       | ORA   |
| MEKAOOH  | C4H8O3  |   | Hydroperoxide from MEK chemistry                          | PAA   |
| MEKBO2   | C4H7O3  |  | Peroxy radical from MEK chemistry                         | RO2   |
| MEKBOH   | C4H8O2  |  | C4 Hydroxy butanone                                       | ORA   |
| MEKBOOH  | C4H8O3  |  | Hydroperoxide from MEK chemistry                          | PAA   |
| MEKCO2   | C4H7O3  |  | Peroxy radical from MEK chemistry                         | RO2   |
| MEKCOH   | C4H8O2  |  | C4 Hydroxy butanone                                       | ORA   |
| MEKCOOH  | C4H8O3  |  | Hydroperoxide from MEK chemistry                          | PAA   |
| MGLY     | C3H4O2  |  | Methyl glyoxal                                            | MeCHO |
| MPAN     | C4H5NO5 |  | Methacryloyl peroxynitrate                                | PAN   |
| MVK      | C4H6O   |  | Methyl vinyl ketone                                       | MeCHO |
| MVKN     | C4H7NO5 |  | Hydroxy nitrate from MVK chemistry                        | ORA   |
| MVKOH    | C4H8O3  |  | Dihydroxy-acetyl from MVK chemistry                       | ORA   |

|                               |                                                              |                                                                                     |                                                                                                                                                                   |                 |
|-------------------------------|--------------------------------------------------------------|-------------------------------------------------------------------------------------|-------------------------------------------------------------------------------------------------------------------------------------------------------------------|-----------------|
| MYRC                          | C <sub>10</sub> H <sub>16</sub>                              | 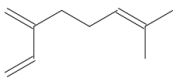   | Myrcene                                                                                                                                                           |                 |
| N <sub>2</sub> O <sub>5</sub> |                                                              |                                                                                     | Dinitrogen pentoxide                                                                                                                                              |                 |
| N <sub>2</sub> PHEN           | C <sub>6</sub> H <sub>4</sub> N <sub>2</sub> O <sub>5</sub>  |    | 2,4-Dinitrophenol                                                                                                                                                 | ORA             |
| NAROMOLOOH                    |                                                              |    | Lumped peroxyhydrate from phenols with one or two nitro groups, completely conversion to SOA (structure shown for NCATECO <sub>2</sub> + HO <sub>2</sub> product) | ORA             |
| NBZQO <sub>2</sub>            | C <sub>6</sub> H <sub>4</sub> N <sub>2</sub> O <sub>7</sub>  |    | Peroxy radical from quinone NO <sub>3</sub> chemistry                                                                                                             | RO <sub>2</sub> |
| NBZQOOH                       | C <sub>6</sub> H <sub>5</sub> N <sub>2</sub> O <sub>7</sub>  |    | Hydroperoxide from quinone chemistry                                                                                                                              | ORA             |
| NC <sub>4</sub> CHO           | C <sub>5</sub> H <sub>7</sub> N <sub>2</sub> O <sub>4</sub>  |   | Nitrooxy-aldehyde from NO <sub>3</sub> +isoprene chemistry                                                                                                        | ORA             |
| NCATECHOL                     | C <sub>6</sub> H <sub>5</sub> N <sub>2</sub> O <sub>4</sub>  |  | 4-Nitrocatechol                                                                                                                                                   | ORA             |
| NCATECO <sub>2</sub>          | C <sub>6</sub> H <sub>6</sub> N <sub>2</sub> O <sub>9</sub>  |  | Bicyclic peroxy radical from 4-nitrocatechol OH chemistry                                                                                                         | RO <sub>2</sub> |
| NCRESO <sub>2</sub>           | C <sub>7</sub> H <sub>8</sub> N <sub>2</sub> O <sub>8</sub>  |  | Bicyclic peroxy radical from cresol NO <sub>3</sub> chemistry                                                                                                     | RO <sub>2</sub> |
| NCRESOOH                      | C <sub>7</sub> H <sub>9</sub> N <sub>2</sub> O <sub>8</sub>  |  | Hydroperoxide from cresol chemistry                                                                                                                               | ORA             |
| NDNPHENO <sub>2</sub>         | C <sub>6</sub> H <sub>4</sub> N <sub>3</sub> O <sub>12</sub> |  | Bicyclic peroxy radical from 2,4-Dinitrophenol NO <sub>3</sub> chemistry                                                                                          | RO <sub>2</sub> |
| NH <sub>3</sub>               |                                                              |                                                                                     | Ammonia                                                                                                                                                           | NH <sub>3</sub> |
| NISOPBO <sub>2</sub>          | C <sub>5</sub> H <sub>8</sub> N <sub>2</sub> O <sub>5</sub>  |  | Peroxy radical from isoprene NO <sub>3</sub> oxidation                                                                                                            | RO <sub>2</sub> |
| NISOPBOO                      | C <sub>5</sub> H <sub>11</sub> N <sub>2</sub> O <sub>8</sub> |  | Peroxy radical from isoprene NO <sub>3</sub> chemistry with nitrate, hydroxyl, hydroperoxy and inner peroxy group                                                 | RO <sub>2</sub> |
| NISOPBOOH                     | C <sub>5</sub> H <sub>9</sub> N <sub>2</sub> O <sub>5</sub>  |  | Hydroperoxy-nitrate from isoprene NO <sub>3</sub> chemistry                                                                                                       | ORA             |
| NISOPDO <sub>2</sub>          | C <sub>5</sub> H <sub>8</sub> N <sub>2</sub> O <sub>5</sub>  |  | Peroxy radical from isoprene NO <sub>3</sub> oxidation                                                                                                            | RO <sub>2</sub> |

|                     |           |                                                                                     |                                                                                                                      |     |
|---------------------|-----------|-------------------------------------------------------------------------------------|----------------------------------------------------------------------------------------------------------------------|-----|
| <b>NISOPDOO</b>     | C5H11NO8  | 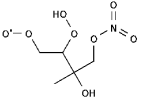   | Peroxy radical from isoprene NO <sub>3</sub> chemistry with nitrate, hydroxyl, hydroperoxy and terminal peroxy group | RO2 |
| <b>NISOPDOOH</b>    | C5H9NO5   |    | Hydroperoxy-nitrate from isoprene NO <sub>3</sub> chemistry                                                          | ORA |
| <b>NISOPEOO1E</b>   | C5H8N1O6  |    | Peroxy-nitrate radical from isoprene NO <sub>3</sub> chemistry with cyclic ether ring                                | RO2 |
| <b>NISOPEOO1Z</b>   | C5H8N1O6  |    | Peroxy-nitrate radical from isoprene NO <sub>3</sub> chemistry with cyclic ether ring                                | RO2 |
| <b>NISOPN</b>       | C5H8N2O6  |    | Lumped dinitrate from isoprene NO <sub>3</sub> chemistry                                                             | ORA |
| <b>NISOPNOO</b>     | C5H9N2O8  |    | Lumped peroxy radical from NISOPN                                                                                    | RO2 |
| <b>NISOPNOOH</b>    | C5H10N2O9 |   | Lumped hydroxy-hydroperoxy dinitrate from isoprene chemistry                                                         | ORA |
| <b>NISOPO</b>       | C5H9NO4   |  | Nitrate-oxyl radical from isoprene chemistry                                                                         |     |
| <b>NISOPOH</b>      | C5H9NO4   |  | Lumped Hydroxynitrate from isoprene NO <sub>3</sub> chemistry                                                        | ORA |
| <b>NISOPOHOH=O</b>  | C5H9NO6   |  | Dihydroxy-nitrate-aldehyde from isoprene NO <sub>3</sub> chemistry                                                   | ORA |
| <b>NISOPOOHOH=O</b> | C5H9NO7   |  | Hydroperoxynitrate-Hydroxy-aldehyde form isoprene NO <sub>3</sub> chemistry                                          | ORA |
| <b>NISOPOOHOOH</b>  | C5H11NO8  |  | Hydroxynitrate dihydroperoxide from isoprene NO <sub>3</sub> chemistry                                               | ORA |
| NO                  | NO        |                                                                                     | Nitric oxide                                                                                                         | NO  |
| NO2                 | NO2       |                                                                                     | Nitrogen dioxide                                                                                                     | NO2 |
| NO3                 | NO3       |                                                                                     | Nitrate radical                                                                                                      | NO3 |
| <b>NO3CH2CO3</b>    | C2H2NO6   |  | Acylperoxy radical of 2-oxoethyl nitrate                                                                             | RO2 |
| <b>NO3CH2CO3H</b>   | C2H2NO6   |  | Acylhydroperoxy of 2-oxoethyl nitrate                                                                                | ORA |
| <b>NO3CH2PAN</b>    | C2H2N2O8  |  | Peroxyacetyl-dinitrate                                                                                               | PAN |
| NOA                 | C3H5NO4   |  | 2-Oxopropyl-nitrate from NO <sub>3</sub> +propene chemistry                                                          | ORA |

|                         |                                               |                                                                                     |                                                                     |                 |
|-------------------------|-----------------------------------------------|-------------------------------------------------------------------------------------|---------------------------------------------------------------------|-----------------|
| <b>NPHEN</b>            | C <sub>6</sub> H <sub>5</sub> NO <sub>3</sub> | 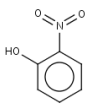   | 2-Nitrophenol                                                       | ORA             |
| <b>NPHENO</b>           | C <sub>6</sub> H <sub>4</sub> NO <sub>3</sub> |    | 2-Nitrophenoxyradical                                               |                 |
| <b>NPHENO2</b>          | C <sub>6</sub> H <sub>4</sub> NO <sub>4</sub> |    | 2-Nitrophenperoxyradical                                            | RO <sub>2</sub> |
| <b>NPHENOLO2</b>        | C <sub>6</sub> H <sub>6</sub> NO <sub>8</sub> |    | Bicyclic peroxy radical from phenol NO <sub>3</sub> chemistry       | RO <sub>2</sub> |
| <b>NPHENOLOOH</b>       | C <sub>6</sub> H <sub>7</sub> NO <sub>8</sub> |    | Hydroperoxide from phenol chemistry                                 | ORA             |
| <b>NPHENO2OH</b>        | C <sub>6</sub> H <sub>5</sub> NO <sub>4</sub> |    | 1-Hydroperoxy-2-nitrobenzene                                        | ORA             |
| NTERPNO <sub>3</sub>    |                                               |                                                                                     | Second generation products from monerpene+NO <sub>3</sub> chemistry | ORA             |
| NTERPO <sub>2</sub>     |                                               |                                                                                     | Peroxy radical from NO <sub>3</sub> +monoterpene chemistry          | RO <sub>2</sub> |
| NTERPOOH                |                                               |                                                                                     | Hydroperoxide from NO <sub>3</sub> +monoterpene chemistry           | ORA             |
| O1D                     | O                                             |                                                                                     | Excited oxygen atom                                                 |                 |
| O <sub>3</sub>          | O <sub>3</sub>                                |                                                                                     | Ozone                                                               |                 |
| O <sub>3</sub> PX       | O <sub>3</sub> PX                             |                                                                                     | Ground-state oxygen atom                                            |                 |
| O=C(OO)C=O              | C <sub>2</sub> H <sub>2</sub> O <sub>4</sub>  |  | 2-Oxoethaneperoxoic acid                                            | PAA             |
| O=CC(=O)O[O]            | C <sub>2</sub> H <sub>2</sub> O <sub>4</sub>  |  | Glyoxyloxy radical                                                  | RO <sub>2</sub> |
| OCC(=O)OO               | C <sub>2</sub> H <sub>4</sub> O <sub>4</sub>  |  | Ethaneperoxoic acid                                                 | PAA             |
| <b>OCC(=O)OON(=O)=O</b> | C <sub>2</sub> H <sub>3</sub> NO <sub>6</sub> |  | 2-Hydroxy-1-(nitroperoxy)ethanone                                   | PAN             |
| OCC(=O)O[O]             | C <sub>2</sub> H <sub>3</sub> O <sub>4</sub>  |  | 2-Hydroxyacetylperoxy-radical                                       | RO <sub>2</sub> |
| OH                      | OH                                            |                                                                                     | Hydroxyl radical                                                    |                 |
| OHCCH <sub>2</sub> OH   | C <sub>2</sub> H <sub>4</sub> O <sub>2</sub>  |  | Gglycolaldehyde                                                     | ORA             |

|                |           |                                                                                     |                                                                                                      |       |
|----------------|-----------|-------------------------------------------------------------------------------------|------------------------------------------------------------------------------------------------------|-------|
| <b>P1NO3</b>   | C15H25NO6 | 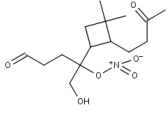   | Higher generation Nitrate from $\beta$ -caryophyllene OH/O <sub>3</sub> chemistry                    | ORA   |
| <b>P1O2</b>    | C15H25O5  |    | Higher generation peroxy radical from $\beta$ -caryophyllene OH/O <sub>3</sub> chemistry             | RO2   |
| <b>PSQTOOH</b> | C15H26O5  |    | Higher generation non-volatile hydroperoxide from $\beta$ -caryophyllene OH/O <sub>3</sub> chemistry | PAA   |
| <b>P2NO3</b>   | C15H25NO7 |    | Higher generation non-volatile Nitrate from $\beta$ -caryophyllene OH/O <sub>3</sub> chemistry       | ORA   |
| <b>P2O2</b>    | C15H25O6  |    | Higher generation peroxy radical from $\beta$ -caryophyllene O <sub>3</sub> chemistry                | RO2   |
| PAN            | C2H3NO5   |    | Peroxy acetyl nitrate                                                                                | PAN   |
| PBZNIT         | C7H5NO5   |   | Peroxy benzoyl nitrate                                                                               | PAN   |
| <b>PHCOOH</b>  | C7H6O2    |  | Benzoic acid                                                                                         | ORA   |
| PHENO2         | C6H7O6    |  | Bicyclic peroxy radical from phenol                                                                  | RO2   |
| PHENOL         | C6H6O     |  | Phenol, product of benzene chemistry                                                                 |       |
| PHENO2H        | C6H8O6    |  | Bicyclic hydroperoxide from phenol                                                                   | OP    |
| PO2            | C3H7O3    |  | Propene-derived peroxy radical                                                                       | RO2   |
| POOH           | C3H8O3    |  | Propene-derived hydroxy hydroperoxide                                                                | OP    |
| PR2O2HNO3      | C3H7NO5   |  | Hydroperoxy-alkylnitrate from propene NO <sub>3</sub> chemistry                                      | ORA   |
| <b>PROD1</b>   | C15H24O2  |  | Lumped second generation products from $\beta$ -caryophyllene OH/O <sub>3</sub> chemistry            | MeCHO |
| <b>PROD2</b>   | C15H24O3  |  | Second generation acid from $\beta$ -caryophyllene O <sub>3</sub> chemistry                          | ORA   |
| <b>PROD3</b>   | C14H22O3  |  | Lumped higher generation products from $\beta$ -caryophyllene OH/O <sub>3</sub> chemistry            | MeCHO |



|                     |                                                |                                                                                     |                                                                      |                 |
|---------------------|------------------------------------------------|-------------------------------------------------------------------------------------|----------------------------------------------------------------------|-----------------|
| <b>PROD4</b>        | C <sub>14</sub> H <sub>22</sub> O <sub>4</sub> | 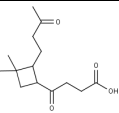   | Higher generation acid from β-caryophyllene O <sub>3</sub> chemistry | ORA             |
| PRONO3BO2           | C <sub>3</sub> H <sub>6</sub> NO <sub>5</sub>  |    | Alkyl nitrate-peroxy radical from propene NO <sub>3</sub> chemistry  | RO <sub>2</sub> |
| PROPOOH             | C <sub>3</sub> H <sub>8</sub> O <sub>2</sub>   |    | Propyl hydroperoxide                                                 | OP              |
| PROPPX              | C <sub>3</sub> H <sub>7</sub> O <sub>2</sub>   |    | Propylperoxy radical                                                 | RO <sub>2</sub> |
| SO <sub>2</sub>     | SO <sub>2</sub>                                |                                                                                     | Sulfure dioxide                                                      | SO <sub>2</sub> |
| SULF                | H <sub>2</sub> SO <sub>4</sub>                 |                                                                                     | Sulfuric acid                                                        | SULF            |
| TEPOMUC             | C <sub>7</sub> H <sub>8</sub> O <sub>3</sub>   |    | Dialdehyde with cyclic ether from toluene and xylene chemistry       | MeCHO           |
| TERP2O <sub>2</sub> |                                                |                                                                                     | Lumped peroxy radical from second generation monoterpene oxidation   | RO <sub>2</sub> |
| TERP2OOH            |                                                |                                                                                     | Lumped second generation monoterpene hydroperoxide                   | PAA             |
| TERPNO <sub>3</sub> |                                                |                                                                                     | Lumped hydroxynitrates from monoterpene OH chemistry                 | ORA             |
| TERPO <sub>2</sub>  |                                                |                                                                                     | Lumped peroxy radical from monoterpenes OH chemistry                 | RO <sub>2</sub> |
| TERPOOH             |                                                |                                                                                     | Lumped hydroperoxide from monoterpene OH chemistry                   | OP              |
| TERPROD1            |                                                |                                                                                     | Lumped first generation monoterpene oxidation products               | MeCHO           |
| TERPROD2            |                                                |                                                                                     | Lumped second generation monoterpene oxidation product               | MeCHO           |
| TOL                 | C <sub>7</sub> H <sub>8</sub>                  |  | Toluene                                                              |                 |
| <b>TOL=O</b>        | C <sub>7</sub> H <sub>8</sub> NO <sub>4</sub>  |  | Bicyclic carbonyl oxidation product from toluene chemistry           | ORA             |
| <b>TOLN</b>         | C <sub>7</sub> H <sub>9</sub> NO <sub>6</sub>  |  | Bicyclic hydroxynitrate from toluene chemistry                       | ORA             |
| TOLO <sub>2</sub>   | C <sub>7</sub> H <sub>9</sub> O <sub>5</sub>   |  | Bicyclic peroxy radical from toluene                                 | RO <sub>2</sub> |

|               |          |                                                                                   |                                                  |     |
|---------------|----------|-----------------------------------------------------------------------------------|--------------------------------------------------|-----|
| TOLOOH        | C7H10O5  | 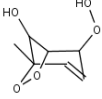 | Bicyclic hydroperoxide from toluene              | OP  |
| XYL           | C8H10    |  | Lumped xylene species                            |     |
| XYLENO2       | C8H11O5  |  | Bicyclic peroxy radical from xylene OH chemistry | RO2 |
| XYLENOOH      | C8H12O5  |  | Bicyclic hydroperoxide from xylene OH chemistry  | OP  |
| <b>XYLNO3</b> | C8H11NO6 |  | Bicyclic hydroxynitrate from xylene chemistry    | ORA |
| XYLOL         | C8H10O   |  | Dimethyl-phenol from xylene chemistry            |     |

URMELL contains several complex rate coefficients, which are provided hereafter. The corresponding parameter values are given in Table S1-2 as well as the related references.

$$k_{O_3PX}(P_1, P_2) = M \times P_1 \times \left( \frac{T}{300} \right)^{P_2}$$

$$k_{HO_2O_3}(P_1, P_2, P_3) = P_1 \times \left( \frac{T}{300} \right)^{P_2} \times \exp \left( \frac{P_3}{T} \right)$$

$$k_{HO_2}(P_1, P_2, P_3, P_4) = P_1 \times \exp \left( \frac{P_2}{T} \right) + M \times P_3 \times \exp \left( \frac{P_4}{T} \right)$$

$$k_{tro}(P_1, P_2, P_3, P_4, P_5, P_6, P_7) = \frac{k_0 \times k_\infty}{k_0 + k_\infty} \times P_7^{\frac{1}{1+k_1}}$$

$$k_1 = \left( \frac{\log_{10} \left( \frac{k_0}{k_\infty} \right)}{0.75 - 1.27 \times \log_{10}(P_7)} \right)^2$$

$$k_0 = M \times P_1 \times \left( \frac{T}{300} \right)^{P_2} \times \exp \left( \frac{P_3}{T} \right)$$

$$k_\infty = P_4 \times \left( \frac{T}{300} \right)^{P_5} \times \exp \left( \frac{P_6}{T} \right)$$

$$k_{HNO_3}(P_1, P_2, P_3, P_4, P_5, P_6) = k_0 + \frac{k_2}{1 + k_2/k_1}$$

$$k_0 = P_1 \times \exp \left( \frac{P_2}{T} \right)$$

$$k_1 = P_3 \times \exp \left( \frac{P_4}{T} \right)$$

$$k_2 = M \times P_5 \times \exp \left( \frac{P_6}{T} \right)$$

$$k_{CO}(P_1, P_2) = P_1 \times \left( 1 + \frac{M}{P_2} \right)$$

$$k_{iso}(P_1, P_2, P_3) = P_1 \times \exp \left( -\frac{P_2}{T} \right) \times \exp \left( \frac{P_3}{T^3} \right)$$

**Table S1-2:** Chemical reactions of URMELL, their reaction rate coefficient as well as references and comments. Complex rate coefficients are summarized beforehand. Next to the MCM3.3.1 and IUPAC data the following references have been used for the mechanism development: Schultz *et al.*<sup>3</sup>, Chen *et al.*<sup>4</sup>, Cox *et al.*<sup>5</sup>, Jenkin *et al.*<sup>6</sup>, Wennberg *et al.*<sup>1</sup>, Vereecken *et al.*<sup>2</sup>, Sheps *et al.*<sup>7</sup>, Teng *et al.*<sup>8</sup>, Müller *et al.*<sup>9</sup>, Jenkin *et al.*<sup>10</sup>, Khan *et al.*<sup>11</sup>, Jenkin *et al.*<sup>12</sup> and Bates *et al.*<sup>13</sup>. All reaction equations marked with an X or a number from 1 to 5 deviate from original JAMv2b formula.

| Reaction                            | Rate coefficient                                                        | Reference & comments |   |
|-------------------------------------|-------------------------------------------------------------------------|----------------------|---|
| O <sub>x</sub> chemistry            |                                                                         |                      |   |
| O3PX $\xrightarrow{O_2}$ O3         | $k_{O3PX}(6.0 \times 10^{-34}, -2.6)$                                   | IUPAC                | X |
| O3PX + O3 $\rightarrow$             | $8.0 \times 10^{-12} \times \exp(-2060/T)$                              | <sup>3</sup> , IUPAC |   |
| O1D $\xrightarrow{O_2}$ O3PX        | $3.2 \times 10^{-11} \times \exp(67/T)$                                 | IUPAC                | X |
| O1D $\xrightarrow{N_2}$ O3PX        | $2.15 \times 10^{-11} \times \exp(110/T)$                               | <sup>3</sup> , IUPAC |   |
| O1D $\xrightarrow{H_2O}$ OH + OH    | $2.14 \times 10^{-10}$                                                  | IUPAC                | X |
| HO <sub>x</sub> chemistry           |                                                                         |                      |   |
| H2 + OH $\rightarrow$ HO2           | $7.7 \times 10^{-12} \times \exp(-2100/T)$                              | IUPAC, MCM           | X |
| OH + O3 $\rightarrow$ HO2           | $1.7 \times 10^{-12} \times \exp(-940/T)$                               | <sup>3</sup> , IUPAC |   |
| HO2 + O3 $\rightarrow$ OH           | $k_{HO2O3}(2.03 \times 10^{-16}, 4.57, 6.93)$                           | <sup>3</sup> , IUPAC |   |
| HO2 + HO2 $\xrightarrow{M}$ H2O2    | $k_{HO2}(2.2 \times 10^{-13}, 600, 1.93 \times 10^{-13}, 980)$          | <sup>3</sup> , IUPAC |   |
| HO2 + HO2 $\xrightarrow{H_2O}$ H2O2 | $k_{HO2}(3.08 \times 10^{-34}, 2800, 2.66 \times 10^{-54}, 3180)$       | <sup>3</sup> , IUPAC |   |
| H2O2 + OH $\rightarrow$ HO2         | $2.9 \times 10^{-12} \times \exp(-160/T)$                               | IUPAC                | X |
| OH + HO2 $\rightarrow$              | $4.8 \times 10^{-11} \times \exp(250/T)$                                | <sup>3</sup> , IUPAC |   |
| NO <sub>x</sub> chemistry           |                                                                         |                      |   |
| NO + O3PX $\xrightarrow{M}$ NO2     | $k_{tro}(1 \times 10^{-31}, -1.6, 0, 5 \times 10^{-11}, -0.3, 0, 0.85)$ | IUPAC                | X |
| NO2 + O3PX $\rightarrow$ NO         | $5.1 \times 10^{-12} \times \exp(198/T)$                                | IUPAC                | X |

|                                     |                     |                                   |                                                                                             |                      |   |
|-------------------------------------|---------------------|-----------------------------------|---------------------------------------------------------------------------------------------|----------------------|---|
| NO <sub>2</sub> + O <sub>3</sub> PX | $\xrightarrow{M}$   | NO <sub>3</sub>                   | $k_{tro}(1.3 \times 10^{-31}, -1.5, 0, 2.3 \times 10^{-11}, 0.24, 0, 0.6)$                  | IUPAC                | X |
| NO + NO                             | $\xrightarrow{O_2}$ | NO <sub>2</sub> + NO <sub>2</sub> | $4.25 \times 10^{-39} \times \exp(663.5/T)$                                                 | IUPAC                | X |
| NO <sub>2</sub> + NO <sub>3</sub>   | $\rightarrow$       | NO + NO <sub>2</sub>              | $4.5 \times 10^{-14} \times \exp(-1260/T)$                                                  | MCM                  | X |
| NO <sub>2</sub> + NO <sub>3</sub>   | $\xrightarrow{M}$   | N <sub>2</sub> O <sub>5</sub>     | $k_{tro}(3.6 \times 10^{-30}, -4.1, 0, 1.9 \times 10^{-12}, 0.2, 0, 0.35)$                  | IUPAC                | X |
| HO <sub>2</sub> + NO                | $\rightarrow$       | OH + NO <sub>2</sub>              | $3.45 \times 10^{-12} \times \exp(270/T)$                                                   | IUPAC                | X |
| NO + O <sub>3</sub>                 | $\rightarrow$       | NO <sub>2</sub>                   | $2.07 \times 10^{-12} \times \exp(-1400/T)$                                                 | IUPAC                | X |
| NO <sub>2</sub> + O <sub>3</sub>    | $\rightarrow$       | NO <sub>3</sub>                   | $1.4 \times 10^{-13} \times \exp(-2470/T)$                                                  | IUPAC                | X |
| NO <sub>3</sub> + HO <sub>2</sub>   | $\rightarrow$       | OH + NO <sub>2</sub>              | $4.0 \times 10^{-12}$                                                                       | IUPAC, MCM           | X |
| N <sub>2</sub> O <sub>5</sub>       | $\xrightarrow{M}$   | NO <sub>2</sub> + NO <sub>3</sub> | $k_{tro}(1.3 \times 10^{-3}, -3.5, -11000, 9.7 \times 10^{14}, 0.1, -11080, 0.35)$          | IUPAC                | X |
| NO + OH                             | $\xrightarrow{M}$   | HONO                              | $k_{tro}(7.4 \times 10^{-31}, -2.4, 0, 3.3 \times 10^{-11}, -0.3, 0, 0.81)$                 | IUPAC                | X |
| HONO + OH                           | $\rightarrow$       | NO <sub>2</sub>                   | $2.5 \times 10^{-12} \times \exp(260/T)$                                                    | IUPAC                | X |
| NO <sub>2</sub> + OH                | $\xrightarrow{M}$   | HNO <sub>3</sub>                  | $k_{tro}(3.2 \times 10^{-30}, -4.5, 0, 3 \times 10^{-11}, 0, 0, 0.41)$                      | IUPAC                | X |
| HNO <sub>3</sub> + OH               | $\rightarrow$       | NO <sub>3</sub>                   | $k_{HNO_3}(2.4 \times 10^{-14}, 460, 2.7 \times 10^{-17}, 2199, 6.5 \times 10^{-34}, 1335)$ | <sup>3</sup> , IUPAC |   |
| NO + NO <sub>3</sub>                | $\rightarrow$       | NO <sub>2</sub> + NO <sub>2</sub> | $1.8 \times 10^{-11} \times \exp(110/T)$                                                    | IUPAC                | X |
| NO <sub>2</sub> + HO <sub>2</sub>   | $\xrightarrow{M}$   | HNO <sub>4</sub>                  | $k_{tro}(1.4 \times 10^{-31}, -3.1, 0, 4 \times 10^{-12}, 0, 0, 0.4)$                       | IUPAC                | X |
| HNO <sub>4</sub> + OH               | $\rightarrow$       | NO <sub>2</sub>                   | $3.2 \times 10^{-13} \times \exp(690/T)$                                                    | IUPAC                | X |
| HNO <sub>4</sub>                    | $\xrightarrow{M}$   | HO <sub>2</sub> + NO <sub>2</sub> | $k_{tro}(4.1 \times 10^{-5}, 0, -10650, 6 \times 10^{15}, 0, -11170, 0.4)$                  | IUPAC                | X |
| NO <sub>3</sub> + OH                | $\rightarrow$       | HO <sub>2</sub> + NO <sub>2</sub> | $2.0 \times 10^{-11}$                                                                       | IUPAC                | X |
| NH <sub>3</sub> + OH                | $\rightarrow$       |                                   | $3.5 \times 10^{-12} \times \exp(-925/T)$                                                   | <sup>3</sup> , IUPAC | X |

|                                                                 |                   |                                                                                                                                |                                                                            |                                    |   |
|-----------------------------------------------------------------|-------------------|--------------------------------------------------------------------------------------------------------------------------------|----------------------------------------------------------------------------|------------------------------------|---|
| Sulfur chemistry                                                |                   |                                                                                                                                |                                                                            |                                    |   |
| SO <sub>2</sub> + OH                                            | $\xrightarrow{M}$ | SULF                                                                                                                           | $k_{tro}(2.8 \times 10^{-31}, -2.6, 0, 2 \times 10^{-12}, 0, 0, 0.53)$     | IUPAC with F <sub>c</sub> for 298K | X |
| C1 chemistry                                                    |                   |                                                                                                                                |                                                                            |                                    |   |
| CH <sub>4</sub> + OH                                            | $\rightarrow$     | CH <sub>3</sub> O <sub>2</sub>                                                                                                 | $1.85 \times 10^{-12} \times \exp(-1690/T)$                                | MCM                                | X |
| CH <sub>3</sub> O <sub>2</sub> + NO                             | $\rightarrow$     | HCHO + HO <sub>2</sub> + NO <sub>2</sub>                                                                                       | $2.3 \times 10^{-12} \times \exp(360/T)$                                   | IUPAC                              | X |
| CH <sub>3</sub> O <sub>2</sub> + CH <sub>3</sub> O <sub>2</sub> | $\rightarrow$     | HCHO + HO <sub>2</sub> + HCHO + HO <sub>2</sub>                                                                                | $7.4 \times 10^{-13} \times \exp(-520/T)$                                  | <sup>3</sup> , IUPAC               |   |
| CH <sub>3</sub> O <sub>2</sub> + CH <sub>3</sub> O <sub>2</sub> | $\rightarrow$     | HCHO + CH <sub>3</sub> OH                                                                                                      | $2.33 \times 10^{-14} \times \exp(678/T)$                                  | <sup>3</sup> , IUPAC               |   |
| CH <sub>3</sub> O <sub>2</sub> + OH                             | $\rightarrow$     | 0.95 HCHO + 1.9 HO <sub>2</sub> + 0.0275 HOCH <sub>2</sub> OOH + 0.02 HCHO + 0.02 H <sub>2</sub> O <sub>2</sub> + 0.0025 HCOOH | $3.7 \times 10^{-11} \times \exp(350/T)$                                   | IUPAC; for sCI see sec. 2.6        | X |
| CH <sub>3</sub> O <sub>2</sub> + HO <sub>2</sub>                | $\rightarrow$     | 0.9 CH <sub>3</sub> OOH + 0.1 HCHO                                                                                             | $3.8 \times 10^{-13} \times \exp(780/T)$                                   | IUPAC                              | X |
| CH <sub>3</sub> O <sub>2</sub> + NO <sub>2</sub>                | $\xrightarrow{M}$ | CH <sub>3</sub> O <sub>2</sub> NO <sub>2</sub>                                                                                 | $k_{tro}(2.5 \times 10^{-30}, -5.5, 0, 1.8 \times 10^{-11}, 0, 0, 0.36)$   | IUPAC                              | X |
| CH <sub>3</sub> O <sub>2</sub> + NO <sub>3</sub>                | $\rightarrow$     | HCHO + HO <sub>2</sub> + NO <sub>2</sub>                                                                                       | $1.2 \times 10^{-12}$                                                      | IUPAC                              | X |
| CH <sub>3</sub> O <sub>2</sub> NO <sub>2</sub>                  | $\xrightarrow{M}$ | CH <sub>3</sub> O <sub>2</sub> + NO <sub>2</sub>                                                                               | $k_{tro}(9 \times 10^{-5}, 0, -9690, 1.1 \times 10^{16}, 0, -10560, 0.36)$ | IUPAC                              | X |
| CH <sub>3</sub> OOH + OH                                        | $\rightarrow$     | 0.6 CH <sub>3</sub> O <sub>2</sub> + 0.4 HCHO + 0.4 OH                                                                         | $5.3 \times 10^{-12} \times \exp(190/T)$                                   | MCM                                | X |
| HCHO + OH                                                       | $\rightarrow$     | HO <sub>2</sub> + CO                                                                                                           | $1.25 \times 10^{-17} \times T^2 \times \exp(615/T)$                       | IUPAC                              | X |
| HCHO + HO <sub>2</sub>                                          | $\rightarrow$     | HOCH <sub>2</sub> OO                                                                                                           | $9.7 \times 10^{-15} \times \exp(625/T)$                                   | <sup>3</sup> , IUPAC               |   |
| HCHO + NO <sub>3</sub>                                          | $\rightarrow$     | HNO <sub>3</sub> + CO + HO <sub>2</sub>                                                                                        | $5.5 \times 10^{-16}$                                                      | IUPAC                              | X |
| CO + OH                                                         | $\rightarrow$     | HO <sub>2</sub>                                                                                                                | $k_{CO}(1.44 \times 10^{-13}, 4.2 \times 10^{19})$                         | IUPAC                              | X |
| CH <sub>3</sub> OH + OH                                         | $\rightarrow$     | HCHO + HO <sub>2</sub>                                                                                                         | $6.38 \times 10^{-18} \times T^2 \times \exp(144/T)$                       | IUPAC                              | X |
| HCOOH + OH                                                      | $\rightarrow$     | HO <sub>2</sub>                                                                                                                | $4.5 \times 10^{-13}$                                                      | MCM                                | X |
| HOCH <sub>2</sub> OO                                            | $\rightarrow$     | HO <sub>2</sub> + HCHO                                                                                                         | $2.4 \times 10^{12} \times \exp(-7000/T)$                                  | <sup>3</sup> , IUPAC               |   |
| HOCH <sub>2</sub> OO + NO                                       | $\rightarrow$     | HO <sub>2</sub> + HCOOH + NO <sub>2</sub>                                                                                      | $5.6 \times 10^{-12}$                                                      | IUPAC                              | X |
| HOCH <sub>2</sub> OO + HO <sub>2</sub>                          | $\rightarrow$     | 0.5 HCOOH + 0.2 OH + 0.5 HOCH <sub>2</sub> OOH + 0.2 HO <sub>2</sub>                                                           | $5.6 \times 10^{-15} \times \exp(2300/T)$                                  | IUPAC; see text sect. 2.2          | X |
| HOCH <sub>2</sub> OO + HOCH <sub>2</sub> OO                     | $\rightarrow$     | 2 HCOOH + 2 HO <sub>2</sub>                                                                                                    | $5.5 \times 10^{-12}$                                                      | IUPAC; see text sect. 2.2          | X |
| HOCH <sub>2</sub> OOH + OH                                      | $\rightarrow$     | HOCH <sub>2</sub> OO                                                                                                           | $2.9 \times 10^{-11}$                                                      | <sup>4</sup>                       | X |

| C2 chemistry      |                     |                                                                                                 |                                                                            |                                                                      |   |
|-------------------|---------------------|-------------------------------------------------------------------------------------------------|----------------------------------------------------------------------------|----------------------------------------------------------------------|---|
| C2H2 + OH         | $\xrightarrow{M}$   | 0.636 GLY + 0.636 OH + 0.364 HCOOH + 0.364 CO + 0.364 HO2                                       | $k_{tro}(5 \times 10^{-30}, -1.5, 0, 1 \times 10^{-12}, 0, 0, 0.37)$       | MCM, IUPAC                                                           | X |
| C2H4 + OH         | $\xrightarrow{M}$   | EO2                                                                                             | $k_{tro}(8.6 \times 10^{-29}, -3.1, 0, 9 \times 10^{-12}, -0.85, 0, 0.48)$ | MCM, IUPAC                                                           | X |
| C2H4 + O3         | $\rightarrow$       | 1.168 HCHO + 0.168 H2O2 + 0.27 HO2 + 0.17 OH + 0.35 CO + 0.021 HCOOH + 0.18 H2 + 0.231 HOCH2OOH | $6.82 \times 10^{-15} \times \exp(-2500/T)$                                | IUPAC, <sup>5</sup>                                                  | 4 |
| EO2 + HO2         | $\rightarrow$       | EOOH                                                                                            | $1.3 \times 10^{-11}$                                                      | MCM, IUPAC                                                           | X |
| EOOH + OH         | $\rightarrow$       | 0.21 EO2 + 0.79 OHCCH2OH + 0.79 OH                                                              | $1.45 \times 10^{-12} \times \exp(684/T)$                                  | <sup>12</sup> , MCM                                                  | X |
| EO2 + NO          | $\rightarrow$       | EO + NO2                                                                                        | $8.7 \times 10^{-12}$                                                      | IUPAC, only dominant path                                            | X |
| EO2 + CH3O2       | $\rightarrow$       | 0.5 EO + 0.75 HCHO + 0.5 HO2 + 0.25 CH3OH + 0.25 OHCCH2OH + 0.25 CH2OHCH2OH                     | $4.0 \times 10^{-11} \times \exp(1000/T)$                                  | <sup>3</sup> ; but considering $R_{-H}O + R'OH$ and $ROH + R'_{-H}O$ | X |
| EO2 + CH3C(O)O2   | $\rightarrow$       | CH3O2 + EO                                                                                      | $1.0 \times 10^{-11}$                                                      | <sup>3</sup>                                                         |   |
| EO                | $\rightarrow$       | HO2 + HCHO + HCHO                                                                               | $1.6 \times 10^{11} \times \exp(-4150/T)$                                  | <sup>3</sup>                                                         |   |
| EO                | $\xrightarrow{O_2}$ | HO2 + OHCCH2OH                                                                                  | $1.0 \times 10^{-14}$                                                      | <sup>3</sup>                                                         |   |
| CH2OHCH2OH + OH   | $\rightarrow$       | OHCCH2OH + HO2                                                                                  | $1.45 \times 10^{-11}$                                                     | MCM                                                                  | X |
| CC + OH           | $\rightarrow$       | ETHPX                                                                                           | $1.49 \times 10^{-17} \times T^2 \times \exp(-499/T)$                      | IUPAC, MCM                                                           | X |
| ETHPX + NO        | $\rightarrow$       | CH3CHO + NO2 + HO2                                                                              | $2.55 \times 10^{-12} \times \exp(380/T)$                                  | <sup>3</sup> , IUPAC                                                 | X |
| ETHPX + HO2       | $\rightarrow$       | CCOO                                                                                            | $6.4 \times 10^{-13} \times \exp(710/T)$                                   | <sup>3</sup> , IUPAC                                                 | X |
| ETHPX + CH3O2     | $\rightarrow$       | 0.7 HCHO + 0.8 CH3CHO + HO2 + 0.3 CH3OH + 0.2 ETOH                                              | $2.0 \times 10^{-13}$                                                      | <sup>3</sup>                                                         |   |
| ETHPX + CH3C(O)O2 | $\rightarrow$       | CH3CHO + HO2 + CH3O2                                                                            | $1.8 \times 10^{-12} \times \exp(500/T)$                                   | <sup>3</sup>                                                         |   |
| ETHPX + ETHPX     | $\rightarrow$       | 1.6 CH3CHO + 1.2 HO2 + 0.4 ETOH                                                                 | $7.6 \times 10^{-14}$                                                      | <sup>3</sup>                                                         |   |
| CCOO + OH         | $\rightarrow$       | 0.5 ETHPX + 0.5 CH3CHO + 0.5 OH                                                                 | $1.94 \times 10^{-12} \times \exp(339/T)$                                  | <sup>3,12</sup>                                                      | X |
| CH3CHO + OH       | $\rightarrow$       | CH3C(O)O2                                                                                       | $4.7 \times 10^{-12} \times \exp(345/T)$                                   | <sup>3</sup> , IUPAC                                                 | X |
| CH3CHO + NO3      | $\rightarrow$       | HNO3 + CH3C(O)O2                                                                                | $1.4 \times 10^{-12} \times \exp(-1860/T)$                                 | <sup>3</sup> , IUPAC                                                 | X |
| CH3C(O)O2 + NO    | $\rightarrow$       | NO2 + CH3O2                                                                                     | $7.5 \times 10^{-12} \times \exp(290/T)$                                   | <sup>3</sup>                                                         |   |

|                         |                   |                                                                         |                                                                                  |                     |   |
|-------------------------|-------------------|-------------------------------------------------------------------------|----------------------------------------------------------------------------------|---------------------|---|
| CH3C(O)O2 + NO2         | $\xrightarrow{M}$ | PAN                                                                     | $k_{tro}(3.28 \times 10^{-28}, -6.87, 0, 1.125 \times 10^{-11}, -1.105, 0, 0.3)$ | IUPAC               | 1 |
| CH3C(O)O2 + NO3         | $\rightarrow$     | NO2 + CH3O2                                                             | $4.0 \times 10^{-12}$                                                            | MCM                 | X |
| CH3C(O)O2 + HO2         | $\rightarrow$     | 0.13 CH3COOH + 0.13 O3 + 0.37 CH3COOOH + 0.5 CH3O2 + 0.5 OH             | $1.73 \times 10^{-12} \times \exp(730/T)$                                        | IUPAC               | 2 |
| CH3C(O)O2 + CH3O2       | $\rightarrow$     | 0.9 CH3O2 + HCHO + 0.9 HO2 + 0.1 CH3COOH                                | $2.0 \times 10^{-12} \times \exp(500/T)$                                         | <sup>3</sup>        |   |
| CH3COOOH + OH           | $\rightarrow$     | CH3C(O)O2                                                               | $3.0 \times 10^{-14}$                                                            | IUPAC main path     | X |
| PAN + OH                | $\rightarrow$     | HCHO + CO + NO2                                                         | $3.0 \times 10^{-14}$                                                            | MCM                 | X |
| PAN                     | $\xrightarrow{M}$ | CH3C(O)O2 + NO2                                                         | $k_{tro}(1.1 \times 10^{-5}, 0, -10100, 1.9 \times 10^{17}, 0, -14100, 0.3)$     | IUPAC               | X |
| CH3C(O)O2 + CH3C(O)O2   | $\rightarrow$     | CH3O2 + CH3O2                                                           | $2.9 \times 10^{-12} \times \exp(500/T)$                                         | <sup>3</sup>        |   |
| OHCCH2OH + OH           | $\rightarrow$     | 0.2 GLY + 0.2 HO2 + 0.8 OCC(=O)O[O]                                     | $1.0 \times 10^{-11}$                                                            | <sup>3</sup>        |   |
| OHCCH2OH + NO3          | $\rightarrow$     | OCC(=O)O[O] + HNO3                                                      | $1.44 \times 10^{-12} \times \exp(-1862/T)$                                      | <sup>3</sup>        |   |
| OCC(=O)O[O] + HO2       | $\rightarrow$     | 0.5 HO2 + 0.5 HCHO + 0.5 OH + 0.13 CH2OHCOOH + 0.13 O3 + 0.37 OCC(=O)OO | $2.11 \times 10^{-12} \times \exp(730/T)$                                        | <sup>6</sup>        | 2 |
| OCC(=O)OO + OH          | $\rightarrow$     | OCC(=O)O[O]                                                             | $1.13 \times 10^{-12} \times \exp(497/T)$                                        | <sup>3,12</sup>     |   |
| OCC(=O)O[O] + NO        | $\rightarrow$     | NO2 + HO2 + HCHO                                                        | $7.5 \times 10^{-12} \times \exp(290/T)$                                         | MCM                 | 2 |
| OCC(=O)O[O] + NO3       | $\rightarrow$     | NO2 + HO2 + HCHO                                                        | $4.0 \times 10^{-12}$                                                            | <sup>3</sup>        |   |
| OCC(=O)O[O] + NO2       | $\xrightarrow{M}$ | OCC(=O)OON(=O)=O                                                        | $k_{tro}(3.28 \times 10^{-28}, -6.87, 0, 1.125 \times 10^{-11}, -1.105, 0, 0.3)$ | MCM                 | 1 |
| OCC(=O)OON(=O)=O + OH   | $\rightarrow$     | HCHO + CO + NO2                                                         | $1.12 \times 10^{-12}$                                                           | MCM                 | X |
| OCC(=O)OON(=O)=O        | $\xrightarrow{M}$ | OCC(=O)O[O] + NO2                                                       | $k_{tro}(1.1 \times 10^{-5}, 0, -10100, 1.9 \times 10^{17}, 0, -14100, 0.3)$     | MCM, IUPAC          | X |
| OCC(=O)O[O] + CH3O2     | $\rightarrow$     | 1.9 HCHO + 1.8 HO2 + 0.1 CH2OHCOOH                                      | $2.0 \times 10^{-12} \times \exp(500/T)$                                         | Analog to CH3C(O)O2 | 2 |
| OCC(=O)O[O] + CH3C(O)O2 | $\rightarrow$     | HCHO + HO2 + CH3O2                                                      | $2.9 \times 10^{-12} \times \exp(500/T)$                                         | Analog to CH3C(O)O2 | 2 |
| CH2OHCOOH + OH          | $\rightarrow$     | HCHO + HO2                                                              | $2.73 \times 10^{-12}$                                                           | MCM                 | X |
| GLY + OH                | $\rightarrow$     | HCOCO                                                                   | $6.6 \times 10^{-18} \times T^2 \times \exp(820/T)$                              | IUPAC               | 4 |



|                                                                                      |                     |                                                                                                                           |                                                                                  |                                                        |   |
|--------------------------------------------------------------------------------------|---------------------|---------------------------------------------------------------------------------------------------------------------------|----------------------------------------------------------------------------------|--------------------------------------------------------|---|
| GLY + NO <sub>3</sub>                                                                | →                   | HCOCO + HNO <sub>3</sub>                                                                                                  | $4.0 \times 10^{-16}$                                                            | IUPAC                                                  | 4 |
| HCOCO                                                                                | $\xrightarrow{O_2}$ | 0.12 O=CC(=O)O[O] + 0.64 OH + 1.12 CO + 0.24 HO <sub>2</sub>                                                              | $2.1 \times 10^{-11}$                                                            | MCM for T=298K                                         | 4 |
| HCOCO                                                                                | →                   | 2 CO + HO <sub>2</sub>                                                                                                    | $7 \times 10^{11} \times \exp(-3160/T)$                                          | MCM                                                    | 4 |
| O=CC(=O)O[O] + HO <sub>2</sub>                                                       | →                   | 0.13 HOOCCHO + 0.13 O <sub>3</sub> + 0.37 O=C(OO)C=O + 0.5 HO <sub>2</sub> + 0.5 CO + 0.5 OH                              | $2.11 \times 10^{-12} \times \exp(730/T)$                                        | <sup>6</sup>                                           | 2 |
| O=C(OO)C=O + OH                                                                      | →                   | O=CC(=O)O[O]                                                                                                              | $2.13 \times 10^{-11} \times \exp(600/T)$                                        | <sup>12</sup> , MCM                                    | X |
| O=CC(=O)O[O] + NO                                                                    | →                   | HO <sub>2</sub> + CO + NO <sub>2</sub>                                                                                    | $7.5 \times 10^{-12} \times \exp(290/T)$                                         | MCM                                                    | 2 |
| O=CC(=O)O[O] + NO <sub>3</sub>                                                       | →                   | HO <sub>2</sub> + CO + NO <sub>2</sub>                                                                                    | $4.0 \times 10^{-12}$                                                            | <sup>3</sup>                                           |   |
| O=CC(=O)O[O] + NO <sub>2</sub>                                                       | $\xrightarrow{M}$   | HO <sub>2</sub> + CO + NO <sub>3</sub>                                                                                    | $k_{tro}(3.28 \times 10^{-28}, -6.87, 0, 1.125 \times 10^{-11}, -1.105, 0, 0.3)$ | MCM                                                    | 1 |
| O=CC(=O)O[O] + CH <sub>3</sub> O <sub>2</sub>                                        | →                   | 0.9 CO + 1.8 HO <sub>2</sub> + HCHO + 0.1 HOOCCHO                                                                         | $2.0 \times 10^{-12} \times \exp(500/T)$                                         | Analog to CH <sub>3</sub> C(O)O <sub>2</sub>           | 2 |
| O=CC(=O)O[O] + CH <sub>3</sub> C(O)O <sub>2</sub>                                    | →                   | CO + HO <sub>2</sub> + CH <sub>3</sub> O <sub>2</sub>                                                                     | $2.9 \times 10^{-12} \times \exp(500/T)$                                         | Analog to CH <sub>3</sub> C(O)O <sub>2</sub>           | 2 |
| HOOCCHO + OH                                                                         | →                   | CO + HO <sub>2</sub>                                                                                                      | $1.81 \times 10^{-12} \times \exp(588/T)$                                        | <sup>15</sup> , MCM                                    | X |
| HCOCH <sub>2</sub> OOH + OH                                                          | →                   | 0.76 GLY + 0.76 OH + 0.24 CO + 0.24 HO <sub>2</sub> + 0.24 HCHO                                                           | $7.24 \times 10^{-12} \times \exp(178/T)$                                        | <sup>12</sup> , MCM                                    | X |
| CH <sub>3</sub> COOH + OH                                                            | →                   | CH <sub>3</sub> O <sub>2</sub>                                                                                            | $8.4 \times 10^{-20} \times T^2 \times \exp(1356/T)$                             | IUPAC, MCM                                             | X |
| ETOH + OH                                                                            | →                   | 0.95 CH <sub>3</sub> CHO + 0.95 HO <sub>2</sub> + 0.05 EO <sub>2</sub>                                                    | $6.7 \times 10^{-18} \times T^2 \times \exp(511/T)$                              | IUPAC, MCM                                             | X |
| ETHLN + OH                                                                           | →                   | NO <sub>3</sub> CH <sub>2</sub> CO <sub>3</sub>                                                                           | $3.4 \times 10^{-12}$                                                            | <sup>1</sup>                                           | X |
| ETHLN + NO <sub>3</sub>                                                              | →                   | NO <sub>3</sub> CH <sub>2</sub> CO <sub>3</sub> + HNO <sub>3</sub>                                                        | $1.4 \times 10^{-12} \times \exp(-1860/T)$                                       | <sup>1</sup>                                           | X |
| NO <sub>3</sub> CH <sub>2</sub> CO <sub>3</sub> + NO                                 | →                   | HCHO + 2 NO <sub>2</sub>                                                                                                  | $7.5 \times 10^{-12} \times \exp(920/T)$                                         | <sup>1</sup>                                           | X |
| NO <sub>3</sub> CH <sub>2</sub> CO <sub>3</sub> + NO <sub>3</sub>                    | →                   | HCHO + 2 NO <sub>2</sub>                                                                                                  | $4.0 \times 10^{-12}$                                                            | <sup>1</sup>                                           | X |
| NO <sub>3</sub> CH <sub>2</sub> CO <sub>3</sub> + NO <sub>2</sub>                    | $\xrightarrow{M}$   | NO <sub>3</sub> CH <sub>2</sub> PAN                                                                                       | $k_{tro}(3.28 \times 10^{-28}, -6.87, 0, 1.125 \times 10^{-11}, -1.105, 0, 0.3)$ | MCM                                                    | 1 |
| NO <sub>3</sub> CH <sub>2</sub> CO <sub>3</sub> + HO <sub>2</sub>                    | →                   | 0.63 HCHO + 0.63 NO <sub>2</sub> + 0.37 OH + 0.13 O <sub>3</sub> + 0.37 NO <sub>3</sub> CH <sub>2</sub> CO <sub>3</sub> H | $2.8 \times 10^{-12} \times \exp(730/T)$                                         | <sup>6</sup>                                           | X |
| NO <sub>3</sub> CH <sub>2</sub> CO <sub>3</sub> + CH <sub>3</sub> O <sub>2</sub>     | →                   | 2 HCHO + NO <sub>2</sub> + 0.9 HO <sub>2</sub>                                                                            | $2.0 \times 10^{-12} \times \exp(500/T)$                                         | Analog to CH <sub>3</sub> C(O)O <sub>2</sub> chemistry | X |
| NO <sub>3</sub> CH <sub>2</sub> CO <sub>3</sub> + CH <sub>3</sub> C(O)O <sub>2</sub> | →                   | HCHO + 2 NO <sub>2</sub> + CH <sub>3</sub> O <sub>2</sub>                                                                 | $2.9 \times 10^{-12} \times \exp(500/T)$                                         | Analog to CH <sub>3</sub> C(O)O <sub>2</sub> chemistry | X |
| NO <sub>3</sub> CH <sub>2</sub> CO <sub>3</sub> H + OH                               | →                   | NO <sub>3</sub> CH <sub>2</sub> CO <sub>3</sub>                                                                           | $3.63 \times 10^{-12}$                                                           | <sup>1</sup>                                           | X |

|                |                   |                   |                                                                              |     |   |
|----------------|-------------------|-------------------|------------------------------------------------------------------------------|-----|---|
| NO3CH2PAN      | $\xrightarrow{M}$ | NO3CH2CO3 + NO2   | $k_{tro}(1.1 \times 10^{-5}, 0, -10100, 1.9 \times 10^{17}, 0, -14100, 0.3)$ | MCM | X |
| NO3CH2PAN + OH | $\rightarrow$     | HCHO + CO + 2 NO2 | $1.12 \times 10^{-14}$                                                       | MCM | X |

|                           |                   |                                                                                                                                                                                           |                                                                      |                                           |   |
|---------------------------|-------------------|-------------------------------------------------------------------------------------------------------------------------------------------------------------------------------------------|----------------------------------------------------------------------|-------------------------------------------|---|
| C3 chemistry              |                   |                                                                                                                                                                                           |                                                                      |                                           |   |
| C3H6 + OH                 | $\xrightarrow{M}$ | PO2                                                                                                                                                                                       | $k_{tro}(8 \times 10^{-27}, -3.5, 0, 3 \times 10^{-11}, -1, 0, 0.5)$ | <sup>3</sup> , IUPAC                      |   |
| C3H6 + O3                 | $\rightarrow$     | 1.02384 HCHO + 0.3246 OH + 0.432 CH3CHO + 0.523 CO + 0.4426 HO2 + 0.0684 H2 + 0.08778 HOCH2OOH + 0.11584 H2O2 + 0.00798 HCOOH + 0.1 C + 0.05 CH3OH + 0.0715 CH3CH(OH)OOH + 0.0065 CH3COOH | $5.77 \times 10^{-15} \times \exp(-1880/T)$                          | <sup>5</sup>                              | 4 |
| C3H6 + NO3                | $\rightarrow$     | PRONO3BO2                                                                                                                                                                                 | $4.6 \times 10^{-13} \times \exp(-1156/T)$                           | <sup>3</sup>                              |   |
| CH3CH(OH)OOH + OH         | $\rightarrow$     | CH3CH(OH)OO                                                                                                                                                                               | $2.8 \times 10^{-11}$                                                | <sup>2</sup> for T=298                    | X |
| CH3CH(OH)OO               | $\rightarrow$     | HO2 + CH3CHO                                                                                                                                                                              | $2.4 \times 10^{12} \times \exp(-7000/T)$                            | Analog to HOCH2OO                         | X |
| CH3CH(OH)OO + NO          | $\rightarrow$     | CH3O2 + HCOOH + NO2                                                                                                                                                                       | $5.6 \times 10^{-12}$                                                | Analog to HOCH2OO                         | X |
| CH3CH(OH)OO + HO2         | $\rightarrow$     | 0.3 CH3COOH + 0.2 OH + 0.2 HCOOH + 0.2 CH3O2 + 0.5 CH3CH(OH)OOH                                                                                                                           | $5.6 \times 10^{-15} \times \exp(2300/T)$                            | Analog to HOCH2OO                         | X |
| CH3CH(OH)OO + CH3CH(OH)OO | $\rightarrow$     | 2 HCOOH + 2 CH3O2                                                                                                                                                                         | $5.5 \times 10^{-12}$                                                | Analog to HOCH2OO                         | X |
| PO2 + NO                  | $\rightarrow$     | CH3CHO + HCHO + HO2 + NO2                                                                                                                                                                 | $8 \times 10^{-12}$                                                  | <sup>3</sup>                              |   |
| PO2 + NO3                 | $\rightarrow$     | CH3CHO + HCHO + HO2 + NO2                                                                                                                                                                 | $2.3 \times 10^{-12}$                                                | MCM                                       | X |
| PO2 + HO2                 | $\rightarrow$     | POOH                                                                                                                                                                                      | $7.5 \times 10^{-13} \times \exp(700/T)$                             | <sup>3</sup>                              |   |
| PO2 + CH3O2               | $\rightarrow$     | 0.5 CH3CHO + 1.25 HCHO + HO2 + 0.5 CH3COCH2OH + 0.25 CH3OH                                                                                                                                | $8.3 \times 10^{-13}$                                                | <sup>3</sup>                              |   |
| PO2 + CH3C(O)O2           | $\rightarrow$     | CH3CHO + HCHO + HO2 + CH3O2                                                                                                                                                               | $1.0 \times 10^{-11}$                                                | <sup>3</sup>                              |   |
| POOH + OH                 | $\rightarrow$     | 0.14 PO2 + 0.86 OH + 0.86 CH3COCH2OH                                                                                                                                                      | $7.24 \times 10^{-13} \times \exp(1011/T)$                           | <sup>3,12</sup>                           | X |
| CCC + OH                  | $\rightarrow$     | PROPPX                                                                                                                                                                                    | $1.65 \times 7 \times T^2 \times \exp(-87/T)$                        | <sup>3</sup> , IUPAC                      | X |
| PROPPX + NO               | $\rightarrow$     | 0.727 CH3COCH3 + NO2 + HO2 + 0.4095 CH3CHO                                                                                                                                                | $2.7 \times 10^{-12} \times \exp(360/T)$                             | MCM (main path), ratios based on CCC + OH | X |

|                         |   |                                                                            |                                              |                                                                                                        |   |
|-------------------------|---|----------------------------------------------------------------------------|----------------------------------------------|--------------------------------------------------------------------------------------------------------|---|
| PROPPX + HO2            | → | PROPOOH                                                                    | $7.5 \times 10^{-13} \times \exp(700/T)$     | distribution, C <sub>2</sub> H <sub>5</sub> CHO approximated with 1.5 CH <sub>3</sub> CHO <sup>3</sup> |   |
| PROPPX + CH3O2          | → | HCHO + 2 HO2 + 0.727 CH3COCH3 + 0.4095 CH3CHO                              | $3.75 \times 10^{-13} \times \exp(-40/T)$    | <sup>3</sup> , yields adopted from NO reaction                                                         | X |
| PROPPX + CH3C(O)O2      | → | CH3O2 + HO2 + 0.727 CH3COCH3 + 0.4095 CH3CHO                               | $1.0 \times 10^{-11}$                        | <sup>3</sup> , yields adopted from NO reaction                                                         | X |
| PROPOOH + OH            | → | 0.26 PROPPX + 0.55 CH3COCH3 + 0.74 OH + 0.285 CH3CHO                       | $2.27 \times 10^{-12} \times \exp(493/T)$    | <sup>12</sup> , MCM                                                                                    | X |
| CH3COCH3 + OH           | → | CC(=O)CO[O]                                                                | $8.8 \times 10^{-12} \times \exp(-1320/T)$   | MCM                                                                                                    | X |
| CH3COCH3 + OH           | → | CC(=O)CO[O]                                                                | $1.7 \times 10^{-14} \times \exp(423/T)$     | MCM                                                                                                    | X |
| CC(=O)CO[O] + NO        | → | CH3C(O)O2 + HCHO + NO2                                                     | $2.9 \times 10^{-12} \times \exp(300/T)$     | <sup>3</sup> , IUPAC, MCM                                                                              |   |
| CC(=O)CO[O] + NO3       | → | CH3C(O)O2 + HCHO + NO2                                                     | $2.3 \times 10^{-12}$                        | MCM                                                                                                    | X |
| CC(=O)CO[O] + HO2       | → | 0.15 CH3C(O)O2 + 0.15 HCHO + 0.15 OH + 0.85 CC(=O)COO                      | $1.36 \times 10^{-13} \times \exp(1250/T)$   | MCM                                                                                                    | X |
| CC(=O)CO[O] + CH3O2     | → | 0.3 CH3C(O)O2 + 0.2 CH3COCH2OH + 0.8 HCHO + 0.5 CH3OH + 0.3 HO2 + 0.5 MGLY | $3.8 \times 10^{-12}$                        | IUPAC                                                                                                  | X |
| CC(=O)CO[O] + CH3C(O)O2 | → | 0.5 CH3COOH + 0.5 MGLY + 0.5 CH3O2 + 0.5 CH3C(O)O2 + 0.5 HCHO              | $5.0 \times 10^{-12}$                        | IUPAC                                                                                                  | X |
| CC(=O)COO + OH          | → | 0.52 CC(=O)CO[O] + 0.48 MGLY + 0.48 OH                                     | $1.12 \times 10^{-12} \times \exp(500/T)$    | <sup>12</sup> , MCM                                                                                    | X |
| CH3COCO2H + OH          | → | CH3C(O)O2                                                                  | $4.9 \times 10^{-14} \times \exp(280/T)$     | IUPAC, MCM                                                                                             | X |
| MGLY + OH               | → | CH3C(O)O2 + CO                                                             | $1.9 \times 10^{-12} \times \exp(575/T)$     | MCM                                                                                                    | X |
| MGLY + NO3              | → | CH3C(O)O2 + CO + HNO3                                                      | $5.0 \times 10^{-16}$                        | IUPAC, MCM                                                                                             | X |
| CH3COCH2OH + OH         | → | MGLY + HO2                                                                 | $1.083 \times 10^{-12} \times \exp(307/T)$   | <sup>12</sup> , MCM                                                                                    | X |
| PRONO3BO2 + NO          | → | 0.83 HO2 + 0.83 NOA + 0.17 HCHO + 0.17 CH3CHO + 1.17 NO2                   | $2.7 \times 10^{-12} \times \exp(360/T)$     | <sup>3</sup> , MCM                                                                                     | X |
| PRONO3BO2 + NO3         | → | 0.83 HO2 + 0.83 NOA + 0.17 HCHO + 0.17 CH3CHO + 1.17 NO2                   | $2.3 \times 10^{-12}$                        | <sup>3</sup> , MCM                                                                                     | X |
| PRONO3BO2 + HO2         | → | PR2O2HNO3                                                                  | $1.5132 \times 10^{-13} \times \exp(1300/T)$ | <sup>3</sup> , MCM                                                                                     | X |
| PRONO3BO2 + CH3O2       | → | 0.915 HO2 + 0.915 NOA + 0.835 HCHO + 0.085 CH3CHO + 0.25 CH3OH + 0.085 NO2 | $1.0 \times 10^{-12}$                        | <sup>3</sup> added NO2                                                                                 | X |
| PRONO3BO2 + CH3C(O)O2   | → | 0.83 HO2 + 0.83 NOA + 0.17 HCHO + 0.17 CH3CHO + 0.17 NO2 + CH3O2           | $1.0 \times 10^{-11}$                        | <sup>3</sup>                                                                                           |   |

|                       |                            |                                             |                                                                                  |                     |   |
|-----------------------|----------------------------|---------------------------------------------|----------------------------------------------------------------------------------|---------------------|---|
| PR2O2HNO3 + OH        | →                          | 0.5 PRONO3BO2 + 0.5 NOA + 0.5 OH            | $7.0 \times 10^{-12}$                                                            | <sup>3</sup>        |   |
| NOA + OH              | →                          | MGLY + NO2                                  | $8.24 \times 10^{-13} \times \exp(-351/T)$                                       | <sup>3,12</sup>     | X |
| HCOCOHCO3 + HO2       | →                          | 0.5 HO2 + 0.5 OH + 0.5 GLY + 0.5 HCOCOHCO3H | $2.62 \times 10^{-12} \times \exp(730/T)$                                        | <sup>6</sup> , MCM  | X |
| HCOCOHCO3 + NO        | →                          | HO2 + GLY + NO2                             | $7.5 \times 10^{-12} \times \exp(290/T)$                                         | MCM                 | X |
| HCOCOHCO3 + NO2       | $\overset{M}{\rightarrow}$ | HCOCOHPAN                                   | $k_{tro}(3.28 \times 10^{-28}, -6.87, 0, 1.125 \times 10^{-11}, -1.105, 0, 0.3)$ | MCM                 | 1 |
| HCOCOHCO3 + NO3       | →                          | HO2 + GLY + NO2                             | $4.0 \times 10^{-12}$                                                            | MCM                 | X |
| HCOCOHCO3 + CH3O2     | →                          | HCHO + 2 HO2 + GLY                          | $2.0 \times 10^{-12} \times \exp(500/T)$                                         | Analog to CH3C(O)O2 | X |
| HCOCOHCO3 + CH3C(O)O2 | →                          | HO2 + GLY + CH3O2                           | $2.9 \times 10^{-12} \times \exp(500/T)$                                         | Analog to CH3C(O)O2 | X |
| HCOCOHCO3H + OH       | →                          | HCOCOHCO3                                   | $5.44 \times 10^{-12} \times \exp(406/T)$                                        | <sup>12</sup> , MCM | X |
| HCOCOHPAN + OH        | →                          | GLY + CO + NO2                              | $6.97 \times 10^{-11}$                                                           | MCM                 | X |
| HCOCOHPAN             | $\overset{M}{\rightarrow}$ | HCOCOHCO3 + NO2                             | $k_{tro}(1.1 \times 10^{-5}, 0, -10100, 1.9 \times 10^{17}, 0, -14100, 0.3)$     | MCM                 | X |
| C33CO + OH            | →                          | 3 CO + HO2                                  | $3.55 \times 10^{-12} \times \exp(591/T)$                                        | <sup>12</sup> , MCM | X |

| C4 chemistry      |   |                                                                             |                                          |                                                                                                             |   |
|-------------------|---|-----------------------------------------------------------------------------|------------------------------------------|-------------------------------------------------------------------------------------------------------------|---|
| BIGENE + OH       | → | ENE02                                                                       | $5.4 \times 10^{-11}$                    | <sup>3</sup>                                                                                                |   |
| ENE02 + NO        | → | CH3CHO + 0.5 HCHO + 0.5 CH3COCH3 + HO2 + NO2                                | $4.2 \times 10^{-12} \times \exp(180/T)$ | <sup>3</sup>                                                                                                |   |
| ENE02 + HO2       | → | 1.333 POOH                                                                  | $7.5 \times 10^{-13} \times \exp(700/T)$ | <sup>3</sup>                                                                                                |   |
| ENE02 + CH3O2     | → | 0.665 CH3COCH2OH + 0.5 CH3OH + 0.5 CH3CHO + 0.25 CH3COCH3 + 0.75 HCHO + HO2 | $1.0 \times 10^{-12}$                    | <sup>3</sup>                                                                                                |   |
| ENE02 + CH3C(O)O2 | → | CH3CHO + 0.5 HCHO + 0.5 CH3COCH3 + HO2 + CH3O2                              | $1.0 \times 10^{-11}$                    | <sup>3</sup>                                                                                                |   |
| MEK + OH          | → | 0.294 MEKAO2 + 0.62 MEKBO2 + 0.086 MEKCO2                                   | $1.5 \times 10^{-12} \times \exp(-90/T)$ | <sup>12</sup> , IUPAC, MCM                                                                                  | X |
| MEKAO2 + NO3      | → | NO2 + 0.5 HCHO + 0.5 HO2 + 0.5 CO2C3CHO + 0.5 EO2                           | $2.3 \times 10^{-12}$                    | MCM                                                                                                         | X |
| MEKBO2 + NO3      | → | CH3CHO + CH3C(O)O2 + NO2                                                    | $2.3 \times 10^{-12}$                    | MCM                                                                                                         | X |
| MEKCO2 + NO3      | → | NO2 + HCHO + 1.5 CH3C(O)O2                                                  | $2.3 \times 10^{-12}$                    | MCM, C <sub>2</sub> H <sub>5</sub> CO <sub>3</sub> approximated with 1.5 CH <sub>3</sub> C(O)O <sub>2</sub> | X |

|                    |                                                                                       |                                               |                                                                                                                                                                     |   |
|--------------------|---------------------------------------------------------------------------------------|-----------------------------------------------|---------------------------------------------------------------------------------------------------------------------------------------------------------------------|---|
| MEKAO2 + NO        | → 0.967 NO2 + 0.4835 HCHO + 0.4835 HO2 + 0.4835 CO2C3CHO + 0.4835 EO2 + 0.033 MEKANO3 | $2.7 \times 10^{-12} \times \exp(360/T)$      | MCM                                                                                                                                                                 | X |
| MEKBO2 + NO        | → CH3CHO + CH3C(O)O2 + NO2                                                            | $2.7 \times 10^{-12} \times \exp(360/T)$      | MCM                                                                                                                                                                 | X |
| MEKCO2 + NO        | → NO2 + HCHO + 1.5 CH3C(O)O2                                                          | $2.7 \times 10^{-12} \times \exp(360/T)$      | MCM, C <sub>2</sub> H <sub>5</sub> CO <sub>3</sub><br>approximated with 1.5<br>CH <sub>3</sub> C(O)O <sub>2</sub>                                                   | X |
| MEKANO3 + OH       | → NO2 + CO2C3CHO                                                                      | $1.5 \times 10^{-12}$                         | <sup>12</sup> , MCM                                                                                                                                                 | X |
| MEKAO2 + HO2       | → MEKAOOH                                                                             | $1.81875 \times 10^{-13} \times \exp(1300/T)$ | MCM                                                                                                                                                                 | X |
| MEKBO2 + HO2       | → MEKBOOH                                                                             | $1.81875 \times 10^{-13} \times \exp(1300/T)$ | MCM                                                                                                                                                                 | X |
| MEKCO2 + HO2       | → MEKCOOH                                                                             | $1.81875 \times 10^{-13} \times \exp(1300/T)$ | MCM                                                                                                                                                                 | X |
| MEKAOOH + OH       | → OH + CO2C3CHO                                                                       | $1.1 \times 10^{-13} \times \exp(1359/T)$     | <sup>12</sup> , MCM                                                                                                                                                 | X |
| MEKAOOH + OH       | → MEKAO2                                                                              | $0.368 \times 10^{-12} \times \exp(635/T)$    | <sup>12</sup> , MCM                                                                                                                                                 | X |
| MEKBOOH + OH       | → OH + 2 CH3C(O)O2                                                                    | $6.08 \times 10^{-13} \times \exp(678/T)$     | <sup>12</sup> , MCM                                                                                                                                                 | X |
| MEKBOOH + OH       | → MEKBO2                                                                              | $0.368 \times 10^{-12} \times \exp(635/T)$    | <sup>12</sup> , MCM                                                                                                                                                 | X |
| MEKCOOH + OH       | → CO + 1.33 MGLY                                                                      | $1.46 \times 10^{-12} \times \exp(298/T)$     | <sup>12</sup> , MCM; EGLYOX<br>approximated with 1.33<br>MGLY                                                                                                       | X |
| MEKCOOH + OH       | → MEKCO2                                                                              | $0.368 \times 10^{-12} \times \exp(635/T)$    | <sup>12</sup> , MCM                                                                                                                                                 | X |
| MEKAO2 + CH3O2     | → 0.2 CH3OH + 0.6 HO2 + 0.8 HCHO + 0.2 MEKAOH + 0.5 CO2C3CHO + 0.3 HCHO + 0.3 EO2     | $1.0 \times 10^{-12}$                         | RO <sub>2</sub> chemistry                                                                                                                                           | X |
| MEKBO2 + CH3O2     | → 0.2 CH3OH + 0.6 HO2 + 0.2 MEKBOH + 0.8 HCHO + CH3C(O)O2 + 0.6 CH3CHO                | $1.0 \times 10^{-12}$                         | RO <sub>2</sub> chemistry                                                                                                                                           | X |
| MEKCO2 + CH3O2     | → 0.5 CH3OH + 0.3 HO2 + 0.2 MEKCOH + 0.8 HCHO + 0.67 MGLY + 0.45 CH3C(O)O2            | $3.8 \times 10^{-12}$                         | Analog to CC(=O)CO[O],<br>EGLYOX approximated<br>with 1.33 MGLY and<br>C <sub>2</sub> H <sub>5</sub> CO <sub>3</sub> with 1.5<br>CH <sub>3</sub> C(O)O <sub>2</sub> | X |
| MEKAO2 + CH3C(O)O2 | → 0.4 EO2 + 0.4 HCHO + 0.6 CO2C3CHO + 0.4 HO2 + 0.8 CH3O2 + 0.2 CH3COOH               | $1.0 \times 10^{-11}$                         | RO <sub>2</sub> chemistry                                                                                                                                           | X |
| MEKBO2 + CH3C(O)O2 | → 0.8 CH3CHO + 1.2 CH3C(O)O2 + 0.8 CH3O2 + 0.2 CH3COOH                                | $1.0 \times 10^{-11}$                         | RO <sub>2</sub> chemistry                                                                                                                                           | X |
| MEKCO2 + CH3C(O)O2 | → 0.5 HCHO + 0.75 CH3C(O)O2 + 0.67 MGLY + 0.5 CH3O2 + 0.5 CH3COOH                     | $5.0 \times 10^{-12}$                         | Analog to CC(=O)CO[O],<br>EGLYOX approximated                                                                                                                       | X |

|                 |                   |                                                                                                         |                                                                                  |                                                                                                                                  |   |
|-----------------|-------------------|---------------------------------------------------------------------------------------------------------|----------------------------------------------------------------------------------|----------------------------------------------------------------------------------------------------------------------------------|---|
| MEKAOH + OH     | →                 | HO2 + CO2C3CHO                                                                                          | $1.334 \times 10^{-13} \times \exp(1334/T)$                                      | with 1.33 MGLY and C <sub>2</sub> H <sub>5</sub> CO <sub>3</sub> with 1.5 CH <sub>3</sub> C(O)O <sub>2</sub> <sup>12</sup> , MCM | X |
| MEKBOH + OH     | →                 | HO2 + 2 CH3C(O)O2                                                                                       | $7.3 \times 10^{-13} \times \exp(628/T)$                                         | <sup>12</sup> , MCM                                                                                                              | X |
| MEKCOH + OH     | →                 | HO2 + 1.33 MGLY                                                                                         | $1.66 \times 10^{-12} \times \exp(270/T)$                                        | <sup>12</sup> , MCM, EGLYOX approximated with 1.33 MGLY                                                                          | X |
| CO2C3CHO + NO3  | →                 | CC(=O)CO[O] + HNO3                                                                                      | $5.76 \times 10^{-12} \times \exp(-1862/T)$                                      | MCM                                                                                                                              | X |
| CO2C3CHO + OH   | →                 | CC(=O)CO[O]                                                                                             | $5.57 \times 10^{-12} \times \exp(-405/T)$                                       | <sup>12</sup> , MCM                                                                                                              | X |
| MACR + O3       | →                 | 0.88 MGLY + 0.12 CH3C(O)O2 + 0.12 CO + 0.12 OH + 0.044 HCOOH + 0.472 HCHO + 0.352 H2O2 + 0.484 HOCH2OOH | $1.4 \times 10^{-15} \times \exp(-2100/T)$                                       | <sup>1</sup>                                                                                                                     | 5 |
| MACR + OH       | →                 | 0.964 MACRO2 + 0.036 CC(=O)COO + 0.036 CO + 0.036 HO2                                                   | $4.4 \times 10^{-12} \times \exp(380/T)$                                         | <sup>1</sup>                                                                                                                     | 5 |
| MACR + OH       | →                 | MCO3                                                                                                    | $2.7 \times 10^{-12} \times \exp(470/T)$                                         | <sup>1</sup>                                                                                                                     | 5 |
| MACR + NO3      | →                 | 0.32 HNO3 + 0.32 MCO3 + 0.68 OH + 0.68 CO + 0.68 NOA                                                    | $1.8 \times 10^{-13} \times \exp(-1190/T)$                                       | <sup>1</sup>                                                                                                                     | 5 |
| MACRO2 + NO     | →                 | 0.03 MACR2N3OH + 0.97 NO2 + 0.8342 CO + 0.8342 CH3COCH2OH + 0.1358 HCHO + 0.1358 MGLY + 0.8342 HO2      | $2.7 \times 10^{-12} \times \exp(360/T)$                                         | <sup>1</sup>                                                                                                                     | 5 |
| MACRO2 + NO3    | →                 | NO2 + 0.85 CO + 0.85 CH3COCH2OH + 0.15 HCHO + 0.15 MGLY + HO2                                           | $2.3 \times 10^{-12}$                                                            | MCM                                                                                                                              | 5 |
| MACRN + OH      | →                 | NOA + OH                                                                                                | $2.7 \times 10^{-12} \times \exp(470/T)$                                         | <sup>1</sup>                                                                                                                     | 5 |
| MACR2N3OH + OH  | →                 | MACRNO2                                                                                                 | $1.39 \times 10^{-11} \times \exp(380/T)$                                        | <sup>1</sup>                                                                                                                     | X |
| MACRNO2 + HO2   | →                 | 0.63 CH3COCH2OH + 0.37 OH + 0.63 NO2 + 0.13 O3 + 0.37 MACR2NOOH                                         | $3.14 \times 10^{-12} \times \exp(580/T)$                                        | <sup>1, 6</sup>                                                                                                                  | X |
| MACR2NOOH + OH  | →                 | MACRNO2                                                                                                 | $4.42 \times 10^{-12}$                                                           | <sup>1</sup>                                                                                                                     | X |
| MACRNO2 + NO    | →                 | CH3COCH2OH + 2NO2                                                                                       | $7.5 \times 10^{-12} \times \exp(290/T)$                                         | <sup>1</sup>                                                                                                                     | X |
| MACRNO2 + NO3   | →                 | CH3COCH2OH + 2NO2                                                                                       | $4.0 \times 10^{-12}$                                                            | <sup>1</sup>                                                                                                                     | X |
| MACRNO2 + NO2   | <sup>M</sup><br>→ | MPAN + NO2                                                                                              | $k_{tro}(3.28 \times 10^{-28}, -6.87, 0, 1.125 \times 10^{-11}, -1.105, 0, 0.3)$ | <sup>1</sup> (mini)                                                                                                              | 1 |
| MACRNO2 + CH3O2 | →                 | CH3COCH2OH + NO2 + 0.7 HO2 + HCHO                                                                       | $2.9 \times 10^{-12} \times \exp(500/T)$                                         | <sup>1</sup> , CH3C(O)O2 chemistry                                                                                               | X |
| MACRO2 + HO2    | →                 | 0.41 MACROOH + 0.507 CO + 0.507 CH3COCH2OH + 0.507 HO2 + 0.59 OH + 0.083 HCHO + 0.083 MGLY              | $2.12 \times 10^{-13} \times \exp(1300/T)$                                       | <sup>1</sup> , CH3C(O)O2 chemistry                                                                                               | 5 |

|                    |                   |                                                                                                                                    |                                                                                  |                     |   |
|--------------------|-------------------|------------------------------------------------------------------------------------------------------------------------------------|----------------------------------------------------------------------------------|---------------------|---|
| MACROOH + OH       | →                 | CH3COCH2OH + OH + CO                                                                                                               | $3.77 \times 10^{-11}$                                                           | MCM                 | 5 |
| MACRO2 + CH3O2     | →                 | 0.75 CO + 0.75 CH3COCH2OH + HCHO + 1.5 HO2 + 0.25 MACROH                                                                           | $9.2 \times 10^{-14}$                                                            | <sup>3</sup>        |   |
| MACROH + OH        | →                 | 0.16 C3MDIALOH + HO2 + 0.21 CH3COCH2OH + 0.84 CO + 0.63 OH + 0.63 CH3C(O)O2                                                        | $2.4 \times 10^{-11} \times \exp(70/T)$                                          | <sup>1</sup>        | 5 |
| MVKOH + OH         | →                 | 0.4 CO2C3CHO + 0.6 BIACETOH + HO2                                                                                                  | $8.7 \times 10^{-12} \times \exp(70/T)$                                          | <sup>1</sup>        | 5 |
| MACRO2 + CH3C(O)O2 | →                 | 0.85 CO + 0.85 CH3COCH2OH + 0.15 HCHO + 0.15 MGLY + HO2 + CH3O2                                                                    | $1.0 \times 10^{-11}$                                                            | <sup>3</sup>        |   |
| MACRO2             | →                 | CO + CH3COCH2OH + OH                                                                                                               | $2.9 \times 10^7 \times \exp(-5297/T)$                                           | <sup>1</sup>        | 5 |
| MCO3 + NO          | →                 | NO2 + HCHO + 0.35 CH3C(O)O2 + 0.65 CH3O2 + 0.65 CO                                                                                 | $8.7 \times 10^{-12} \times \exp(290/T)$                                         | <sup>1</sup>        | 5 |
| MCO3 + NO3         | →                 | NO2 + HCHO + 0.35 CH3C(O)O2 + 0.65 CH3O2 + 0.65 CO                                                                                 | $4.0 \times 10^{-12}$                                                            | <sup>3</sup>        |   |
| MCO3 + HO2         | →                 | 0.37 MACO3H + 0.13 O3 + 0.13 MACO2H + 0.5 OH + 0.5 HCHO + 0.325 CH3O2 + 0.325 CO + 0.175 CH3C(O)O2                                 | $2.39 \times 10^{-12} \times \exp(730/T)$                                        | <sup>1, 6</sup>     | 2 |
| MCO3 + CH3O2       | →                 | 0.1 MACO2H + 1.9 HCHO + 0.9 HO2 + 0.315 CH3C(O)O2 + 0.585 CH3O2 + 0.585 CO                                                         | $2.0 \times 10^{-12} \times \exp(500/T)$                                         | Analog to CH3C(O)O2 | 2 |
| MCO3 + CH3C(O)O2   | →                 | HCHO + 0.35 CH3C(O)O2 + 1.65 CH3O2 + 0.65 CO                                                                                       | $2.9 \times 10^{-12} \times \exp(500/T)$                                         | Analog to CH3C(O)O2 | 2 |
| MCO3 + NO2         | <sup>M</sup><br>→ | MPAN                                                                                                                               | $k_{tro}(3.28 \times 10^{-28}, -6.87, 0, 1.125 \times 10^{-11}, -1.105, 0, 0.3)$ | MCM                 | 1 |
| MPAN               | →                 | MCO3 + NO2                                                                                                                         | $1.58 \times 10^{16} \times \exp(-13500/T)$                                      | <sup>1</sup>        | 5 |
| MPAN + OH          | →                 | 0.25 CH3COCH2OH + NO3 + 0.25 CO + 0.75 HMML                                                                                        | $2.9 \times 10^{-11}$                                                            | <sup>1</sup>        | 5 |
| MPAN + O3          | →                 | HCHO + CH3C(O)O2 + NO3                                                                                                             | $8.2 \times 10^{-18}$                                                            | MCM                 | 5 |
| MACO2H + OH        | →                 | HCHO + CH3C(O)O2                                                                                                                   | $1.51 \times 10^{-11}$                                                           | <sup>3</sup>        |   |
| MACO3H + OH        | →                 | 0.212 MCO3 + 0.134 HMML + 0.654 CH3COCH2OH + 0.654 CO + 0.788 OH                                                                   | $1.66 \times 10^{-11}$                                                           | MCM                 | 5 |
| HMML + OH          | →                 | 0.3 CH3C(O)O2 + 0.3 HCOOH + 0.7 OH + 0.7 MGLY                                                                                      | $4.33 \times 10^{-12}$                                                           | <sup>1</sup>        | 5 |
| MVK + O3           | →                 | 0.545 MGLY + 0.38 CH3C(O)O2 + 0.1 HO2 + 0.08 OH + 0.18 CO + 0.075 CH3COCO2H + 0.8 HCHO + 0.245 H2O2 + 0.275 HOCH2OOH + 0.025 HCOOH | $8.5 \times 10^{-16} \times \exp(-1520/T)$                                       | <sup>1, 7</sup>     | 5 |
| MVK + OH           | →                 | LHMVKABO2                                                                                                                          | $2.6 \times 10^{-12} \times \exp(610/T)$                                         | <sup>1</sup>        | 5 |
| LHMVKABO2 + NO     | →                 | 0.04 MVKN + 0.96 NO2 + 0.23232 HCHO + 0.23232 MGLY + 0.23232 HO2 + 0.72768 CH3C(O)O2 + 0.72768 OHCCH2OH                            | $2.7 \times 10^{-12} \times \exp(360/T)$                                         | <sup>1</sup> (mini) | 5 |

|                       |                            |                                                                                                                               |                                                                                  |                                                            |   |
|-----------------------|----------------------------|-------------------------------------------------------------------------------------------------------------------------------|----------------------------------------------------------------------------------|------------------------------------------------------------|---|
| MVKN + OH             | →                          | 0.449 MGLY + 0.449 HCOOH + 0.69 NO3 + 0.241 HCHO + 0.241 CH3COCO2H + 0.29 CO2H3CHO + 0.31 NO2 + 0.04 MCO3 + 0.02 OH           | $1.24 \times 10^{-12} \times \exp(380/T)$                                        | <sup>1</sup> (mini)                                        | 5 |
| LHMVKABO2 + NO3       | →                          | NO2 + 0.242 HCHO + 0.242 MGLY + 0.242 HO2 + 0.758 CH3C(O)O2 + 0.758 OHCCH2OH                                                  | $2.5 \times 10^{-12}$                                                            | MCM                                                        | 5 |
| LHMVKABO2 + HO2       | →                          | 0.335 LHMVKABOOH + 0.36 CH3C(O)O2 + 0.665 OH + 0.36 OHCCH2OH + 0.305 HO2 + 0.05 MGLY + 0.05 HCHO + 0.255 BIACETOH             | $2.12 \times 10^{-13} \times \exp(1300/T)$                                       | <sup>1</sup> (mini)                                        | 5 |
| LHMVKABOOH + OH       | →                          | OH + 0.53 BIACETOH + 0.47 CO2H3CHO                                                                                            | $5.77 \times 10^{-11}$                                                           | <sup>1</sup> (mini)                                        | 5 |
| LHMVKABO2 + CH3O2     | →                          | 0.9 HCHO + 0.35 OHCCH2OH + 0.65 HO2 + 0.35 CH3C(O)O2 + 0.175 BIACETOH + 0.25 CH3OH + 0.25 MACROH + 0.25 MGLY + 0.075 CO2H3CHO | $1.0 \times 10^{-12}$                                                            | <sup>3</sup>                                               |   |
| LHMVKABO2 + CH3C(O)O2 | →                          | 0.3 HCHO + 0.3 MGLY + 0.3 HO2 + 0.7 CH3C(O)O2 + 0.7 OHCCH2OH + CH3O2                                                          | $1.0 \times 10^{-11}$                                                            | <sup>3</sup>                                               |   |
| BIACETOH + OH         | →                          | HO2 + CH3C(O)O2 + 2 CO                                                                                                        | $2.0 \times 10^{-12} \times \exp(70/T)$                                          | <sup>1</sup>                                               | 5 |
| CO2H3CHO + OH         | →                          | HO2 + MGLY                                                                                                                    | $5.0 \times 10^{-12} \times \exp(470/T)$                                         | <sup>1</sup> (for sens. study CO2H3CO3 pathways are added) | 5 |
| CO2H3CHO + NO3        | →                          | HO2 + MGLY + HNO3                                                                                                             | $5.6 \times 10^{-12} \times \exp(-1860/T)$                                       | MCM                                                        | 5 |
| MALO2 + NO            | →                          | 0.4 GLY + HO2 + 0.4 CO + 0.6 MALANHY + NO2                                                                                    | $7.5 \times 10^{-12} \times \exp(290/T)$                                         | MCM                                                        | X |
| MALO2 + HO2           | →                          | 0.2 GLY + 0.3 MALANHY + 0.5 HO2 + 0.2 CO + 0.5 OH + 0.13 O3 + 0.13 BIGACID1 + 0.37 MALOOH                                     | $2.62 \times 10^{-12} \times \exp(730/T)$                                        | <sup>6</sup>                                               | 2 |
| MALOOH + OH           | →                          | MALO2                                                                                                                         | $4.0 \times 10^{-11}$                                                            | MCM                                                        | X |
| MALO2 + NO2           | $\overset{M}{\rightarrow}$ | MALPAN                                                                                                                        | $k_{tro}(3.28 \times 10^{-28}, -6.87, 0, 1.125 \times 10^{-11}, -1.105, 0, 0.3)$ | MCM                                                        | 1 |
| MALPAN + OH           | →                          | GLY + 2 CO + NO2                                                                                                              | $3.7 \times 10^{-11}$                                                            | MCM                                                        | X |
| MALPAN                | $\overset{M}{\rightarrow}$ | NO2 + MALO2                                                                                                                   | $k_{tro}(1.1 \times 10^{-5}, 0, -10100, 1.9 \times 10^{17}, 0, -14100, 0.3)$     | MCM                                                        | X |
| MALO2 + NO3           | →                          | 0.4 GLY + HO2 + 0.4 CO + 0.6 MALANHY + NO2                                                                                    | $4.0 \times 10^{-12}$                                                            | MCM                                                        | X |
| MALO2 + CH3O2         | →                          | 0.36 GLY + 0.9 HO2 + 0.9 HO2 + 0.36 CO + 0.54 MALANHY + HCHO + 0.1 BIGACID1                                                   | $2.0 \times 10^{-12} \times \exp(500/T)$                                         | Analog to CH3C(O)O2                                        | 2 |
| MALO2 + CH3C(O)O2     | →                          | 0.4 GLY + HO2 + 0.4 CO + 0.6 MALANHY + CH3O2                                                                                  | $2.9 \times 10^{-12} \times \exp(500/T)$                                         | Analog to CH3C(O)O2                                        | 2 |



|                       |                            |                                                                     |                                                                                  |                       |   |
|-----------------------|----------------------------|---------------------------------------------------------------------|----------------------------------------------------------------------------------|-----------------------|---|
| MALANHY + OH          | →                          | MALANHYO2                                                           | $1.4 \times 10^{-12}$                                                            | MCM                   | X |
| MALANHYO2 + HO2       | →                          | MALANHYOOH                                                          | $1.8125 \times 10^{-13} \times \exp(1300/T)$                                     | MCM                   | X |
| MALANHYO2 + NO        | →                          | NO2 + HCOCOHCO3                                                     | $2.7 \times 10^{-12} \times \exp(360/T)$                                         | MCM                   | X |
| MALANHYO2 + NO3       | →                          | NO2 + HCOCOHCO3                                                     | $2.3 \times 10^{-12}$                                                            | MCM                   | X |
| MALANHYO2 + CH3O2     | →                          | 0.3 HCOCOHCO3 + 0.3 HO2 + 0.5 HCHO + 0.5 CH3OH + 0.8 MALANHYCO      | $3.8 \times 10^{-12}$                                                            | Analog to CC(=O)C=[O] | X |
| MALANHYO2 + CH3C(O)O2 | →                          | 0.5 HCOCOHCO3 + 0.5 CH3O2 + 0.5 CH3COOH + 0.5 MALANHYCO             | $5.0 \times 10^{-12}$                                                            | Analog to CC(=O)CO[O] | X |
| MALANHYCO + OH        | →                          | 3 CO + HO2                                                          | $5.68 \times 10^{-12}$                                                           | MCM                   | X |
| MALANHYOOH + OH       | →                          | MALANHYCO + OH                                                      | $4.66 \times 10^{-11}$                                                           | MCM                   | X |
| IBUTALOH + OH         | →                          | IBUTALOH2                                                           | $1.4 \times 10^{-11}$                                                            | <sup>3</sup>          |   |
| IBUTALOH2 + NO        | →                          | HO2 + CH3COCH3 + NO2                                                | $7.5 \times 10^{-12} \times \exp(290/T)$                                         | MCM                   | X |
| IBUTALOH2 + NO3       | →                          | HO2 + CH3COCH3 + NO2                                                | $4.0 \times 10^{-12}$                                                            | MCM                   | X |
| IBUTALOH2 + HO2       | →                          | 0.37 IBUTALOHOOH + 0.5 CH3COCH3 + 0.5 OH + 0.13 IBUTALOOH + 0.13 O3 | $2.62 \times 10^{-12} \times \exp(730/T)$                                        | <sup>6</sup>          | X |
| IBUTALOOH + OH        | →                          | CH3COCH3 + HO2                                                      | $4.66 \times 10^{-13} \times \exp(326/T)$                                        | <sup>12</sup> , MCM   | X |
| IBUTALOHOOH + OH      | →                          | IBUTALOH2                                                           | $7.513 \times 10^{-13} \times \exp(494/T)$                                       | <sup>12</sup> , MCM   | X |
| IBUTALOH2 + CH3O2     | →                          | HCHO + 1.8 HO2 + 0.9 CH3COCH3 + 0.1 IBUTALOOH                       | $2.0 \times 10^{-12} \times \exp(500/T)$                                         | Analog to CH3C(O)O2   | X |
| IBUTALOH2 + CH3C(O)O2 | →                          | HO2 + CH3COCH3 + CH3O2                                              | $2.9 \times 10^{-12} \times \exp(500/T)$                                         | Analog to CH3C(O)O2   | X |
| IBUTALOH2 + NO2       | $\overset{M}{\rightarrow}$ | C4PAN5                                                              | $k_{tro}(3.28 \times 10^{-28}, -6.87, 0, 1.125 \times 10^{-11}, -1.105, 0, 0.3)$ | MCM                   | 1 |
| C4PAN5 + OH           | →                          | CH3COCH3 + CO + NO2                                                 | $4.75 \times 10^{-13}$                                                           | MCM                   | X |
| C4PAN5                | $\overset{M}{\rightarrow}$ | IBUTALOH2 + NO2                                                     | $k_{tro}(1.1 \times 10^{-5}, 0, -10100, 1.9 \times 10^{17}, 0, -14100, 0.3)$     | MCM                   | X |
| HVMK + OH             | →                          | 0.25 CO2H3CHO + 0.25 HO2 + 0.75 OH + 0.75 MGLY + 0.75 HCOOH         | $3.35 \times 10^{-12} \times \exp(983/T)$                                        | <sup>1</sup>          | X |
| MACRENOL + OH         | →                          | CO + 0.87 CH3COCOOH + 0.87 HO2 + 0.13 OH + 0.13 CH3C(O)O2           | $3.83 \times 10^{-12} \times \exp(983/T)$                                        | <sup>1</sup>          | X |
| C3MDIALOH + OH        | →                          | OH + CO + HO2 + CH3C(O)O2                                           | $5.0 \times 10^{-12} \times \exp(470/T)$                                         | <sup>1</sup>          | X |

|                       |   |                                                                                        |                                              |                     |   |
|-----------------------|---|----------------------------------------------------------------------------------------|----------------------------------------------|---------------------|---|
| BIGALD1 + OH          | → | 0.83 MALO2 + 0.34 GLY + 0.17 HO2                                                       | $5.2 \times 10^{-11}$                        | MCM                 | X |
| BIGALD1 + NO3         | → | MALO2 + HNO3                                                                           | $5.6 \times 10^{-12} \times \exp(-1862/T)$   | MCM                 | X |
| BIGALD1 + O3          | → | 1.0675 GLY + 0.125 HCHO + 0.57 OH + 0.82 HO2 + 1.265 CO + 0.1125 HOOCCHO + 0.0675 H2O2 | $2.0 \times 10^{-18}$                        | MCM                 | X |
| HOCOC4DIAL + OH       | → | HO2 + CO2C4DIAL                                                                        | $3.67 \times 10^{-11}$                       | MCM                 | X |
| CO2C4DIAL + OH        | → | HO2 + 4 CO                                                                             | $3.55 \times 10^{-12} \times \exp(591/T)$    | <sup>12</sup> , MCM | X |
| BIGACID1 + OH         | → | 0.4 GLY + HO2 + 0.4 CO + 0.6 MALANHY                                                   | $3.7 \times 10^{-11}$                        | MCM                 | X |
| BZFUONE + NO3         | → | HNO3 + BZFUONEO2                                                                       | $3.0 \times 10^{-13}$                        | MCM                 | X |
| BZFUONE + OH          | → | BZFUONEO2                                                                              | $4.45 \times 10^{-11}$                       | MCM                 | X |
| BZFUONEO2 + HO2       | → | BZFUONEOOH                                                                             | $2.05 \times 10^{-13} \times \exp(1300/T)$   | MCM                 | X |
| BZFUONEO2 + NO        | → | NO2 + BZFUO + HO2                                                                      | $2.7 \times 10^{-12} \times \exp(360/T)$     | MCM                 | X |
| BZFUONEO2 + NO3       | → | NO2 + BZFUO + HO2                                                                      | $2.3 \times 10^{-12}$                        | MCM                 | X |
| BZFUONEO2 + CH3O2     | → | BZFUO + 2 HO2 + HCHO                                                                   | $1.0 \times 10^{-12}$                        | MCM, RO2 chemistry  | X |
| BZFUONEO2 + CH3C(O)O2 | → | BZFUO + HO2 + CH3O2                                                                    | $1.0 \times 10^{-11}$                        | MCM, RO2 chemistry  | X |
| BZFUONEOOH + OH       | → | BZFUONEO2                                                                              | $3.68 \times 10^{-11}$                       | MCM                 | X |
| BZFUO + NO3           | → | HNO3 + 2 CO + HO2 + HCHO                                                               | $11.52 \times 10^{-12} \times \exp(-1862/T)$ | MCM                 | X |
| BZFUO + OH            | → | 2 CO + HO2 + HCHO                                                                      | $3.44 \times 10^{-11}$                       | MCM                 | X |

|               |   |                                                                                                                                    |                                          |                                            |   |
|---------------|---|------------------------------------------------------------------------------------------------------------------------------------|------------------------------------------|--------------------------------------------|---|
| C5 chemistry  |   |                                                                                                                                    |                                          |                                            |   |
| MDIALO2 + NO  | → | 0.825 HO2 + 0.175 MGLY + 0.35 CO + 0.175 CH3O2 + 0.175 GLY + NO2 + 0.65 MALANHY                                                    | $7.5 \times 10^{-12} \times \exp(290/T)$ | MCM (ratio 50:50 for C3MCOBCO3: MC3COBCO3) | X |
| MDIALO2 + NO3 | → | 0.825 HO2 + 0.175 MGLY + 0.35 CO + 0.175 CH3O2 + 0.175 GLY + NO2 + 0.65 MALANHY                                                    | $4.0 \times 10^{-12}$                    | MCM                                        | X |
| MDIALO2 + HO2 | → | 0.5 OH + 0.4125 HO2 + 0.37 MDIALOOH + 0.0875 MGLY + 0.175 CO + 0.0875 CH3O2 + 0.0875 GLY + 0.325 MALANHY + 0.13 BIGACID2 + 0.13 O3 | $2.8 \times 10^{-12} \times \exp(730/T)$ | <sup>6</sup>                               | 2 |
| MDIALOOH + O3 | → | 0.365 O=C(OO)C=O + 0.17515 MGLY + 0.37056875 GLY + 0.82485 CH3C(O)O2 + 1.08 OH + 0.12015 HO2 + 0.56515 CO +                        | $2.4 \times 10^{-17}$                    | MCM                                        | X |

|                     |                            |                                                                                                       |                                                                                |                     |   |   |
|---------------------|----------------------------|-------------------------------------------------------------------------------------------------------|--------------------------------------------------------------------------------|---------------------|---|---|
|                     |                            | 0.000556875 H2O2 + 0.135 O=CC(=O)O[O] + 0.00928125 HOOCCHO                                            |                                                                                |                     |   |   |
| MDIALOOH + OH       | →                          | 0.5 GLY + 0.5 MGLY + HO2 + 0.5 O=C(OO)C=O + 0.5 OH + 0.5 CH3C(O)O2                                    | 4.72×10 <sup>-11</sup>                                                         | MCM                 |   | X |
| MDIALO2 + CH3O2     | →                          | 1.6425 HO2 + 0.1575 MGLY + 0.315 CO + 0.1575 CH3O2 + 0.1575 GLY + HCHO + 0.585 MALANHY + 0.1 BIGACID2 | 2.0×10 <sup>-12</sup> ×exp (500/T)                                             | Analog to CH3C(O)O2 |   | 2 |
| MDIALO2 + CH3C(O)O2 | →                          | 0.825 HO2 + 0.175 MGLY + 0.35 CO + 0.175 GLY + 1.175 CH3O2 + 0.65 MALANHY                             | 2.9×10 <sup>-12</sup> ×exp (500/T)                                             | Analog to CH3C(O)O2 |   | 2 |
| MDIALO2 + NO2       | $\overset{M}{\rightarrow}$ | MDIALPAN                                                                                              | $k_{tro}(3.28\times 10^{-28}, -6.87, 0, 1.125\times 10^{-11}, -1.105, 0, 0.3)$ | MCM                 |   | 1 |
| MDIALPAN + OH       |                            | 0.5 GLY + 0.5 HCHO + 1.5 CO + NO2 + 0.5 MGLY                                                          | 4.37×10 <sup>-11</sup>                                                         | MCM                 |   | X |
| MDIALPAN            | $\overset{M}{\rightarrow}$ | NO2 + MDIALO2                                                                                         | $k_{tro}(1.1\times 10^{-5}, 0, -10100, 1.9\times 10^{17}, 0, -14100, 0.3)$     | MCM                 |   | X |
| BIGALK + OH         | →                          | ALKO2                                                                                                 | 3.5×10 <sup>-12</sup>                                                          |                     | 3 |   |
| ALKO2 + NO          | →                          | 0.36 CH3CHO + 0.225 HCHO + 0.225 CH3COCH3 + 0.9 HO2 + 0.72 MEK + 0.9 NO2 + 0.1 ALKNO3                 | 4.2×10 <sup>-12</sup> ×exp (180/T)                                             |                     | 3 |   |
| ALKNO3 + OH         | →                          | 0.4 CH3CHO + 0.25 HCHO + 0.25 CH3COCH3 + HO2 + 0.8 MEK + NO2                                          | 2.0×10 <sup>-12</sup>                                                          |                     | 3 |   |
| ALKO2 + HO2         | →                          | ALKOOH                                                                                                | 7.5×10 <sup>-13</sup> ×exp (700/T)                                             |                     | 3 |   |
| ALKOOH + OH         | →                          | ALKO2                                                                                                 | 3.8×10 <sup>-12</sup> ×exp (200/T)                                             |                     | 3 |   |
| ALKO2 + CH3O2       | →                          | 0.3 CH3CHO + 1.1875 HCHO + 0.1875 CH3COCH3 + 0.75 HO2 + 0.6 MEK + 0.25ALKOH                           | 1.0×10 <sup>-12</sup>                                                          |                     | 3 |   |
| ALKOH + OH          | →                          | 1.25 MEK + HO2                                                                                        | 5.0×10 <sup>-12</sup>                                                          |                     | 3 |   |
| ALKO2 + CH3C(O)O2   | →                          | 0.4 CH3CHO + 0.25 HCHO + 0.25 CH3COCH3 + HO2 + 0.8 MEK + CH3O2                                        | 1.0×10 <sup>-11</sup>                                                          |                     | 3 |   |
| MBO + OH            | →                          | MBOO2                                                                                                 | 8.1×10 <sup>-12</sup> ×exp (610/T)                                             |                     | 3 |   |
| MBO + O3            | →                          | 0.35 CO + 0.5 HCHO + 0.1 CH3COCH3 + 0.9 IBUTALOH + 0.25 HCOOH + 0.06 HO2 + 0.06 OH                    | 1.0×10 <sup>-17</sup>                                                          |                     | 3 |   |
| MBO + NO3           | →                          | MBONO3O2                                                                                              | 4.6×10 <sup>-14</sup> ×exp (-400/T)                                            |                     | 3 |   |
| MBOO2 + NO          | →                          | HO2 + 0.67 CH3COCH3 + 0.67 OHCCH2OH + 0.33 HCHO + 0.33 IBUTALOH + NO2                                 | 2.6×10 <sup>-12</sup> ×exp (365/T)                                             |                     | 3 |   |
| MBOO2 + HO2         | →                          | MBOOOH                                                                                                | 7.5×10 <sup>-13</sup> ×exp (700/T)                                             |                     | 3 |   |

|                      |                            |                                                                                                                     |                                                                                  |                          |   |
|----------------------|----------------------------|---------------------------------------------------------------------------------------------------------------------|----------------------------------------------------------------------------------|--------------------------|---|
| MBOOOH + OH          | →                          | 0.5 MBOO2 + 0.625 MACROH + 0.5 OH                                                                                   | $3.8 \times 10^{-12} \times \exp(200/T)$                                         | <sup>3</sup>             |   |
| MBOO2 + CH3O2        | →                          | 0.9165 HCHO + 0.625 MACROH + 0.25 CH3OH + HO2 + 0.3335 CH3COCH3 + 0.3335 OHCCH2OH + 0.1665 IBUTALOH                 | $3.7 \times 10^{-13} \times \exp(-40/T)$                                         | <sup>3</sup>             |   |
| MBOO2 + CH3C(O)O2    | →                          | HO2 + 0.67 CH3COCH3 + 0.67 OHCCH2OH + 0.33 HCHO + 0.33 IBUTALOH + CH3O2                                             | $1.0 \times 10^{-11}$                                                            | <sup>3</sup>             |   |
| MBONO3O2 + NO        | →                          | 0.35 HCHO + 0.35 IBUTALOH + 1.35 NO2 + 0.43 NOA + 0.65 CH3COCH3 + 0.65 HO2                                          | $2.6 \times 10^{-12} \times \exp(365/T)$                                         | <sup>3</sup> , MCM       | X |
| MBONO3O2 + NO3       | →                          | 0.35 HCHO + 0.35 IBUTALOH + 1.35 NO2 + 0.43 NOA + 0.65 CH3COCH3 + 0.65 HO2                                          | $2.3 \times 10^{-12}$                                                            | MCM                      | X |
| MBONO3O2 + HO2       | →                          | MBONO3OOH                                                                                                           | $4.3 \times 10^{-13} \times \exp(1040/T)$                                        | <sup>3</sup> , MCM       | X |
| MBONO3O2 + CH3O2     | →                          | 0.875 HCHO + 0.125 IBUTALOH + 0.12 5NO2 + 0.25 NOA + 0.375 CH3COCH3 + 0.875 HO2 + 0.25 CH3OH + 0.625 MACROH         | $1.0 \times 10^{-12}$                                                            | <sup>3</sup>             |   |
| MBONO3O2 + CH3C(O)O2 | →                          | 0.35 HCHO + 0.35 IBUTALOH + 0.35 NO2 + 0.43 NOA + 0.65 CH3COCH3 + 0.65 HO2 + CH3O2                                  | $1.0 \times 10^{-11}$                                                            | Analog to NO3            | X |
| MBONO3OOH + OH       | →                          | MBONO3O2                                                                                                            | $1.9 \times 10^{-12} \times \exp(910/T)$                                         | <sup>3</sup>             |   |
| DICARBO2 + NO        | →                          | 0.17 MGLY + 0.17 HO2 + 0.17 CO + 0.83 MALANHY + 0.83 CH3O2 + NO2                                                    | $7.5 \times 10^{-12} \times \exp(290/T)$                                         | MCM                      | X |
| DICARBO2 + NO3       | →                          | 0.17 MGLY + 0.17 HO2 + 0.17 CO + 0.83 MALANHY + 0.83 CH3O2 + NO2                                                    | $4.0 \times 10^{-12}$                                                            | MCM                      | X |
| DICARBO2 + NO2       | $\overset{M}{\rightarrow}$ | DICARBPAN                                                                                                           | $k_{tro}(3.28 \times 10^{-28}, -6.87, 0, 1.125 \times 10^{-11}, -1.105, 0, 0.3)$ | MCM                      | 1 |
| DICARBO2 + HO2       | →                          | 0.085 MGLY + 0.085 HO2 + 0.085 CO + 0.415 MALANHY + 0.415 CH3O2 + 0.5 OH + 0.37 DICARBOOH + 0.13 BIGACID2 + 0.13 O3 | $2.8 \times 10^{-12} \times \exp(730/T)$                                         | MCM, <sup>6</sup>        | 2 |
| DICARBPAN            | $\overset{M}{\rightarrow}$ | DICARBO2 + NO2                                                                                                      | $k_{tro}(1.1 \times 10^{-5}, 0, -10100, 1.9 \times 10^{17}, 0, -14100, 0.3)$     | MCM                      | X |
| DICARBPAN + OH       | →                          | MGLY + 2 CO + NO2                                                                                                   | $5.43 \times 10^{-11}$                                                           | MCM                      | X |
| DICARBO2 + CH3O2     | →                          | 0.153 MGLY + 1.053 HO2 + 0.153 CO + 0.747 CH3O2 + 0.747 MALANHY + HCHO + 0.1 BIGACID2                               | $2.0 \times 10^{-12} \times \exp(500/T)$                                         | MCM, CH3C(O)O2 chemistry | 2 |
| DICARBO2 + CH3C(O)O2 | →                          | 0.17 MGLY + 0.17 HO2 + 0.17 CO + 0.83 CH3O2 + 0.83 MALANHY + CH3O2                                                  | $2.9 \times 10^{-12} \times \exp(500/T)$                                         | MCM, CH3C(O)O2 chemistry | 2 |
| DICARBOOH + OH       | →                          | DICARBO2                                                                                                            | $3.59 \times 10^{-12}$                                                           | MCM                      | X |

|                      |                                                                                                                                                                    |                                             |                    |   |
|----------------------|--------------------------------------------------------------------------------------------------------------------------------------------------------------------|---------------------------------------------|--------------------|---|
| BIGACID2 + OH        | → 0.17 MGLY + 0.17 HO2 + 0.17 CO + 0.83 CH3O2 + 0.83 MALANHY                                                                                                       | $5.44 \times 10^{-11}$                      | MCM                | X |
| BIGALD2 + OH         | → 0.48 DICARBO2 + 0.52 MGLY + 0.52 GLY + 0.52 HO2                                                                                                                  | $6.2 \times 10^{-11}$                       | MCM                | X |
| BIGALD2 + NO3        | → DICARBO2 + HNO3                                                                                                                                                  | $3.85 \times 10^{-12} \times \exp(-1862/T)$ | MCM                | X |
| BIGALD2 + O3         | → 0.5675 GLY + 0.3475 CH3C(O)O2 + 0.0625 CH3CHO + 0.9175 CO + 0.57 OH + 0.4725 HO2 + 0.0675 H2O2 + 0.05625 CH3COCO2H + 0.5675 MGLY + 0.0625 HCHO + 0.05625 HOOCCHO | $2.0 \times 10^{-18}$                       | MCM                | X |
| BIGALD3 + OH         | → 0.77 MDIALO2 + 0.23 GLY + 0.23 MGLY + 0.23 HO2                                                                                                                   | $4.41 \times 10^{-11}$                      | MCM                | X |
| BIGALD3 + NO3        | → MDIALO2 + HNO3                                                                                                                                                   | $5.95 \times 10^{-12} \times \exp(-1862/T)$ | MCM                | X |
| BIGALD3 + NO3        | → MDIALO2 + HNO3                                                                                                                                                   | $5.95 \times 10^{-12} \times \exp(-1862/T)$ | MCM                | X |
| BIGALD3 + O3         | → 0.89 OH + 1.335 CO + 0.445 CH3C(O)O2 + 0.555 MGLY + 0.075625 H2O2 + 0.520625 GLY + 0.445 HO2 + 0.034375 HOOCCHO                                                  | $5.0 \times 10^{-18}$                       | MCM                | X |
| FUONE + NO3          | → NO2 + FUONEO2                                                                                                                                                    | $1.0 \times 10^{-12}$                       | MCM                | X |
| FUONE + OH           | → FUONEO2                                                                                                                                                          | $2.42 \times 10^{-11}$                      | MCM (for PXFUONE)  | X |
| FUONEO2 + HO2        | → FUONEOOH                                                                                                                                                         | $2.05 \times 10^{-13} \times \exp(1300/T)$  | MCM                | X |
| FUONEO2 + NO         | → NO2 + HO2 + CH3C(O)O2 + HCHO                                                                                                                                     | $2.7 \times 10^{-12} \times \exp(360/T)$    | MCM                | X |
| FUONEO2 + NO3        | → NO2 + HO2 + CH3C(O)O2 + HCHO                                                                                                                                     | $5.08 \times 10^{-11}$                      | MCM                | X |
| FUONEO2 + CH3O2      | → HO2 + CH3C(O)O2 + HCHO + HO2 + HCHO                                                                                                                              | $1.0 \times 10^{-12}$                       | MCM, RO2 chemistry | X |
| FUONEO2 + CH3C(O)O2  | → HO2 + CH3C(O)O2 + HCHO + CH3O2                                                                                                                                   | $1.0 \times 10^{-11}$                       | MCM, RO2 chemistry | X |
| FUONEOOH + OH        | → FUONEO2                                                                                                                                                          | $2.78 \times 10^{-11}$                      | MCM                | X |
| C5DIALO2 + NO        | → BIGALD1 + CO + HO2 + NO2                                                                                                                                         | $2.7 \times 10^{-12} \times \exp(360/T)$    | MCM                | X |
| C5DIALO2 + NO3       | → BIGALD1 + CO + HO2 + NO2                                                                                                                                         | $2.3 \times 10^{-12}$                       | MCM                | X |
| C5DIALO2 + HO2       | → C5DIALOOH                                                                                                                                                        | $2.05 \times 10^{-13} \times \exp(1300/T)$  | MCM                | X |
| C5DIALOOH + OH       | → OH + MALO2 + CO + HO2                                                                                                                                            | $7.25 \times 10^{-11}$                      | MCM                | X |
| C5DIALO2 + CH3O2     | → 0.6 HO2 + 0.8 HCHO + 0.2 CH3OH + 0.7 BIGALD1 + CO + 1.2 HO2 + 0.3 MALO2                                                                                          | $1.0 \times 10^{-12}$                       | MCM, RO2 chemistry | X |
| C5DIALO2 + CH3C(O)O2 | → 0.8 CH3O2 + 0.2 CH3COOH + 0.8 BIGALD1 + CO + HO2 + 0.2 MALO2                                                                                                     | $1.0 \times 10^{-11}$                       | MCM, RO2 chemistry | X |

| C5 isoprene chemistry |   |                                                                                                                               |                                             |                                                                                                                                      |   |
|-----------------------|---|-------------------------------------------------------------------------------------------------------------------------------|---------------------------------------------|--------------------------------------------------------------------------------------------------------------------------------------|---|
| C5H8 + OH             | → | 0.05 LISOPACO2 + 0.6 ISOPBO2 + 0.35 ISOPDO2                                                                                   | $2.1 \times 10^{-11} \times \exp(465/T)$    | <sup>1, 8</sup> , IUPAC                                                                                                              | 5 |
| C5H8 + O3             | → | 0.407 CH3O2 + 0.407 CO + 0.416 MACR + 0.16 HO2 + 1.059 HCHO + 0.28 OH + 0.177 MVK + 0.245 H2O2 + 0.319 HOCH2OOH + 0.029 HCOOH | $1.05 \times 10^{-14} \times \exp(-2000/T)$ | <sup>1, 7</sup> , IUPAC                                                                                                              | 5 |
| C5H8 + NO3            | → | 0.465 NISOPBO2 + 0.535 NISOPDO2                                                                                               | $2.95 \times 10^{-12} \times \exp(-450/T)$  | <sup>1</sup> (for sens. study NISOPO2 pathways asre added)                                                                           | 5 |
| LISOPACO2 + NO        | → | 0.4 HO2 + 0.88 NO2 + 0.12 LISOPACNO3 + 0.4 LHC4ACCHO + 0.48 CO + 0.48 OH + 0.29 LHMVKABOOH + 0.19 MACROOH                     | $2.7 \times 10^{-12} \times \exp(360/T)$    | <sup>1</sup> (60% ISOP1CO4OH, 40% ISOP1OH4CO)                                                                                        |   |
| LISOPACO2 + NO3       |   | 0.45 HO2 + NO2 + 0.45 LHC4ACCHO + 0.55 CO + 0.55 OH + 0.33 LHMVKABOOH + 0.22 MACROOH                                          | $2.3 \times 10^{-12}$                       | <sup>3</sup> , $k_{RO2NO3}$                                                                                                          | X |
| LISOPACNO3 + OH       | → | 0.94 LISOPACNO3O2 + 0.06 LIEPOX + 0.06 NO2                                                                                    | $2.74 \times 10^{-11} \times \exp(390/T)$   | <sup>1</sup>                                                                                                                         | X |
| LISOPACNO3 + OH       | → | 0.4 NC4CHO + 0.4 HO2 + 0.24 MACRNOOH + 0.6 CO + 0.6 OH + 0.36 LHMVKNOOH                                                       | $7.5 \times 10^{-12} \times \exp(20/T)$     | <sup>1</sup>                                                                                                                         | X |
| LISOPACO2 + HO2       | → | LISOPACOOH                                                                                                                    | $2.12 \times 10^{-13} \times \exp(1300/T)$  | <sup>1</sup>                                                                                                                         | X |
| LISOPACOOH + OH       | → | 0.46 LIEPOX + 0.46 OH + 0.42 IDHPOO1 + 0.12 IDHPOO2                                                                           | $3.0 \times 10^{-11} \times \exp(390/T)$    | <sup>1</sup>                                                                                                                         | X |
| LISOPACOOH + OH       | → | LISOPACO2                                                                                                                     | $2.0 \times 10^{-12} \times \exp(200/T)$    | <sup>1</sup>                                                                                                                         | X |
| LISOPACOOH + OH       | → | 0.8 OH + 0.5 LHC4ACCHO + 0.2 HPALD + 0.18 HO2 + 0.3 CO + 0.18 DHPMEK + 0.12 DHPMPAL                                           | $1.5 \times 10^{-11} \times \exp(20/T)$     | <sup>1</sup>                                                                                                                         | X |
| LISOPACO2 + CH3O2     | → | HCHO + 0.725 LHC4ACCHO + 0.275 CO + 0.275 OH + 0.165 LHMVKABOOH + 0.11 MACROOH + 0.725 HO2                                    | $2.0 \times 10^{-12}$                       | <sup>1</sup>                                                                                                                         | X |
| LISOPACO2 + CH3C(O)O2 | → | HO2 + LHC4ACCHO + CH3O2                                                                                                       | $1.0 \times 10^{-11}$                       | <sup>3</sup>                                                                                                                         |   |
| LISOPACO2 + ISOPBO2   | → | MVK + HCHO + 0.557 LHC4ACCHO + 0.443 CO + 0.443 OH + 0.266 LHMVKABOOH + 0.177 MACROOH + 1.167 HO2                             | $2.49 \times 10^{-12}$                      | <sup>1</sup> ; including subsequent reactions according to MCM3.3.1 and the recommendation for the reduced mechanism see sect. 2.5.2 | X |
| LISOPACO2 + ISOPDO2   | → | 0.705 MACR + 0.705 HCHO + 0.295 HCOC5 + 0.612 LHC4ACCHO + 0.388 CO + 0.388 OH + 0.233 LHMVKABOOH + 0.155 MACROOH + 1.022 HO2  | $3.94 \times 10^{-12}$                      | <sup>1</sup> ; including subsequent reactions according to MCM3.3.1 and the                                                          | X |

|                  |                                                                                                                           |                                                      |                                             |                                                                                                 |   |
|------------------|---------------------------------------------------------------------------------------------------------------------------|------------------------------------------------------|---------------------------------------------|-------------------------------------------------------------------------------------------------|---|
| LISOPACO2        | → 0.4 HO2 + 0.4 HPALD + 0.6 DHPMEK + 0.6 CO + 0.6 OH                                                                      | $k_{iso}(1.63 \times 10^{14}, 12200, 1 \times 10^8)$ | <sup>1</sup>                                | recommendation for the reduced mechanism see sect. 2.5.2                                        | 5 |
| LISOPACO2        | → 0.4 HO2 + 0.4 HPALD + 0.6 DHPMPAL + 0.6 CO + 0.6 OH                                                                     | $k_{iso}(4.34 \times 10^7, 7160, 1 \times 10^8)$     | <sup>1</sup>                                |                                                                                                 | 5 |
| DHPMPAL + OH     | → 0.32 C3MDIALOOH + 0.68 CO + OH + 0.68 CC(=O)COO                                                                         | $2.62 \times 10^{-12} \times \exp(713/T)$            | <sup>12</sup> , MCM                         |                                                                                                 | X |
| DHPMEK + OH      | → CH3C(O)O2 + 2 CO                                                                                                        | $6.6 \times 10^{-13} \times \exp(1057/T)$            | <sup>12</sup> , MCM, only dominant pathways |                                                                                                 | X |
| C3MDIALOOH + OH  | → C3MDIALO2                                                                                                               | $1.402 \times 10^{-10} \times \exp(227/T)$           | <sup>12</sup> , MCM                         |                                                                                                 | X |
| C3MDIALO2 + HO2  | → C3MDIALOOH                                                                                                              | $1.82 \times 10^{-13} \times \exp(1300/T)$           | MCM                                         |                                                                                                 | X |
| C3MDIALO2 + NO   | → NO2 + MGLY + CO + HO2                                                                                                   | $2.7 \times 10^{-12} \times \exp(360/T)$             | MCM                                         |                                                                                                 | X |
| C3MDIALO2 + NO3  | → NO2 + MGLY + CO + HO2                                                                                                   | $2.3 \times 10^{-12}$                                | MCM                                         |                                                                                                 | X |
| ISOPBO2          | → OH + HCHO + MVK                                                                                                         | $1.04 \times 10^{11} \times \exp(-9746/T)$           | <sup>1</sup>                                |                                                                                                 | 5 |
| ISOPDO2          | → OH + HCHO + MACR                                                                                                        | $1.88 \times 10^{11} \times \exp(-9752/T)$           | <sup>1</sup>                                |                                                                                                 | 5 |
| LIEPOX + OH      | → 0.8 LC578O2 + 0.2 LIECHO + 0.2 HO2                                                                                      | $4.4 \times 10^{-11} \times \exp(-400/T)$            | <sup>1, 9</sup>                             |                                                                                                 | X |
| LIECHO + OH      | → 0.28 OH + 1.28 CO + 0.28 CH3COCH2OH + 0.72 LHMVKABO2                                                                    | $1.5 \times 10^{-11}$                                | <sup>9</sup>                                |                                                                                                 | X |
| LIECHO + OH      | → CO + HO2 + 0.28 C3MDIALOOH + 0.72 MDIALOOH                                                                              | $2.2 \times 10^{-11} \times \exp(-400/T)$            | <sup>9</sup>                                |                                                                                                 | X |
| LIECO3H + OH     | → 0.888 CO + 0.444 OH + 0.444 HO2 + 0.318 CO2H3CHO + 0.112 LC578O2 + 0.126 C3MDIALOH + 0.444 LHMVKABOOH                   | $2.25 \times 10^{-11}$                               | <sup>1</sup>                                |                                                                                                 | X |
| ISOPBO2 + NO     | → 0.86 HO2 + 0.86 NO2 + 0.86 HCHO + 0.86 MVK + 0.14 ISOPBNO3                                                              | $2.7 \times 10^{-12} \times \exp(360/T)$             | <sup>1</sup>                                |                                                                                                 | X |
| ISOPBNO3 + OH    | → 0.15 LIEPOX + 0.15 NO2 + 0.85 ISOPBNO3O2                                                                                | $8.4 \times 10^{-12} \times \exp(390/T)$             | <sup>9</sup>                                |                                                                                                 | X |
| ISOPBNO3O2 + NO  | → 0.26 HCHO + 0.26 HO2 + 0.26 MACR2N3OH + 0.69 OHCCH2OH + 0.69 CH3COCH2OH + 1.64 NO2 + 0.05 LISOPNO3NO3                   | $2.7 \times 10^{-12} \times \exp(360/T)$             | <sup>1</sup>                                |                                                                                                 | X |
| ISOPBNO3O2 + NO3 | → 0.272 HCHO + 0.272 HO2 + 0.272 MACR2N3OH + 0.728 OHCCH2OH + 0.728 CH3COCH2OH + 1.728 NO2                                | $2.3 \times 10^{-12}$                                |                                             | Products analog to reaction with NO but no organic nitrate formation, MCM KRO2NO3 rate constant | X |
| ISOPBNO3O2 + HO2 | → 0.482 LISOPNO3OOH + 0.059 MACR2N3OH + 0.059 HCHO + 0.459 OHCCH2OH + 0.459 CH3COCH2OH + 0.059 HO2 + 0.459 NO2 + 0.518 OH | $2.6 \times 10^{-13} \times \exp(1300/T)$            | <sup>1</sup>                                |                                                                                                 | X |

|                     |                                                                                                        |                                                        |                                                                            |   |
|---------------------|--------------------------------------------------------------------------------------------------------|--------------------------------------------------------|----------------------------------------------------------------------------|---|
| ISOPBNO3O2          | → NISOPOOH=O + HO2                                                                                     | $1.875 \times 10^{13} \times \exp(-10000/T)$           | <sup>1</sup>                                                               | X |
| ISOPBO2 + NO3       | → NO2 + MVK + HO2 + HCHO                                                                               | $2.3 \times 10^{-12}$                                  | See ISOPBNO3O2                                                             | X |
| ISOPBO2 + HO2       | → 0.973 ISOPBOOH + 0.063 MVK + 0.063 OH + 0.063 HO2 + 0.063 HCHO                                       | $2.12 \times 10^{-13} \times \exp(1300/T)$             | <sup>1</sup>                                                               | X |
| ISOPBOOH + OH       | → 0.75 ISOPBO2 + 0.125 MVK + 0.25 HO2 + 0.125 MVKOOH + 0.25 CO                                         | $6.1 \times 10^{-12} \times \exp(200/T)$               | <sup>1</sup>                                                               | X |
| ISOPBOOH + OH       | → 0.855 LIEPOX + 0.855 OH + 0.095 IDHPOO3 + 0.05 IDHPOO1                                               | $1.7 \times 10^{-11} \times \exp(390/T)$               | <sup>1</sup>                                                               | X |
| ISOPBO2 + CH3O2     | → 2 HCHO + MVK + 2 HO2                                                                                 | $2.0 \times 10^{-12}$                                  | <sup>1</sup>                                                               | X |
| ISOPBO2 + CH3C(O)O2 | → HO2 + HCHO + MVK + CH3O2                                                                             | $1.0 \times 10^{-11}$                                  | Analog to RO2 chemistry with RO2+CH3C(O)O2 rate constant from <sup>1</sup> | X |
| ISOPBO2 + ISOPBO2   | → 2 MVK + 2 HO2 + 2 HCHO                                                                               | $6.92 \times 10^{-14}$                                 | <sup>1</sup>                                                               | X |
| ISOPDO2 + ISOPDO2   | → 1.6 MACR + 1.6 HO2 + 1.6 HCHO + 0.4 HCOC5                                                            | $5.74 \times 10^{-12}$                                 | <sup>1</sup> , MCM                                                         | X |
| ISOPBO2 + ISOPDO2   | → 0.9 MACR + 1.0 MVK + 1.9 HO2 + 1.9 HCHO + 0.1 HCOC5                                                  | $3.08 \times 10^{-12}$                                 | <sup>1</sup>                                                               | X |
| IDHPOO1 + NO        | → 0.82 NO2 + 0.82 HO2 + 0.15 MACROOH + 0.15 HCHO + 0.18 LISOPNO3OOH + 0.67 CH3COCH2OH + 0.67 HCOCH2OOH | $2.7 \times 10^{-12} \times \exp(360/T)$               | <sup>1</sup>                                                               | X |
| IDHPOO1 + HO2       | → 0.03 MACROOH + 0.4 OH + 0.03 HCHO + 0.4 HO2 + 0.6 LISOPOOHOOH + 0.37 HCOCH2OOH + 0.37 CH3COCH2OH     | $2.47 \times 10^{-13} \times \exp(1300/T)$             | <sup>1</sup>                                                               | X |
| IDHPOO1             | → DHHPEPOX + OH                                                                                        | $k_{iso}(6.8 \times 10^{12}, 11200, 8.46 \times 10^7)$ | <sup>1</sup>                                                               | X |
| IDHPOO3 + NO        | → 0.9 NO2 + 0.9 OH + 0.9 CH3COCH2OH + 0.9 OHCCH2OH + 0.1 LISOPNO3OOH                                   | $2.7 \times 10^{-12} \times \exp(360/T)$               | <sup>1</sup>                                                               | X |
| IDHPOO3 + HO2       | → 1.3 OH + 0.65 CH3COCH2OH + 0.65 OHCCH2OH + 0.35 LISOPOOHOOH                                          | $2.47 \times 10^{-13} \times \exp(1300/T)$             | <sup>1</sup>                                                               | X |
| IDHPOO3             | → DHHPEPOX + OH                                                                                        | $k_{iso}(1.87 \times 10^{12}, 9630, 8.02 \times 10^7)$ | <sup>1</sup>                                                               | X |
| DHHPEPOX + OH       | → OH + 0.571 MACROOH + 0.429 LHMVKABOOH                                                                | $3.0 \times 10^{-12}$                                  | <sup>1</sup>                                                               | X |
| ISOPDO2 + NO        | → 0.87 HO2 + 0.87 NO2 + 0.87 HCHO + 0.87 MACR + 0.13 ISOPDNO3                                          | $2.7 \times 10^{-12} \times \exp(360/T)$               | <sup>1</sup>                                                               | X |
| ISOPDNO3 + OH       | → 0.874 ISOPDNO3O2 + 0.126 LIEPOX + 0.126 NO2                                                          | $1.17 \times 10^{-11} \times \exp(390/T)$              | <sup>1</sup>                                                               | X |



|                     |                                                                                                                 |                                                         |                 |   |
|---------------------|-----------------------------------------------------------------------------------------------------------------|---------------------------------------------------------|-----------------|---|
| ISOPDNO3O2 + NO     | → 0.96 HCHO + 0.96 HO2 + 0.96 MVKN + 0.96 NO2 + 0.04 LISOPNO3NO3                                                | $2.7 \times 10^{-12} \times \exp(360/T)$                | <sup>1</sup>    | X |
| ISOPDNO3O2 + NO3    | → HCHO + HO2 + MVKN + NO2                                                                                       | $2.3 \times 10^{-12}$                                   | See ISOPBNO3O2  | X |
| ISOPDNO3O2 + HO2    | → 0.401 LISOPNO3OOH + 0.599 MVKN + 0.599 HCHO + 0.599 HO2 + 0.599 OH                                            | $2.6 \times 10^{-13} \times \exp(1300/T)$               | <sup>1</sup>    | X |
| ISOPDNO3O2          | → NISOPOOHOH=O + HO2                                                                                            | $1.875 \times 10^{-13} \times \exp(-10000/T)$           | <sup>1</sup>    | X |
| ISOPDO2 + NO3       | → HCHO + MACR + HO2 + NO2                                                                                       | $2.3 \times 10^{-12}$                                   | See ISOPBNO3O2  | X |
| ISOPDO2 + HO2       | → 0.937 ISOPDOOH + 0.063 MACR + 0.063 OH + 0.063 HO2 + 0.063 HCHO                                               | $2.12 \times 10^{-13} \times \exp(1300/T)$              | <sup>1</sup>    | X |
| ISOPDOOH + OH       | → 0.855 LIEPOX + 0.855 OH + 0.095 IDHPOO3 + 0.05 IDHPOO2                                                        | $3.0 \times 10^{-11} \times \exp(390/T)$                | <sup>1</sup>    | X |
| ISOPDOOH + OH       | → 0.51 ISOPDO2 + 0.16 HCOC5 + 0.33 CO + 0.33 HO2 + 0.165 MACR + 0.165 MACROOH                                   | $4.1 \times 10^{-12} \times \exp(200/T)$                | <sup>1</sup>    | X |
| IDHPOO2 + NO        | → 0.87 NO2 + 0.87 HO2 + 0.13 OHCCH2OH + 0.13 CC(=O)COO + 0.13 LISOPNO3OOH + 0.74 LHMVKABOOH + 0.74 HCHO         | $2.7 \times 10^{-12} \times \exp(360/T)$                | <sup>1</sup>    | X |
| IDHPOO2 + HO2       | → 0.24 OH + 0.07 CC(=O)COO + 0.07 OHCCH2OH + 0.24 HO2 + 0.76 LISOPOOHOH + 0.17 HCHO + 0.17 LHMVKABOOH           | $2.47 \times 10^{-13} \times \exp(1300/T)$              | <sup>1</sup>    | X |
| IDHPOO2             | → 0.32 LC578OOH + 0.68 DHHPEPOX + OH                                                                            | $k_{iso}(3.73 \times 10^{12}, 10400, 9.95 \times 10^7)$ | <sup>1</sup>    | X |
| ISOPDO2 + CH3O2     | → 1.25 HCHO + 0.5 MACR + HO2 + 0.5 HCOC5 + 0.25 CH3OH                                                           | $2.0 \times 10^{-12}$                                   | <sup>1</sup>    | X |
| ISOPDO2 + CH3C(O)O2 | → HO2 + HCHO + MACR + CH3O2                                                                                     | $1.0 \times 10^{-11}$                                   | See ISOPBO2     | X |
| NISOPBO2 + NO       | → 0.97 NO2 + 0.65 NISOPEOO1E + 0.32 NISOPEOO1Z + 0.03 NISOPN                                                    | $2.7 \times 10^{-12} \times \exp(360/T)$                | <sup>2</sup>    | X |
| NISOPDO2 + NO       | → 0.1272 HO2 + 0.8 NO2 + 0.1272 NC4CHO + 0.6728 NISOPO + 0.2 NISOPN                                             | $2.7 \times 10^{-12} \times \exp(360/T)$                | <sup>1</sup>    | X |
| NISOPBO2 + NO3      | → NO2 + 0.68 NISOPEOO1E + 0.32 NISOPEOO1Z                                                                       | $2.3 \times 10^{-12}$                                   | <sup>2</sup>    | X |
| NISOPDO2 + NO3      | → 0.159 HO2 + 0.159 NC4CHO + NO2 + 0.841 NISOPO                                                                 | $2.3 \times 10^{-12}$                                   | <sup>1</sup>    | X |
| NISOPBO2 + HO2      | → 0.473 NISOPBOOH + 0.353 NISOPEOO1E + 0.174 NISOPEOO1Z + 0.527 OH                                              | $2.47 \times 10^{-13} \times \exp(1300/T)$              | <sup>1, 2</sup> | X |
| NISOPDO2 + HO2      | → NISOPDOOH                                                                                                     | $2.47 \times 10^{-13} \times \exp(1300/T)$              | <sup>1</sup>    | X |
| NISOPBO2 + CH3O2    | → 0.355 NISOPOH + 0.966 HCHO + 0.034 NC4CHO + 0.19552 NISOPEOO1Z + 0.41548 NISOPEOO1E + 0.611 HO2 + 0.034 CH3OH | $2.8 \times 10^{-13}$                                   | <sup>1, 2</sup> | X |

|                        |                                                                                                                      |                                            |                                                          |   |
|------------------------|----------------------------------------------------------------------------------------------------------------------|--------------------------------------------|----------------------------------------------------------|---|
| NISOPDO2 + CH3O2       | → 0.645 HCHO + 0.401 NC4CHO + 0.355 LISOPACNO3 + 0.244 NISOPBO + 0.336 HO2 + 0.355 CH3OH                             | $1.18 \times 10^{-12}$                     | <sup>1</sup>                                             | X |
| NISOPBO2 + CH3C(O)O2   | → CH3O2 + 0.68 NISOPEOO1E + 0.32 NISOPEOO1Z                                                                          | $1.92 \times 10^{-12}$                     | <sup>1, 2</sup>                                          | X |
| NISOPDO2 + CH3C(O)O2   | → 0.159 HO2 + 0.159 NC4CHO + CH3O2 + 0.84 NISOPBO                                                                    | $7.71 \times 10^{-12}$                     | <sup>1</sup>                                             | X |
| NISOPEOO1E             | → 2 CO + 0.35 NOA + 0.65 MGLY + 1.65 HO2 + 0.65 NO2 + OH                                                             | $4.1 \times 10^{-6}$                       | <sup>2</sup> , ISOP1N23O4CO5OOH treated as ICNE + HO2    | X |
| NISOPEOO1E + HO2       | → IHNEOOH                                                                                                            | $2.52 \times 10^{-13} \times \exp(1300/T)$ | <sup>2</sup>                                             | X |
| NISOPEOO1E + CH3O2     | → 0.76 HCHO + 0.686 HO2 + 0.4 CH3OH + 0.88 CO + 0.154 NOA + 0.286 MGLY + 0.286 NO2 + 0.4 IHNE + 0.16 MACRN           | $1.0 \times 10^{-13} \times \exp(1139/T)$  | <sup>2</sup> , see sect. 2.5.1                           | X |
| NISOPEOO1E + NO3       | → 1.13 HO2 + 0.4 CO + 0.07 NOA + 0.13 MGLY + 1.13 NO2 + 0.8 HCHO + 0.8 MACRN                                         | $1.9 \times 10^{-11} \times \exp(-390/T)$  | <sup>2</sup> , see sect. 2.5.1                           | X |
| NISOPEOO1E + NO        | → 1.13 HO2 + 0.4 CO + 0.07 NOA + 0.13 MGLY + 1.13 NO2 + 0.8 HCHO + 0.8 MACRN                                         | $2.7 \times 10^{-12} \times \exp(360/T)$   | <sup>2</sup> , only main path, see sect. 2.5.1           | X |
| NISOPEOO1E + CH3C(O)O2 | → 1.13 HO2 + 0.4 CO + 0.07 NOA + 0.13 MGLY + 0.13 NO2 + 0.8 HCHO + 0.8 MACRN + CH3O2                                 | $1.0 \times 10^{-11}$                      | Analog to RO2+CH3C(O)O2 chemistry                        | X |
| NISOPEOO1Z             | → LIECHO + NO2                                                                                                       | $3.6 \times 10^{-5}$                       | <sup>2</sup>                                             | X |
| NISOPEOO1Z + HO2       | → IHNEOOH                                                                                                            | $2.52 \times 10^{-13} \times \exp(1300/T)$ | <sup>2</sup>                                             | X |
| NISOPEOO1Z + CH3O2     | → 0.6 HCHO + 0.46 HO2 + 0.2 LIECHO + 0.4 CH3OH + 0.8 CO + 0.14 NOA + 0.26 MGLY + 0.46 NO2 + 0.4 IHNE                 | $1.0 \times 10^{-13} \times \exp(1139/T)$  | <sup>2</sup> , ISOP1N23O4CO-> ICNE in Wennberg           | X |
| NISOPEOO1Z + NO3       | → LIECHO + 2NO2                                                                                                      | $1.9 \times 10^{-11} \times \exp(-390/T)$  | <sup>2</sup>                                             | X |
| NISOPEOO1Z + NO        | → LIECHO + 2NO2                                                                                                      | $2.7 \times 10^{-12} \times \exp(360/T)$   | Analog to reaction with NO <sub>3</sub> , only main path | X |
| NISOPEOO1Z + CH3C(O)O2 | → LIECHO + NO2 + CH3O2                                                                                               | $1.0 \times 10^{-11}$                      | Analog to RO2+CH3C(O)O2 chemistry                        | X |
| NISOPBO2 + NISOPDO2    | → 0.3808 NISOPEOO1E + 0.1792 NISOPEOO1Z + 0.089 HO2 + 0.038 LISOPACNO3 + 0.399 NISOPOH + 0.532 NC4CHO + 0.474 NISOPO | $2.56 \times 10^{-12}$                     | <sup>1, 2</sup>                                          | X |
| NISOPDO2 + NISOPDO2    | → 0.046 HO2 + 0.798 LISOPACNO3 + 0.861 NC4CHO + 0.34 NISOPO                                                          | $3.71 \times 10^{-12}$                     | <sup>1</sup>                                             | X |

|                     |                     |                                                                                                                                                                                                                                        |                                             |                 |   |
|---------------------|---------------------|----------------------------------------------------------------------------------------------------------------------------------------------------------------------------------------------------------------------------------------|---------------------------------------------|-----------------|---|
| NISOPBO2 + NISOPBO2 | →                   | 1.3124 NISOPEOO1E + 0.6176 NISOPEOO1Z + 0.07 NISOPOH + 0.07 NC4CHO                                                                                                                                                                     | $1.61 \times 10^{-12}$                      | <sup>1, 2</sup> | X |
| NISOPBOOH + OH      | →                   | NISOPBO2                                                                                                                                                                                                                               | $3.4 \times 10^{-12} \times \exp(200/T)$    | <sup>1</sup>    | X |
| NISOPBOOH + OH      | →                   | 0.49 OH + 0.49 IHNE + 0.51 NISOPBOO                                                                                                                                                                                                    | $8.72 \times 10^{-12} \times \exp(390/T)$   | <sup>1</sup>    | X |
| NISOPBOO + NO       | →                   | NO2 + 0.233 HCHO + 0.408 OH + 0.055 LHMVKABOOH + 0.644 NOA + 0.36 OHCCH2OH + 0.063 NISOPNOOH + 0.47 HO2 + 0.159 MACRNOOH + 0.013 LHMVKNOOH + 0.048 CH3COCH2OH + 0.06 ETHLN + 0.012 CC(=O)COO + 0.006 MACROOH + 0.284 HCOCH2OOH         | $2.7 \times 10^{-12} \times \exp(360/T)$    | <sup>1</sup>    | X |
| NISOPBOO + HO2      | →                   | 0.234 NISOPOOHOH + 0.326 HO2 + 0.126 HCHO + 1.147 OH + 0.06 MACRNOOH + 0.589 NOA + 0.34 OHCCH2OH + 0.008 LHMVKNOOH + 0.042 CH3COCH2OH + 0.051 ETHLN + 0.058 NO2 + 0.004 MACROOH + 0.009 CC(=O)COO + 0.054 LHMVKABOOH + 0.249 HCOCH2OOH | $2.64 \times 10^{-13} \times \exp(1300/T)$  | <sup>1</sup>    | X |
| NISOPBOO            | →                   | OH + 0.5 NISOPOOHOH=O + 0.5 IHNEOOH                                                                                                                                                                                                    | $8.72 \times 10^{12} \times \exp(-10000/T)$ | <sup>1</sup>    | X |
| NISOPDOOH + OH      | →                   | NISOPDO2                                                                                                                                                                                                                               | $3.4 \times 10^{-12} \times \exp(200/T)$    | <sup>1</sup>    | X |
| NISOPDOOH + OH      | →                   | 0.24 OH + 0.08 NO2 + 0.68 NISOPDOO + 0.24 IHNE + 0.08 LIECHO                                                                                                                                                                           | $2.37 \times 10^{-11} \times \exp(390/T)$   | <sup>1</sup>    | X |
| NISOPDOOH + OH      | →                   | OH + NC4CHO                                                                                                                                                                                                                            | $7.5 \times 10^{-12} \times \exp(20/T)$     | <sup>1</sup>    | X |
| NISOPDOO + NO       | →                   | 0.083 NISOPNOOH + 0.088 OH + 0.312 HCHO + 0.917 NO2 + 0.064 MACRN + 0.541 NOA + 0.541 HCOCH2OOH + 0.829 HO2 + 0.024 MVKN + 0.064 CC(=O)COO + 0.064 ETHLN + 0.021 LHMVKNOOH + 0.203 MACRNOOH                                            | $2.7 \times 10^{-12} \times \exp(360/T)$    | <sup>1</sup>    | X |
| NISOPDOO + HO2      | →                   | 0.387 NISOPOOHOH + 0.088 HCHO + 0.646 OH + 0.023 MACRN + 0.471 NOA + 0.471 HCOCH2OOH + 0.58 HO2 + 0.006 MVKN + 0.005 LHMVKNOOH + 0.05 MACRNOOH + 0.054 CC(=O)COO + 0.054 ETHLN                                                         | $2.64 \times 10^{-13} \times \exp(1300/T)$  | <sup>1</sup>    | X |
| NISOPDOO            | →                   | OH + NISOPOOHOH=O                                                                                                                                                                                                                      | $6.55 \times 10^{12} \times \exp(-10000/T)$ | <sup>1</sup>    | X |
| NISOPOOHOH=O + OH   | →                   | CO + NO2 + 0.75 MVKOOH + 0.25 MACROOH                                                                                                                                                                                                  | $1.0 \times 10^{-11}$                       | <sup>1</sup>    | X |
| NISOPOOHOH + OH     | →                   | OH + NISOPOOHOH=O                                                                                                                                                                                                                      | $2.0 \times 10^{-12}$                       | <sup>1</sup>    | X |
| NISOPO              | $\xrightarrow{O_2}$ | NC4CHO + HO2                                                                                                                                                                                                                           | $2.5 \times 10^{-14} \times \exp(-300/T)$   | <sup>1</sup>    | X |
| NISOPO              | →                   | IDHNBOO                                                                                                                                                                                                                                | $1.0 \times 10^{20} \times \exp(-10000/T)$  | <sup>1</sup>    | X |

|                |                                                                                                                                                            |                                            |                                                                          |   |
|----------------|------------------------------------------------------------------------------------------------------------------------------------------------------------|--------------------------------------------|--------------------------------------------------------------------------|---|
| IDHNBOO + HO2  | → 0.379 HO2 + 0.379 OH + 0.621 LISOPNO3OOH + 0.094 MACRN + 0.242 OHCCH2OH + 0.242 NOA + 0.010 MVKN + 0.033 CH3COCH2OH + 0.033 ETHLN + 0.104 HCHO           | $2.6 \times 10^{-13} \times \exp(1300/T)$  | <sup>1</sup>                                                             | X |
| IDHNBOO + NO   | → 0.302 MACRN + 0.464 NOA + 0.464 OHCCH2OH + 0.024 MVKN + 0.06 ETHLN + 0.06 CH3COCH2OH + 0.85 HO2 + 0.85 NO2 + 0.326 HCHO + 0.15 LISOPNO3NO3               | $2.7 \times 10^{-12} \times \exp(360/T)$   | <sup>1</sup>                                                             | X |
| NISOPHOH + OH  | → IDHNBOO                                                                                                                                                  | $8.72 \times 10^{-12} \times \exp(390/T)$  | <sup>1</sup>                                                             | X |
| NISOPN + OH    | → 0.26 IHNE + 0.26 NO2 + 0.74 NISOPNOO                                                                                                                     | $2.37 \times 10^{-11} \times \exp(390/T)$  | <sup>1</sup>                                                             | X |
| NISOPNOO + NO  | → NOA + 1.11 NO2 + 0.11 OHCCH2OH + 0.89 ETHLN + 0.89 HO2                                                                                                   | $2.7 \times 10^{-12} \times \exp(360/T)$   | <sup>1</sup>                                                             | X |
| NISOPNOO + HO2 | → 0.82 NOA + 0.82 OH + 0.18 NISOPNOOH + 0.09 NO2 + 0.09 OHCCH2OH + 0.73 ETHLN + 0.73 HO2                                                                   | $2.71 \times 10^{-13} \times \exp(1300/T)$ | <sup>1</sup>                                                             | X |
| MACRNOOH + OH  | → CO + OH + NOA                                                                                                                                            | $2.7 \times 10^{-12} \times \exp(470/T)$   | <sup>1</sup>                                                             | X |
| LHMVKNOOH + OH | → OH + MVKN                                                                                                                                                | $5.77 \times 10^{-11}$                     | <sup>1</sup>                                                             | X |
| IHNE + OH      | → 0.19 IHNC1O2 + 0.35 IHNC2O2 + 0.02 IHNC3O2 + 0.14 IHNC4O2 + 0.02 MACRENOL + 0.16 HVMK + 0.26 NO2 + 0.18 HCHO + 0.04 NOA + 0.08 HO2 + 0.08 MGLY + 0.24 CO | $3.22 \times 10^{-11} \times \exp(-400/T)$ | <sup>1</sup>                                                             | X |
| IHNC1O2 + HO2  | → 0.8 ICHNP + 0.2 NOA + 0.2 CO + 0.2 HO2 + 0.2 HCHO + 0.2 OH                                                                                               | $2.6 \times 10^{-13} \times \exp(1300/T)$  | <sup>1</sup>                                                             | X |
| IHNC1O2 + NO   | → 0.0 2LISOPNO3NO3=O + 0.98 NOA + 0.98 CO + 0.98 HO2 + 0.98 HCHO + 0.98 NO2                                                                                | $2.7 \times 10^{-12} \times \exp(360/T)$   | <sup>1</sup>                                                             | X |
| IHNC2O2        | → MACRN + CO + OH                                                                                                                                          | $1. \times 10^7 \times \exp(5000/T)$       | <sup>1</sup>                                                             | X |
| IHNC2O2 + HO2  | → 0.250 NISOPOOH=O + 0.563 MACRN + 0.563 CO + 0.187 NOA + 0.187 OHCCH2OH + 0.75 OH + 0.75 HO2                                                              | $2.6 \times 10^{-13} \times \exp(1300/T)$  | <sup>1</sup>                                                             | X |
| IHNC2O2 + NO   | → 0.98 NO2 + 0.98 HO2 + 0.24 NOA + 0.24 GLY + 0.74 MACRN + 0.74 CO + 0.02 LISOPNO3NO3=O                                                                    | $2.7 \times 10^{-12} \times \exp(360/T)$   | <sup>1</sup>                                                             | X |
| IHNC3O2        | → MVKN + CO + OH                                                                                                                                           | $1.0 \times 10^7 \times \exp(5000/T)$      | <sup>1</sup>                                                             | X |
| IHNC3O2 + HO2  | → 0.15 NISOPOOH=O + 0.638 MVKN + 0.638 CO + 0.212 MGLY + 0.212 ETHLN + 0.85 OH + 0.85 HO2                                                                  | $2.6 \times 10^{-13} \times \exp(1300/T)$  | <sup>1</sup>                                                             | X |
| IHNC3O2 + NO   | → 0.74 MVKN + 0.98 NO2 + 0.98 HO2 + 0.74 CO + 0.24 MGLY + 0.24 ETHLN + 0.02 LISOPNO3NO3=O                                                                  | $2.7 \times 10^{-12} \times \exp(360/T)$   | <sup>1</sup>                                                             | X |
| IHNC4O2 + HO2  | → 0.15 NISOPOOH=O + 0.638 CH3COCH2OH + 0.85 OH + 1.062 CH3C(O)O2 + 0.85 NO2 + 0.212 HO2 + 0.212 HCHO                                                       | $2.6 \times 10^{-13} \times \exp(1300/T)$  | <sup>1</sup> , decomposition of MVK3CO4N-> 2 CH3C(O)O2 + NO <sub>2</sub> | X |

|                     |                                                                                                                                                                                             |                                             |                               |   |
|---------------------|---------------------------------------------------------------------------------------------------------------------------------------------------------------------------------------------|---------------------------------------------|-------------------------------|---|
| IHNC4O2 + NO        | → 1.715 CH3C(O)O2 + 0.245 CH3COCH2OH + 0.735 HO2 + 0.735 HCHO + 1.96 NO2 + 0.02 LISOPNO3NO3=O                                                                                               | $2.7 \times 10^{-12} \times \exp(360/T)$    | <sup>1</sup>                  | X |
| IHNEOOH + OH        | → 0.5 HO2 + 0.5 MACRNOOH + CO + OH + 0.5 NOA                                                                                                                                                | $3.0 \times 10^{-12} \times \exp(20/T)$     | <sup>1</sup>                  | X |
| NISOPNOOH + OH      | → 0.125 OH + 0.125 LISOPNO3NO3=O + 0.875 NISOPNOO                                                                                                                                           | $1.0 \times 10^{-12}$                       | <sup>1</sup>                  | X |
| NC4CHO + OH         | → 1.08 CO + 0.85 HO2 + 0.58 NOA + 0.5 OH + 0.12 HCHO + 0.12 MGLY + 0.17 NO2 + 0.11 MVKN + 0.05 LIECHO + 0.14 CH3C(O)O2 + 0.14 ETHLN                                                         | $4.1 \times 10^{-11}$                       | <sup>9</sup>                  | X |
| NC4CHO + O3         | → 0.555 NOA + 0.89 CO + 0.89 OH + 0.445 MGLY + 0.445 HO2 + 0.075 H2O2 + 0.445 NO2 + 0.52 GLY + 0.035 HOOCCHO                                                                                | $4.4 \times 10^{-18}$                       | <sup>9</sup>                  | X |
| NC4CHO + NO3        | → HNO3 + 0.75 NOA + 0.75 CO + 0.75 HO2 + 0.25 CH3C(O)O2 + 0.25 ETHLN                                                                                                                        | $6.0 \times 10^{-12} \times \exp(-1860/T)$  | <sup>9</sup>                  | X |
| LHC4ACCHO + OH      | → 1.065 OH + 0.355 MGLY + 0.652 CO + 0.297 HO2 + 0.116 LHMVKABOOH + 0.181 MACROOH + 0.35 LC578O2                                                                                            | $4.64 \times 10^{-12} \times \exp(650/T)$   | <sup>1</sup> , 60%A, 40%C     | X |
| LHC4ACCHO + O3      | → 0.2225 CH3C(O)O2 + 0.89 CO + 0.017188 CH2OHCOOH + 0.075625 H2O2 + 0.017188 HOOCCHO + 0.2775 CH3COCH2OH + 0.6675 HO2 + 0.260313 GLY + 0.2225 HCHO + 0.89 OH + 0.260313 OHCCH2OH + 0.5 MGLY | $2.4 \times 10^{-17}$                       | <sup>3</sup>                  |   |
| LHC4ACCHO + NO3     | → HNO3 + LHC4ACCO3                                                                                                                                                                          | $6.12 \times 10^{-12} \times \exp(-1862/T)$ | <sup>3</sup>                  |   |
| LC578O2 + NO        | → 0.02 NISOPHOH=O + 0.98 HO2 + 0.98 NO2 + 0.196 CO + 0.612 MGLY + 0.612 OHCCH2OH + 0.153 MVKOH + 0.043 MACROH + 0.172 GLY + 0.172 CH3COCH2OH                                                | $2.7 \times 10^{-12} \times \exp(360/T)$    | <sup>1</sup> , 78%A, 22%C     | X |
| LC578O2 + NO3       | → HO2 + NO2 + 0.2 CO + 0.624 MGLY + 0.624 OHCCH2OH + 0.156 MVKOH + 0.044 MACROH + 0.176 GLY + 0.176 CH3COCH2OH                                                                              | $2.3 \times 10^{-12}$                       | Analog to NO chemistry        | X |
| LC578O2 + HO2       | → 0.35 LC578OOH + 0.13 CO + 0.65 OH + 0.65 HO2 + 0.101 MVKOH + 0.406 OHCCH2OH + 0.406 MGLY + 0.029 MACROH + 0.114 GLY + 0.114 CH3COCH2OH                                                    | $2.38 \times 10^{-13} \times \exp(1300/T)$  | <sup>1</sup> , 78%A, 22%C     | X |
| LC578O2 + CH3O2     | → 2 HO2 + 0.2 CO + 0.624 MGLY + 0.624 OHCCH2OH + 0.156 MVKOH + 0.044 MACROH + 0.176 GLY + 0.176 CH3COCH2OH + HCHO                                                                           | $1.0 \times 10^{-12}$                       | Analog to other RO2 chemistry | X |
| LC578O2 + CH3C(O)O2 | → HO2 + 0.2 CO + 0.624 MGLY + 0.624 OHCCH2OH + 0.156 MVKOH + 0.044 MACROH + 0.176 GLY + 0.176 CH3COCH2OH + CH3O2                                                                            | $1.0 \times 10^{-11}$                       | Analog to other RO2 chemistry | X |
| LC578O2             | → OH + CO + 0.78 MVKOH + 0.22 MACROH                                                                                                                                                        | $1.0 \times 10^7 \times \exp(-5000/T)$      | <sup>1</sup>                  | X |

|                       |                            |                                                                                                                              |                                                                                  |                                    |   |
|-----------------------|----------------------------|------------------------------------------------------------------------------------------------------------------------------|----------------------------------------------------------------------------------|------------------------------------|---|
| LC578O2               | →                          | HO2 + LIECO3H                                                                                                                | $1.875 \times 10^{13} \times \exp(-1000/T)$                                      | <sup>1</sup>                       | X |
| LC578OOH + OH         | →                          | CO + 0.5 HO2 + 0.5 OH + 0.5 MACROOH + 0.35 MVKOH + 0.15 MACROH                                                               | $1.0 \times 10^{-11}$                                                            | <sup>1</sup>                       | X |
| LHC4ACCO3             | →                          | HO2 + MDIALOOH                                                                                                               | $4.1 \times 10^8 \times \exp(-7700/T)$                                           | <sup>3</sup>                       |   |
| LHC4ACCO3 + NO        | →                          | 0.5 CH3COCH2OH + 0.5 OHCCH2OH + 0.5 CH3C(O)O2 + 0.5 CO + 0.5 HO2 + NO2                                                       | $8.1 \times 10^{-12} \times \exp(270/T)$                                         | <sup>3</sup>                       |   |
| LHC4ACCO3 + NO3       | →                          | 0.5CH3COCH2OH + 0.5OHCCH2OH + 0.5CH3C(O)O2 + 0.5CO + 0.5HO2 + NO2                                                            | $4.0 \times 10^{-12}$                                                            | <sup>3</sup>                       |   |
| LHC4ACCO3 + HO2       | →                          | 0.37 LHC4ACCO3H + 0.13 LHC4ACCO2H + 0.13 O3 + 0.5 OH + 0.25 CH3COCH2OH + 0.25 OHCCH2OH + 0.25 CH3C(O)O2 + 0.25 CO + 0.25 HO2 | $2.8 \times 10^{-12} \times \exp(730/T)$                                         | <sup>6</sup>                       | 2 |
| LHC4ACCO3 + CH3O2     | →                          | HCHO + 0.1 LHC4ACCO2H + 0.45 OHCCH2OH + 0.45 CH3COCH2OH + 0.45 CH3C(O)O2 + 0.45 CO + 1.35 HO2                                | $2.0 \times 10^{-12} \times \exp(500/T)$                                         | <sup>3</sup> , CH3C(O)O2 chemistry | 2 |
| LHC4ACCO3 + CH3C(O)O2 | →                          | 0.5 CH3COCH2OH + 0.5 OHCCH2OH + 0.5 CH3C(O)O2 + 0.5 CO + 0.5 HO2 + CH3O2                                                     | $2.9 \times 10^{-12} \times \exp(500/T)$                                         | <sup>3</sup> , CH3C(O)O2 chemistry | 2 |
| LHC4ACCO3 + NO2       | $\overset{M}{\rightarrow}$ | LC5PAN1719                                                                                                                   | $k_{tro}(3.28 \times 10^{-28}, -6.87, 0, 1.125 \times 10^{-11}, -1.105, 0, 0.3)$ | <sup>3</sup> , CH3C(O)O2 chemistry | 1 |
| LHC4ACCO2H + OH       | →                          | 0.5 CH3COCH2OH + 0.5 OHCCH2OH + 0.5 CH3C(O)O2 + 0.5 CO + 0.5 HO2                                                             | $2.52 \times 10^{-11}$                                                           | <sup>3</sup>                       |   |
| LHC4ACCO3H + OH       | →                          | LHC4ACCO3                                                                                                                    | $2.88 \times 10^{-11}$                                                           | <sup>3</sup>                       |   |
| LC5PAN1719 + OH       | →                          | 0.5 MACROH + 0.5 MVKOH + CO + NO3                                                                                            | $7.79 \times 10^{-11}$                                                           | MCM                                | X |
| LC5PAN1719            | $\overset{M}{\rightarrow}$ | LHC4ACCO3 + NO2                                                                                                              | $k_{tro}(1.1 \times 10^{-5}, 0, -10100, 1.9 \times 10^{17}, 0, -14100, 0.3)$     | MCM                                | X |
| HCOC5 + OH            | →                          | C59O2                                                                                                                        | $2.7 \times 10^{-11} \times \exp(390/T)$                                         | <sup>1</sup>                       | X |
| C59O2 + NO            | →                          | 0.784 CH3COCH2OH + 0.784 CO + 0.98 NO2 + 0.98 HCHO + 0.98 HO2 + 0.196 BIACETOH + 0.02 NISOPOHOH=O                            | $2.7 \times 10^{-12} \times \exp(360/T)$                                         | <sup>1</sup>                       | X |
| C59O2 + NO3           | →                          | 0.8 CH3COCH2OH + 0.8 CO + NO2 + HCHO + HO2 + 0.2 BIACETOH                                                                    | $2.3 \times 10^{-12}$                                                            | Analog to RO2 chemistry            | X |
| C59O2 + HO2           | →                          | 0.35 LC578OOH + 0.65 OH + 0.13 BIACETOH + 0.65 HCHO + 0.65 HO2 + 0.52 CH3COCH2OH + 0.52 CO                                   | $2.38 \times 10^{-13} \times \exp(1300/T)$                                       | <sup>1</sup>                       | X |
| C59O2 + CH3O2         | →                          | 0.8 CH3COCH2OH + 0.8 CO + 2 HCHO + 2 HO2 + 0.2 BIACETOH                                                                      | $1.0 \times 10^{-12}$                                                            | Analog to RO2 chemistry            | X |

|                    |                                                                                                                                                  |                                              |                           |   |
|--------------------|--------------------------------------------------------------------------------------------------------------------------------------------------|----------------------------------------------|---------------------------|---|
| C59O2 + CH3C(O)O2  | → 0.8 CH3COCH2OH + 0.8 CO + HCHO + HO2 + 0.2 BIACETOH + CH3O2                                                                                    | $1.0 \times 10^{-11}$                        | Analog to RO2 chemistry   | X |
| C59O2              | → HO2 + CO + CO + CH3COCH2OH + OH                                                                                                                | $1.875 \times 10^{13} \times \exp(-10000/T)$ | <sup>1</sup>              | X |
| HPALD + OH         | → 0.856 OH + 0.385 MDIALOOH + 0.256 BIGALD3 + 0.215 LIECO3H + 0.144 HO2 + 0.144 GLY + 0.144 CC(=O)COO                                            | $5.2 \times 10^{-11}$                        | MCM; 60%HPALD1, 40%HPALD2 | X |
| HPALD + NO3        | → MDIALOOH + OH + HNO3                                                                                                                           | $5.95 \times 10^{-12} \times \exp(-1862/T)$  | MCM; 60%HPALD1, 40%HPALD2 | X |
| HPALD + O3         | → 0.438 HCOCH2OOH + 0.39 CH3C(O)O2 + 0.502 MGLY + 0.096 HO2 + 0.582 CO + 1.394 OH + 0.466 GLY + 0.108 CC(=O)COO                                  | $2.4 \times 10^{-17}$                        | MCM; 60%HPALD1, 40%HPALD2 | X |
| LISOPOOHOOH + OH   | → 0.333 LC578OOH + 0.667 DHHPEPOX + OH                                                                                                           | $3.0 \times 10^{-12}$                        | <sup>1</sup>              | X |
| LISOPACNO3O2 + NO  | → 0.884 HO2 + 0.884 NO2 + 0.116 LISOPNO3NO3 + 0.304 NOA + 0.304 OHCCH2OH + 0.022 MACRN + 0.1 HCHO + 0.48 CH3COCH2OH + 0.48 ETHLN + 0.079 MVKN    | $2.7 \times 10^{-12} \times \exp(360/T)$     | <sup>1</sup> , 60%A, 40%C | X |
| LISOPACNO3O2       | → HO2 + NISOPOOH=O                                                                                                                               | $1.875 \times 10^{13} \times \exp(-10000/T)$ | <sup>1</sup>              | X |
| LISOPACNO3O2 + HO2 | → 0.533 HO2 + 0.533 OH + 0.467 LISOPNO3OOH + 0.193 NOA + 0.193 OHCCH2OH + 0.011 MACRN + 0.053 HCHO + 0.287 CH3COCH2OH + 0.287 ETHLN + 0.042 MVKN | $2.6 \times 10^{-13} \times \exp(1300/T)$    | <sup>1</sup>              | X |
| LISOPNO3NO3 + OH   | → LISOPNO3NO3=O                                                                                                                                  | $2.0 \times 10^{-12}$                        | <sup>1</sup>              | X |
| LISOPNO3NO3=O + OH | → CO + NO2 + 0.5 MACRN + 0.5 MVKN                                                                                                                | $4.0 \times 10^{-12}$                        | <sup>1</sup>              | X |
| LISOPNO3OOH + OH   | → 0.33 OH + 0.67 HO2 + 0.33 NISOPOHOH=O + 0.67 NISOPOOH=O                                                                                        | $3.0 \times 10^{-12}$                        | <sup>1</sup>              | X |
| NISOPOHOH=O + OH   | → CO + NO2 + 0.75 MVKOH + 0.25 MACROH                                                                                                            | $1.0 \times 10^{-11}$                        | <sup>1</sup>              | X |

|              |                                                                     |                                           |                            |   |
|--------------|---------------------------------------------------------------------|-------------------------------------------|----------------------------|---|
| C6 chemistry |                                                                     |                                           |                            |   |
| BENZ + OH    | → 0.327 BENZO2 + 0.14 BEPOMUC + 0.14 HO2 + 0.533 PHENOL + 0.533 HO2 | $2.3 \times 10^{-12} \times \exp(-190/T)$ | <sup>10</sup> , MCM, IUPAC | X |
| PHENOL + OH  | → 0.06 C6H5O + 0.8 CATECHOL + 0.8 HO2 + 0.14 PHENO2                 | $4.7 \times 10^{-13} \times \exp(1220/T)$ | <sup>3</sup> , MCM         |   |
| PHENOL + NO3 | → 0.742 C6H5O + 0.742 HNO3 + 0.258 NPHENOLO2                        | $3.8 \times 10^{-12}$                     | MCM                        | X |
| PHENO2 + NO  | → 0.71 BIGACID1 + 0.71 GLY + NO2 + HO2 + 0.29 BZQONE                | $2.7 \times 10^{-12} \times \exp(360/T)$  | MCM                        | X |
| PHENO2 + NO3 | → 0.71 BIGACID1 + 0.71 GLY + NO2 + HO2 + 0.29 BZQONE                | $2.3 \times 10^{-12}$                     | MCM                        | X |

|                      |   |                                                       |                                            |                    |   |
|----------------------|---|-------------------------------------------------------|--------------------------------------------|--------------------|---|
| PHENO2 + HO2         | → | PHENOOH                                               | $2.24 \times 10^{-13} \times \exp(1300/T)$ | MCM                | X |
| PHENO2 + CH3O2       | → | 2 HO2 + HCHO + 0.71 BIGACID1 + 0.71 GLY + 0.29 BZQONE | $1.0 \times 10^{-12}$                      | MCM, RO2 chemistry | X |
| PHENO2 + CH3C(O)O2   | → | HO2 + 0.71 BIGACID1 + 0.71 GLY + CH3O2 + 0.29 BZQONE  | $1.0 \times 10^{-11}$                      | MCM, RO2 chemistry | X |
| PHENOOH + OH         | → | PHENO2                                                | $1.16 \times 10^{-10}$                     | MCM                | X |
| NPHENOLO2+ NO        | → | BIGACID1 + GLY + 2 NO2                                | $2.7 \times 10^{-12} \times \exp(360/T)$   | MCM                | X |
| NPHENOLO2+ NO3       | → | BIGACID1 + GLY + 2 NO2                                | $2.3 \times 10^{-12}$                      | MCM                | X |
| NPHENOLO2+ HO2       | → | NPHENOLOOH                                            | $2.24 \times 10^{-13} \times \exp(1300/T)$ | MCM                | X |
| NPHENOLO2+ CH3O2     | → | 2 HO2 + HCHO + BIGACID1 + GLY + NO2                   | $1.0 \times 10^{-12}$                      | MCM, RO2 chemistry | X |
| NPHENOLO2+ CH3C(O)O2 | → | HO2 + BIGACID1 + GLY + NO2 + CH3O2                    | $1.0 \times 10^{-11}$                      | MCM, RO2 chemistry | X |
| NPHENOLOOH+ OH       | → | NPHENOLO2                                             | $1.07 \times 10^{-10}$                     | MCM                | X |
| BZQONE + NO3         | → | NBZQO2                                                | $3.0 \times 10^{-13}$                      | MCM                | X |
| BZQONE + OH          | → | BZQO2                                                 | $4.6 \times 10^{-12}$                      | MCM, IUPAC         | X |
| NBZQO2 + HO2         | → | NBZQOOH                                               | $2.24 \times 10^{-13} \times \exp(1300/T)$ | MCM                | X |
| NBZQO2 + NO          | → | C6CO4DB+ 2 NO2                                        | $2.7 \times 10^{-12} \times \exp(360/T)$   | MCM                | X |
| NBZQO2 + NO3         | → | 2 NO2 + C6CO4DB                                       | $2.3 \times 10^{-12}$                      | MCM                | X |
| NBZQO2 + CH3O2       | → | NO2 + C6CO4DB + HO2 + HCHO                            | $1.0 \times 10^{-12}$                      | MCM, RO2 chemistry | X |
| NBZQO2 + CH3C(O)O2   | → | NO2 + C6CO4DB + CH3O2                                 | $1.0 \times 10^{-11}$                      | MCM, RO2 chemistry | X |
| NBZQOOH + OH         | → | NBZQO2                                                | $6.68 \times 10^{-11}$                     | MCM                | X |
| BZQO2 + HO2          | → | BZQOOH                                                | $2.24 \times 10^{-13} \times \exp(1300/T)$ | MCM                | X |
| BZQO2 + NO           | → | HO2 + CO + NO2 + HOCOC4DIAL                           | $2.7 \times 10^{-12} \times \exp(360/T)$   | MCM                | X |
| BZQO2 + NO3          | → | HO2 + CO + NO2 + HOCOC4DIAL                           | $2.3 \times 10^{-12}$                      | MCM                | X |
| BZQO2 + CH3O2        | → | HO2 + CO + HOCOC4DIAL + HO2 + HCHO                    | $1.0 \times 10^{-12}$                      | MCM, RO2 chemistry | X |
| BZQO2 + CH3C(O)O2    | → | HO2 + CO + HOCOC4DIAL + CH3O2                         | $1.0 \times 10^{-11}$                      | MCM, RO2 chemistry | X |
| BZQOOH + OH          | → | BZQCO + OH                                            | $1.23 \times 10^{-10}$                     | MCM                | X |
| BZQCO + OH           | → | HO2 + CO + HOCOC4DIAL                                 | $6.07 \times 10^{-11}$                     | MCM                | X |
| C6CO4DB + OH         | → | 3 CO + HO2 + C33CO                                    | $7.7 \times 10^{-11}$                      | MCM                | X |
| C6H5O + NO2          | → | NPHEN                                                 | $1.0 \times 10^{-12}$                      | 10                 | X |



|                    |   |                                                                           |                                            |                                   |   |
|--------------------|---|---------------------------------------------------------------------------|--------------------------------------------|-----------------------------------|---|
| C6H5O + HO2        | → | PHENOL                                                                    | $2.3 \times 10^{-13}$                      | <sup>10</sup>                     | X |
| C6H5O + O3         | → | C6H5O2                                                                    | $2.9 \times 10^{-13}$                      | <sup>10</sup>                     | X |
| NPHEN + OH         | → | NPHENO                                                                    | $9.0 \times 10^{-13}$                      | MCM                               | X |
| NPHEN + NO3        | → | NPHENO + HNO3                                                             | $9.0 \times 10^{-14}$                      | MCM                               | X |
| C6H5O2 + HO2       | → | C6H5OOH                                                                   | $2.24 \times 10^{-13} \times \exp(1300/T)$ | MCM                               | X |
| C6H5O2 + NO        | → | C6H5O + NO2                                                               | $2.7 \times 10^{-12} \times \exp(360/T)$   | MCM                               | X |
| C6H5O2 + NO3       | → | C6H5O + NO2                                                               | $2.3 \times 10^{-12}$                      | <sup>3</sup> , MCM                |   |
| C6H5O2 + CH3O2     | → | C6H5O + HO2 + HCHO                                                        | $1.0 \times 10^{-12}$                      | <sup>3</sup> , MCM, RO2 chemistry |   |
| C6H5O2 + CH3C(O)O2 | → | C6H5O + CH3O2                                                             | $1.0 \times 10^{-11}$                      | <sup>3</sup> , MCM, RO2 chemistry |   |
| C6H5OOH + OH       | → | C6H5O2                                                                    | $3.6 \times 10^{-12}$                      | MCM                               | X |
| BENZO2 + HO2       | → | BENZO2                                                                    | $2.24 \times 10^{-13} \times \exp(1300/T)$ | MCM                               | X |
| BENZO2 + NO        | → | 0.92 GLY + 0.92 NO2 + 0.46 BIGALD1 + 0.92 HO2 + 0.46 BZFUONE + 0.08 BENZN | $2.7 \times 10^{-12} \times \exp(360/T)$   | MCM                               | X |
| BENZO2 + NO3       | → | GLY + NO2 + 0.5 BIGALD1 + HO2 + 0.5 BZFUONE                               | $2.3 \times 10^{-12}$                      | MCM                               | X |
| BENZO2 + CH3O2     | → | GLY + 0.5 BIGALD1 + 2 HO2 + HCHO + 0.5 BZFUONE                            | $1.0 \times 10^{-12}$                      | MCM, RO2 chemistry                | X |
| BENZO2 + CH3C(O)O2 | → | GLY + 0.5 BIGALD1 + HO2 + CH3O2 + 0.5 BZFUONE                             | $1.0 \times 10^{-11}$                      | MCM, RO2 chemistry                | X |
| BENZO2 + OH        | → | 1.4 GLY + 0.6 MALANHY + HO2 + 0.4 CO                                      | $9.77 \times 10^{-11}$                     | MCM                               | X |
| BENZ=O + OH        | → | NO2 + BENZ=O                                                              | $7.3 \times 10^{-11}$                      | MCM                               | X |
| BENZ=O + HO2       | → | GLY + MALO2 + HO2                                                         | $8.16 \times 10^{-11}$                     | MCM                               | X |
| CATECHOL + OH      | → | CATEC1O                                                                   | $1.0 \times 10^{-10}$                      | <sup>3</sup> , MCM, IUPAC         |   |
| CATECHOL + NO3     | → | CATEC1O + HNO3                                                            | $9.9 \times 10^{-11}$                      | <sup>3</sup> , MCM                |   |
| CATEC1O + NO2      | → | NCATECHOL                                                                 | $2.08 \times 10^{-12}$                     | MCM                               | X |
| CATEC1O + O3       | → | CATEC1O2                                                                  | $2.86 \times 10^{-13}$                     | MCM                               | X |
| NCATECHOL + OH     | → | NCATECO2                                                                  | $3.47 \times 10^{-12}$                     | MCM                               | X |
| NCATECHOL + NO3    | → | DNCATECO2                                                                 | $2.6 \times 10^{-12}$                      | MCM                               | X |
| NCATECO2 + HO2     | → | NAROMOLOOH                                                                | $2.24 \times 10^{-13} \times \exp(1300/T)$ | MCM                               | X |
| NCATECO2 + NO      | → | 2 NO2 + HOOCCHO + HO2 + MALANHY                                           | $2.7 \times 10^{-12} \times \exp(360/T)$   | MCM                               | X |
| NCATECO2 + NO3     | → | 2 NO2 + HOOCCHO + HO2 + MALANHY                                           | $2.3 \times 10^{-12}$                      | MCM                               | X |

|                                                            |   |                                                                                        |                                            |                                               |   |
|------------------------------------------------------------|---|----------------------------------------------------------------------------------------|--------------------------------------------|-----------------------------------------------|---|
| NCATECO <sub>2</sub> + CH <sub>3</sub> O <sub>2</sub>      | → | NO <sub>2</sub> + HOOCCHO + 2 HO <sub>2</sub> + MALANHY + HCHO                         | $1.0 \times 10^{-12}$                      | MCM, RO <sub>2</sub> chemistry                | X |
| NCATECO <sub>2</sub> + CH <sub>3</sub> C(O)O <sub>2</sub>  | → | NO <sub>2</sub> + HOOCCHO + HO <sub>2</sub> + MALANHY + CH <sub>3</sub> O <sub>2</sub> | $1.0 \times 10^{-11}$                      | MCM, RO <sub>2</sub> chemistry                | X |
| DNCATECO <sub>2</sub> + HO <sub>2</sub>                    | → | NAROMOLOOH                                                                             | $2.24 \times 10^{-13} \times \exp(1300/T)$ | MCM                                           | X |
| DNCATECO <sub>2</sub> + NO                                 | → | 3 NO <sub>2</sub> + HOOCCHO + MALANHY                                                  | $2.7 \times 10^{-12} \times \exp(360/T)$   | MCM                                           | X |
| DNCATECO <sub>2</sub> + NO <sub>3</sub>                    | → | 3 NO <sub>2</sub> + HOOCCHO + MALANHY                                                  | $2.3 \times 10^{-12}$                      | MCM                                           | X |
| DNCATECO <sub>2</sub> + CH <sub>3</sub> O <sub>2</sub>     | → | 2 NO <sub>2</sub> + HOOCCHO + MALANHY + HO <sub>2</sub> + HCHO                         | $1.0 \times 10^{-12}$                      | MCM, RO <sub>2</sub> chemistry                | X |
| DNCATECO <sub>2</sub> + CH <sub>3</sub> C(O)O <sub>2</sub> | → | 2 NO <sub>2</sub> + HOOCCHO + MALANHY + CH <sub>3</sub> O <sub>2</sub>                 | $1.0 \times 10^{-11}$                      | MCM, RO <sub>2</sub> chemistry                | X |
| CATEC1O <sub>2</sub> + HO <sub>2</sub>                     | → | CATEC1OOH                                                                              | $2.24 \times 10^{-13} \times \exp(1300/T)$ | MCM                                           | X |
| CATEC1O <sub>2</sub> + NO                                  | → | CATEC1O + NO <sub>2</sub>                                                              | $2.7 \times 10^{-12} \times \exp(360/T)$   | MCM                                           | X |
| CATEC1O <sub>2</sub> + NO <sub>3</sub>                     | → | CATEC1O + NO <sub>2</sub>                                                              | $2.3 \times 10^{-12}$                      | <sup>3</sup> , MCM                            |   |
| CATEC1O <sub>2</sub> + CH <sub>3</sub> O <sub>2</sub>      | → | CATEC1O + HO <sub>2</sub> + HCHO                                                       | $1.0 \times 10^{-12}$                      | <sup>3</sup> , MCM, RO <sub>2</sub> chemistry |   |
| CATEC1O <sub>2</sub> + CH <sub>3</sub> C(O)O <sub>2</sub>  | → | CATEC1O + CH <sub>3</sub> O <sub>2</sub>                                               | $1.0 \times 10^{-11}$                      | <sup>3</sup> , MCM, RO <sub>2</sub> chemistry |   |
| CATEC1OOH + OH                                             | → | CATEC1O <sub>2</sub>                                                                   | $1.9 \times 10^{-12} \times \exp(190/T)$   | <sup>3</sup> , MCM                            |   |
| NPHENO <sub>2</sub> + HO <sub>2</sub>                      | → | NPHENO <sub>2</sub> OH                                                                 | $2.24 \times 10^{-13} \times \exp(1300/T)$ | MCM                                           | X |
| NPHENO + O <sub>3</sub>                                    | → | NPHENO <sub>2</sub>                                                                    | $2.86 \times 10^{-13}$                     | MCM                                           | X |
| NPHENO + NO <sub>2</sub>                                   | → | N <sub>2</sub> PHEN                                                                    | $2.08 \times 10^{-12}$                     | MCM                                           | X |
| NPHENO <sub>2</sub> OH + OH                                | → | NPHENO <sub>2</sub>                                                                    | $9.0 \times 10^{-13}$                      | MCM                                           | X |
| NPHENO <sub>2</sub> + NO                                   | → | NPHENO + NO <sub>2</sub>                                                               | $2.7 \times 10^{-12} \times \exp(360/T)$   | MCM                                           | X |
| NPHENO <sub>2</sub> + NO <sub>3</sub>                      | → | NPHENO + NO <sub>2</sub>                                                               | $2.3 \times 10^{-12}$                      | MCM                                           | X |
| NPHENO <sub>2</sub> + CH <sub>3</sub> O <sub>2</sub>       | → | NPHENO + HO <sub>2</sub> + HCHO                                                        | $1.0 \times 10^{-12}$                      | MCM, RO <sub>2</sub> chemistry                | X |
| NPHENO <sub>2</sub> + CH <sub>3</sub> C(O)O <sub>2</sub>   | → | NPHENO + CH <sub>3</sub> O <sub>2</sub>                                                | $1.0 \times 10^{-11}$                      | MCM, RO <sub>2</sub> chemistry                | X |
| N <sub>2</sub> PHEN + OH                                   | → | DNCATECO <sub>2</sub>                                                                  | $3.0 \times 10^{-14}$                      | MCM                                           | X |
| N <sub>2</sub> PHEN + NO <sub>3</sub>                      | → | NDNPHENO <sub>2</sub>                                                                  | $2.25 \times 10^{-12}$                     | MCM                                           | X |
| NDNPHENO <sub>2</sub> + HO <sub>2</sub>                    | → | NAROMOLOOH                                                                             | $2.24 \times 10^{-13} \times \exp(1300/T)$ | MCM, NAROMOLOOH<br>no further oxidation       | X |
| NDNPHENO <sub>2</sub> + NO                                 | → | 3 NO <sub>2</sub> + HNO <sub>3</sub> + 2 CO + MALANHY                                  | $2.7 \times 10^{-12} \times \exp(360/T)$   | MCM                                           | X |
| NDNPHENO <sub>2</sub> + NO <sub>3</sub>                    | → | 3 NO <sub>2</sub> + HNO <sub>3</sub> + 2 CO + MALANHY                                  | $2.3 \times 10^{-12}$                      | MCM                                           | X |

|                       |   |                                                                                                   |                                            |                    |   |
|-----------------------|---|---------------------------------------------------------------------------------------------------|--------------------------------------------|--------------------|---|
| NDNPHENO2 + CH3O2     | → | 2 NO2 + HNO3 + 2 CO + MALANHY + HO2 + HCHO                                                        | $1.0 \times 10^{-12}$                      | MCM, RO2 chemistry | X |
| NDNPHENO2 + CH3C(O)O2 | → | 2 NO2 + HNO3 + 2 CO + MALANHY + CH3O2                                                             | $1.0 \times 10^{-11}$                      | MCM, RO2 chemistry | X |
| BIGALD4 + OH          | → | 0.7 CH3C(O)O2 + 0.7 CO2H3CHO + 0.6 MGLY + 0.3 HO2                                                 | $4.9 \times 10^{-11}$                      | MCM                | X |
| BIGALD4 + O3          | → | 1.0675 MGLY + 0.125 CH3CHO + 0.57 OH + 0.57 CO + 0.695 CH3C(O)O2 + 0.0675 H2O2 + 0.1125 CH3COCO2H | $5.0 \times 10^{-18}$                      | MCM                | X |
| BIGACID3 + OH         | → | 0.65 MALANHY + 0.65 CH3O2 + 0.35 CH3C(O)O2 + 0.35 HO2 + 0.35 HCHO + 0.7 CO                        | $5.08 \times 10^{-11}$                     | MCM                | X |
| C615CO2O2+ HO2        | → | C615CO2OOH                                                                                        | $2.24 \times 10^{-13} \times \exp(1300/T)$ | MCM                | X |
| C615CO2O2+ NO         | → | BIGALD2 + CO + HO2 + NO2                                                                          | $2.7 \times 10^{-12} \times \exp(360/T)$   | MCM                | X |
| C615CO2O2+ NO3        | → | BIGALD2 + CO + HO2 + NO2                                                                          | $2.3 \times 10^{-12}$                      | MCM                | X |
| C615CO2O2+ CH3O2      | → | 0.8 HCHO + 0.2 CH3OH + 0.7 BIGALD2 + CO + 1.8 HO2 + 0.3 DICARBO2                                  | $1.0 \times 10^{-12}$                      | MCM, RO2 chemistry | X |
| C615CO2O2+ CH3C(O)O2  | → | 0.8 CH3O2 + 0.2 CH3COOH + 0.8 BIGALD2 + CO + HO2 + 0.2 DICARBO2                                   | $1.0 \times 10^{-11}$                      | MCM, RO2 chemistry | X |
| C615CO2OOH+ OH        | → | OH + DICARBO2 + CO + HO2                                                                          | $9.42 \times 10^{-11}$                     | MCM                | X |

|                    |   |                                                                                      |                                              |                                     |   |
|--------------------|---|--------------------------------------------------------------------------------------|----------------------------------------------|-------------------------------------|---|
| C7 chemistry       |   |                                                                                      |                                              |                                     |   |
| TOL + OH           | → | 0.063 BZALD + 0.063 HO2 + 0.1914 CRESOL + 0.4171 HO2 + 0.2237 TEPOMUC + 0.5219 TOLO2 | $1.8 \times 10^{-12} \times \exp(340/T)$     | <sup>10</sup> , IUPAC               | X |
| CRESOL + OH        | → | 0.2 CRESO2 + 0.727 CATECHOL + 0.727 HO2 + 0.073 C6H5O                                | $1.6 \times 10^{-12} \times \exp(970/T)$     | <sup>10</sup> , MCM, IUPAC o-cresol | X |
| CRESOL + NO3       | → | 0.103 CRESO2 + 0.391 C6H5O + 0.494 HNO3 + 0.506 NCRESO2                              | $1.4 \times 10^{-11}$                        | MCM                                 | X |
| CRESO2 + HO2       | → | CRESOOH                                                                              | $2.3862 \times 10^{-13} \times \exp(1300/T)$ | MCM                                 | X |
| CRESO2 + NO        | → | 0.68 BIGACID2 + 0.68 GLY + NO2 + HO2 + 0.32 BZQONE                                   | $2.7 \times 10^{-12} \times \exp(360/T)$     | MCM                                 | X |
| CRESO2 + NO3       | → | 0.68 BIGACID2 + 0.68 GLY + NO2 + HO2 + 0.32 BZQONE                                   | $2.3 \times 10^{-12}$                        | MCM                                 | X |
| CRESO2 + CH3O2     | → | 2 HO2 + HCHO + 0.68 BIGACID2 + 0.68 GLY + 0.32 BZQONE                                | $1.0 \times 10^{-12}$                        | MCM, RO2 chemistry                  | X |
| CRESO2 + CH3C(O)O2 | → | HO2 + 0.68 BIGACID2 + 0.68 GLY + CH3O2 + 0.32 BZQONE                                 | $1.0 \times 10^{-11}$                        | MCM, RO2 chemistry                  | X |
| CRESOOH + OH       | → | CRESO2                                                                               | $1.15 \times 10^{-10}$                       | MCM                                 | X |
| NCRESO2+ HO2       | → | NCRESOOH                                                                             | $2.4 \times 10^{-13} \times \exp(1300/T)$    | MCM                                 | X |

|                    |                |                                                                                                                                    |                                                                                  |                                         |   |
|--------------------|----------------|------------------------------------------------------------------------------------------------------------------------------------|----------------------------------------------------------------------------------|-----------------------------------------|---|
| NCRESO2+ NO        | →              | 2 NO2 + BIGACID2 + GLY                                                                                                             | $2.7 \times 10^{-12} \times \exp(360/T)$                                         | MCM                                     | X |
| NCRESO2+ NO3       | →              | 2 NO2 + BIGACID2 + GLY                                                                                                             | $2.3 \times 10^{-12}$                                                            | MCM                                     | X |
| NCRESO2+ CH3O2     | →              | HO2 + HCHO + NO2 + 0.771 MGLY + 0.771 BIGACID2 + 0.229 GLY + 0.229 BIGACID3                                                        | $1.0 \times 10^{-12}$                                                            | MCM, RO2 chemistry                      | X |
| NCRESO2+ CH3C(O)O2 | →              | NO2 + 0.771 MGLY + 0.771 BIGACID2 + 0.229 GLY + 0.229 BIGACID3 + CH3O2                                                             | $1.0 \times 10^{-11}$                                                            | MCM, RO2 chemistry                      | X |
| NCRESOOH+ OH       | →              | NCRESO2                                                                                                                            | $1.1 \times 10^{-10}$                                                            | MCM                                     | X |
| TOLO2 + HO2        | →              | TOLOOH                                                                                                                             | $2.3862 \times 10^{-13} \times \exp(1300/T)$                                     | MCM                                     | X |
| TOLO2 + NO         | →              | 0.889 NO2 + 0.53 GLY + 0.36 MGLY + 0.889 HO2 + 0.18 BIGALD1 + 0.18 BIGALD2 + 0.18 BIGALD3 + 0.18 BZFUONE + 0.18 FUONE + 0.111 TOLN | $2.7 \times 10^{-12} \times \exp(360/T)$                                         | MCM                                     | X |
| TOLO2 + NO3        | →              | NO2 + 0.6 GLY + 0.4 MGLY + HO2 + 0.2 BIGALD1 + 0.2 BIGALD2 + 0.2 BIGALD3 + 0.2 BZFUONE + 0.2 FUONE                                 | $2.3 \times 10^{-12}$                                                            | MCM                                     | X |
| TOLO2 + CH3O2      | →              | 0.6 GLY + 0.4 MGLY + 2 HO2 + 0.2 BIGALD1 + 0.2 BIGALD2 + 0.2 BIGALD3 + HCHO + 0.2 BZFUONE + 0.2 FUONE                              | $1.0 \times 10^{-12}$                                                            | MCM, RO2 chemistry                      | X |
| TOLO2 + CH3C(O)O2  | →              | 0.6 GLY + 0.4 MGLY + HO2 + 0.2 BIGALD1 + 0.2 BIGALD2 + 0.2 BIGALD3 + CH3O2 + 0.2 BZFUONE + 0.2 FUONE                               | $1.0 \times 10^{-11}$                                                            | MCM, RO2 chemistry                      | X |
| TOLOOH + OH        | →              | GLY + DICARBO2                                                                                                                     | $9.64 \times 10^{-11}$                                                           | MCM                                     | X |
| TOLN + OH          | →              | NO2 + TOL=O                                                                                                                        | $7.16 \times 10^{-11}$                                                           | MCM                                     | X |
| TOL=O + OH         | →              | GLY + DICARBO2                                                                                                                     | $7.99 \times 10^{-11}$                                                           | MCM                                     | X |
| BZALD + OH         | →              | ACBZO2                                                                                                                             | $5.9 \times 10^{-12} \times \exp(225/T)$                                         | <sup>3</sup> , MCM, IUPAC               |   |
| BZALD + NO3        | →              | ACBZO2 + HNO3                                                                                                                      | $2.4 \times 10^{-15}$                                                            | MCM                                     | X |
| ACBZO2 + HO2       | →              | 0.5 C6H5O2 + 0.5 OH + 0.37 ACBZOOH + 0.13 O3 + 0.13 PHCOOH                                                                         | $1.1 \times 10^{-11} \times \exp(364/T)$                                         | <sup>6</sup> , MCM, CH3C(O)O2 chemistry | 2 |
| ACBZO2 + NO        | →              | C6H5O2 + NO2                                                                                                                       | $7.5 \times 10^{-12} \times \exp(290/T)$                                         | <sup>3</sup>                            |   |
| ACBZO2 + NO3       | →              | C6H5O2 + NO2                                                                                                                       | $4.0 \times 10^{-12}$                                                            | MCM                                     |   |
| ACBZO2 + NO2       | → <sup>M</sup> | PBZNIT                                                                                                                             | $k_{tro}(3.28 \times 10^{-28}, -6.87, 0, 1.125 \times 10^{-11}, -1.105, 0, 0.3)$ | MCM, CH3C(O)O2 chemistry                | 1 |
| ACBZO2 + CH3O2     | →              | 0.9 C6H5O2 + 0.9 HO2 + HCHO + 0.1 PHCOOH                                                                                           | $2.0 \times 10^{-12} \times \exp(500/T)$                                         | MCM, CH3C(O)O2 chemistry                | 2 |

|                    |                   |                    |                                                                              |                                         |   |
|--------------------|-------------------|--------------------|------------------------------------------------------------------------------|-----------------------------------------|---|
| ACBZO2 + CH3C(O)O2 | →                 | C6H5O2 + CH3O2     | $2.9 \times 10^{-12} \times \exp(500/T)$                                     | MCM, CH3C(O)O2 chemistry                | 2 |
| PHCOOH + OH        | →                 | C6H5O2             | $1.1 \times 10^{-12}$                                                        | MCM                                     | X |
| ACBZOOH + OH       | →                 | ACBZO2             | $4.66 \times 10^{-12}$                                                       | MCM                                     | X |
| PBZNIT + OH        | →                 | C6H5OOH + CO + NO2 | $1.06 \times 10^{-12}$                                                       | MCM                                     | X |
| PBZNIT             | $\xrightarrow{M}$ | ACBZO2 + NO2       | $k_{tro}(1.1 \times 10^{-5}, 0, -10100, 1.9 \times 10^{17}, 0, -14100, 0.3)$ | <sup>3</sup> , MCM, CH3C(O)O2 chemistry |   |

|                     |   |                                                                                                                                                                                                       |                                           |                                                                 |   |
|---------------------|---|-------------------------------------------------------------------------------------------------------------------------------------------------------------------------------------------------------|-------------------------------------------|-----------------------------------------------------------------|---|
| C8 chemistry        |   |                                                                                                                                                                                                       |                                           |                                                                 |   |
| XYL + OH            | → | 0.15 XYLOL + 0.23 TEPOMUC + 0.06 BZALD + 0.06 HO2 + 0.56 XYLENO2 + 0.38 HO2                                                                                                                           | $7.3 \times 10^{-12} \times \exp(355/T)$  | <sup>3,13</sup> , see sect. 4.1.1, RACM                         | X |
| XYLOL + OH          | → | 0.33 CRESO2 + 0.6 CATECHOL + 0.6 HO2 + 0.07 C6H5O                                                                                                                                                     | $8.4 \times 10^{-11}$                     | <sup>3</sup> , MCM, XYLOLO2 approximated with CRESO2            | X |
| XYLOL + NO3         | → | 0.1 CRESO2 + 0.39 C6H5O + 0.49 HNO3 + 0.51 NCRESO2                                                                                                                                                    | $3.91 \times 10^{-11}$                    | MCM, XYLOLO2 approximated with CRESO2 and NXYLOLO2 with NCRESO2 | X |
| XYLENO2 + HO2       | → | XYLENOOH                                                                                                                                                                                              | $2.5 \times 10^{-13} \times \exp(1300/T)$ | MCM                                                             | X |
| XYLENO2 + NO        | → | 0.138 XYLNO3 + 0.293 GLY + 0.491 MGLY + 0.043 BIGALD1 + 0.147 BIGALD2 + 0.138 BIGALD3 + 0.233 BIGALD4 + 0.862 NO2 + 0.862 HO2 + 0.259 FUONE + 0.043 BZFUONE + 0.081 CO + 0.081 CH3C(O)O2 + 0.081 HCHO | $2.7 \times 10^{-12} \times \exp(360/T)$  | MCM                                                             | X |
| XYLENO2 + NO3       | → | HO2 + 0.34 GLY + 0.57 MGLY + 0.05 BIGALD1 + 0.17 BIGALD2 + 0.16 BIGALD3 + 0.27 BIGALD4 + 0.09 CO + 0.09 CH3C(O)O2 + 0.09 HCHO + 0.3 FUONE + 0.05 BZFUONE + NO2                                        | $2.3 \times 10^{-12}$                     | MCM                                                             | X |
| XYLENO2 + CH3O2     | → | 2 HO2 + HCHO + 0.34 GLY + 0.57 MGLY + 0.05 BIGALD1 + 0.17 BIGALD2 + 0.16 BIGALD3 + 0.27 BIGALD4 + 0.09 CO + 0.09 CH3C(O)O2 + 0.09 HCHO + 0.3 FUONE + 0.05 BZFUONE                                     | $1.0 \times 10^{-12}$                     | MCM, RO2 chemistry                                              | X |
| XYLENO2 + CH3C(O)O2 | → | HO2 + 0.34 GLY + 0.57 MGLY + 0.05 BIGALD1 + 0.17 BIGALD2 + 0.16 BIGALD3 + 0.27 BIGALD4 + 0.09 CO + 0.09 CH3C(O)O2 + 0.09 HCHO + 0.3 FUONE + 0.05 BZFUONE + CH3O2                                      | $1.0 \times 10^{-11}$                     | MCM, RO2 chemistry                                              | X |

|               |                                                           |                        |     |   |
|---------------|-----------------------------------------------------------|------------------------|-----|---|
| XYLENOOH + OH | → 0.48 XYLENO2 + 0.52 MGLY + 0.26 MDIALO2 + 0.26 DICARBO2 | $9.3 \times 10^{-11}$  | MCM | X |
| XYLNO3 + OH   | → NO2 + TOL=O + 0.59 CH3O2                                | $7.19 \times 10^{-11}$ | MCM | X |

| C10/C15 chemistry |                                                                                                                                                                        |                                             |                       |   |
|-------------------|------------------------------------------------------------------------------------------------------------------------------------------------------------------------|---------------------------------------------|-----------------------|---|
| APIN + OH         | → TERPO2                                                                                                                                                               | $1.34 \times 10^{-11} \times \exp(410/T)$   | <sup>3</sup> , IUPAC  | X |
| BPIN + OH         | → TERPO2                                                                                                                                                               | $1.62 \times 10^{-11} \times \exp(460/T)$   | <sup>3</sup> , IUPAC  | X |
| LIMONENE + OH     | → TERPO2                                                                                                                                                               | $3.41 \times 10^{-11} \times \exp(470/T)$   | <sup>3</sup> , IUPAC  | X |
| MYRC + OH         | → TERPO2                                                                                                                                                               | $2.1 \times 10^{-10}$                       | <sup>3</sup>          |   |
| BCARY + OH        | → BCO2                                                                                                                                                                 | $2.0 \times 10^{-10}$                       | <sup>11</sup> , IUPAC | X |
| APIN + O3         | → 0.07 ELVOC + 0.39 TERPROD1 + 0.27 TERPROD2 + 0.63 OH + 0.57 HO2 + 0.23 CO + 0.52 CH3COCH3 + 0.34 HCHO + 0.05 HCOOH + 0.05 BIGALK + 0.06 CH3C(O)O2 + 0.06 CC(=O)CO[O] | $8.22 \times 10^{-16} \times \exp(-640/T)$  | <sup>3</sup> , IUPAC  | X |
| BPIN + O3         | → 0.43 TERPROD1 + 0.3 TERPROD2 + 0.63 OH + 0.57 HO2 + 0.23 CO + 0.52 CH3COCH3 + 0.34 HCHO + 0.05 HCOOH + 0.05 BIGALK + 0.06 CH3C(O)O2 + 0.06 CC(=O)CO[O]               | $1.39 \times 10^{-15} \times \exp(-1280/T)$ | <sup>3</sup> , IUPAC  | X |
| LIMONENE + O3     | → 0.07 ELVOC + 0.39 TERPROD1 + 0.27 TERPROD2 + 0.63 OH + 0.57 HO2 + 0.23 CO + 0.52 CH3COCH3 + 0.34 HCHO + 0.05 HCOOH + 0.05 BIGALK + 0.06 CH3C(O)O2 + 0.06 CC(=O)CO[O] | $2.91 \times 10^{-15} \times \exp(-770/T)$  | <sup>3</sup> , IUPAC  | X |
| MYRC + O3         | → 0.43 TERPROD1 + 0.3 TERPROD2 + 0.63 OH + 0.57 HO2 + 0.23 CO + 0.52 CH3COCH3 + 0.34 HCHO + 0.05 HCOOH + 0.05 BIGALK + 0.06 CH3C(O)O2 + 0.06 CC(=O)CO[O]               | $2.69 \times 10^{-15} \times \exp(-520/T)$  | <sup>3</sup> , IUPAC  | X |
| BCARY + O3        | → 0.9 BCOO + 0.1 BCO2 + 0.1 OH                                                                                                                                         | $1.2 \times 10^{-14}$                       | <sup>11</sup> , IUPAC | X |
| APIN + NO3        | → NTERPO2                                                                                                                                                              | $1.2 \times 10^{-12} \times \exp(490/T)$    | <sup>3</sup> , IUPAC  |   |
| BPIN + NO3        | → NTERPO2                                                                                                                                                              | $2.5 \times 10^{-12}$                       | <sup>3</sup> , IUPAC  |   |
| LIMONENE + NO3    | → NTERPO2                                                                                                                                                              | $1.2 \times 10^{-11}$                       | <sup>3</sup> , IUPAC  |   |
| MYRC + NO3        | → NTERPO2                                                                                                                                                              | $1.1 \times 10^{-11}$                       | <sup>3</sup> , IUPAC  | X |
| BCARY + NO3       | → NTERPO2 + 0.5 TERPROD1                                                                                                                                               | $1.9 \times 10^{-11}$                       | <sup>3</sup> , IUPAC  | X |
| TERPO2 + NO       | → 0.26 TERPNO3 + 0.36 HCHO + 0.045 CH3COCH3 + 0.695 TERPROD1 + 0.74 HO2 + 0.74 NO2                                                                                     | $4.2 \times 10^{-12} \times \exp(180/T)$    | <sup>3</sup>          |   |

|                     |   |                                                                                                        |                                          |    |                              |
|---------------------|---|--------------------------------------------------------------------------------------------------------|------------------------------------------|----|------------------------------|
| TERPO2 + HO2        | → | TERPOOH                                                                                                | $7.5 \times 10^{-13} \times \exp(700/T)$ | 3  |                              |
| TERPO2 + CH3O2      | → | 1.15 HCHO + 0.05 CH3COCH3 + 0.945 TERPROD1 + HO2 + 0.25 CH3OH                                          | $2.0 \times 10^{-12} \times \exp(500/T)$ | 3  |                              |
| TERPO2 + CH3C(O)O2  | → | 0.4 HCHO + 0.05 CH3COCH3 + 0.945 TERPROD1 + HO2 + CH3O2                                                | $1.0 \times 10^{-11}$                    | 3  |                              |
| TERPOOH + OH        | → | TERPO2                                                                                                 | $3.3 \times 10^{-11}$                    | 3  |                              |
| TERPROD1 + OH       | → | TERP2O2                                                                                                | $5.7 \times 10^{-11}$                    | 3  |                              |
| TERPROD1 + NO3      | → | 0.5 TERP2O2 + 0.5 NTERPO2 + 0.5 NO2                                                                    | $1.0 \times 10^{-12}$                    | 3  |                              |
| TERP2O2 + HO2       | → | TERP2OOH                                                                                               | $7.5 \times 10^{-13} \times \exp(700/T)$ | 3  |                              |
| TERP2O2 + NO        | → | 0.1 TERPNO3 + 0.34 HCHO + 0.27 CH3COCH3 + 0.225 CO + 0.9 TERPROD2 + 0.9 HO2 + 0.9 NO2 + 0.225 OHCCH2OH | $4.2 \times 10^{-12} \times \exp(180/T)$ | 3  |                              |
| TERP2O2 + CH3O2     | → | TERPROD2 + 0.93 HCHO + 0.25 CH3OH + HO2 + 0.125 CO + 0.125 OHCCH2OH + 0.15 CH3COCH3                    | $2.0 \times 10^{-12} \times \exp(500/T)$ | 3  |                              |
| TERP2O2 + CH3C(O)O2 | → | 0.34 HCHO + 0.27 CH3COCH3 + 0.225 CO + TERPROD2 + HO2 + 0.225 OHCCH2OH + CH3O2                         | $1.0 \times 10^{-11}$                    | 3  |                              |
| TERPNO3 + OH        | → | NO2 + TERPROD1                                                                                         | $3.5 \times 10^{-12}$                    | 3  |                              |
| TERP2OOH + OH       | → | TERP2O2                                                                                                | $2.3 \times 10^{-11}$                    | 3  |                              |
| TERPROD2 + OH       | → | 0.15 CC(=O)CO[O] + 0.68 HCHO + 0.5 CH3COCH3 + 0.65 CH3C(O)O2 + 0.2 HO2 + 0.7 CO                        | $3.4 \times 10^{-11}$                    | 3  |                              |
| NTERPO2 + NO        | → | 0.26 NTERPNO3 + 0.74 TERPROD1 + 1.48 NO2                                                               | $4.2 \times 10^{-12} \times \exp(180/T)$ | 3  |                              |
| NTERPO2 + NO3       | → | TERPROD1 + NO2 + NO2                                                                                   | $2.4 \times 10^{-12}$                    | 3  |                              |
| NTERPO2 + HO2       | → | NTERPOOH                                                                                               | $7.5 \times 10^{-13} \times \exp(700/T)$ | 3  | Analog to TERPO2 and TERP2O2 |
| NTERPO2 + CH3O2     | → | 0.5 NTERPNO3 + 0.75 HCHO + 0.25 CH3OH + 0.5 HO2 + 0.5 TERPROD1 + 0.5 NO2                               | $2.0 \times 10^{-12} \times \exp(500/T)$ | 3  |                              |
| NTERPO2 + CH3C(O)O2 | → | TERPROD1 + NO2 + CH3O2                                                                                 | $1.0 \times 10^{-11}$                    | 3  |                              |
| NTERPNO3 + OH       | → | NO2 + TERPROD1                                                                                         | $3.5 \times 10^{-12}$                    | 3  |                              |
| NTERPOOH + OH       | → | NTERPO2                                                                                                | $2.0 \times 10^{-11}$                    | 3  | MCM                          |
| ELVOC + OH          | → | HO2 + TERPROD1                                                                                         | $1.0 \times 10^{-11}$                    | 3  |                              |
| BCOO                | → | PROD1                                                                                                  | 100                                      | 11 |                              |

X

X

X

|                  |                      |                                                                |                                            |                               |   |
|------------------|----------------------|----------------------------------------------------------------|--------------------------------------------|-------------------------------|---|
| BCOO             | $\xrightarrow{H_2O}$ | 0.5 PROD1 + 0.5 H2O2 + 0.5 PROD2                               | $2.0 \times 10^{-16}$                      | <sup>11</sup>                 | X |
| BCO2 + NO        | →                    | 0.753 PROD1 + 0.753 HO2 + 0.753 NO2 + 0.247 BCNO3              | $2.54 \times 10^{-12} \times \exp(360/T)$  | <sup>11</sup>                 | X |
| BCO2 + NO3       | →                    | NO2 + HO2 + PROD1                                              | $2.3 \times 10^{-12}$                      | <sup>11</sup> , MCM           | X |
| BCO2 + HO2       | →                    | BCOOH                                                          | $2.84 \times 10^{-13} \times \exp(1300/T)$ | <sup>11</sup>                 | X |
| BCO2 + CH3O2     | →                    | PROD1 + 2 HO2 + HCHO                                           | $1.0 \times 10^{-12}$                      | <sup>11</sup> , RO2 chemistry | X |
| BCO2 + CH3C(O)O2 | →                    | PROD1 + HO2 + CH3O2                                            | $1.0 \times 10^{-11}$                      | <sup>11</sup> , RO2 chemistry | X |
| BCNO3 + OH       | →                    | PROD1 + NO2                                                    | $7.3 \times 10^{-11}$                      | <sup>11</sup>                 | X |
| BCOOH + OH       | →                    | PROD1 + OH                                                     | $9.1 \times 10^{-11}$                      | <sup>11</sup>                 | X |
| PROD1 + O3       | →                    | 0.836 PROD3 + 0.836 HCHO + 0.164 P1O2 + 0.164 OH               | $1.1 \times 10^{-16}$                      | <sup>11</sup>                 | X |
| PROD1 + OH       | →                    | P1O2                                                           | $7.9 \times 10^{-11}$                      | <sup>11</sup>                 | X |
| P1O2 + NO        | →                    | 0.753 PROD3 + 0.753 HCHO + 0.753 HO2 + 0.753 NO2 + 0.247 P1NO3 | $2.54 \times 10^{-12} \times \exp(360/T)$  | <sup>11</sup>                 | X |
| P1O2 + NO3       | →                    | PROD3 + HCHO + HO2 + NO2                                       | $2.3 \times 10^{-12}$                      | <sup>11</sup> , MCM           | X |
| P1O2 + HO2       | →                    | PSQTOOH                                                        | $2.84 \times 10^{-13} \times \exp(1300/T)$ | <sup>11</sup>                 | X |
| P1O2 + CH3O2     | →                    | PROD3 + 2 HCHO + 2 HO2                                         | $1.0 \times 10^{-12}$                      | <sup>11</sup> , RO2 chemistry | X |
| P1O2 + CH3C(O)O2 | →                    | PROD3 + HCHO + HO2 + CH3O2                                     | $1.0 \times 10^{-11}$                      | <sup>11</sup> , RO2 chemistry | X |
| P1NO3 + OH       | →                    | PROD3 + HCHO + NO2                                             | $2.3 \times 10^{-11}$                      | <sup>11</sup>                 | X |
| PROD2 + O3       | →                    | 0.836 PROD4 + 0.836 HCHO + 0.164 P2O2 + 0.164 OH               | $1.1 \times 10^{-16}$                      | <sup>11</sup>                 | X |
| PROD2 + OH       | →                    | P2O2                                                           | $7.0 \times 10^{-11}$                      | <sup>11</sup>                 | X |
| P2O2 + NO        | →                    | 0.753 PROD4 + 0.753 HCHO + 0.753 HO2 + 0.753 NO2 + 0.247 P2NO3 | $2.54 \times 10^{-12} \times \exp(360/T)$  | <sup>11</sup>                 | X |
| P2O2 + NO3       | →                    | PROD4 + HCHO + HO2 + NO2                                       | $2.3 \times 10^{-12}$                      | <sup>11</sup> , MCM           | X |
| P2O2 + HO2       | →                    | PSQTOOH                                                        | $2.84 \times 10^{-13} \times \exp(1300/T)$ | <sup>11</sup>                 | X |
| P2O2 + CH3O2     | →                    | PROD4 + 2 HCHO + 2 HO2                                         | $1.0 \times 10^{-12}$                      | <sup>11</sup>                 | X |
| P2O2 + CH3C(O)O2 | →                    | PROD4 + HCHO + HO2 + CH3O2                                     | $1.0 \times 10^{-11}$                      | <sup>11</sup>                 | X |
| PROD3 + OH       | →                    | 0.9 TERP2O2 + 1.25 CO2C3CHO                                    | $3.7 \times 10^{-11}$                      | <sup>11</sup>                 | X |
| PROD4 + OH       | →                    | 0.9 TERP2O2 + 1.25 CO2C3CHO                                    | $1.2 \times 10^{-11}$                      | <sup>11</sup>                 | X |



**Table S1-3:** URMELL Photolysis reactions. Photolysis rates are calculated as in MCM3.3.1, therefore the reader is referred to [http://mcm.york.ac.uk/parameters/photolysis\\_param.htm](http://mcm.york.ac.uk/parameters/photolysis_param.htm). A few parameters were calculated from IUPAC data. A list of the photolysis parameters is given in Table S1-4. All reaction equations marked with an X or a number from 1 to 5 deviate from original JAMv2b formula.

| Photolysis reaction                                            | Photolysis rate as in MCM3.3.1 |   |
|----------------------------------------------------------------|--------------------------------|---|
| O3 → O1D                                                       | J1                             |   |
| O3 → O3PX                                                      | J2                             |   |
| H2O2 → OH + OH                                                 | J3                             |   |
| HONO → OH + NO                                                 | J7                             |   |
| NO2 → NO + O3PX                                                | J4                             |   |
| N2O5 → NO3 + NO2                                               | <sup>3</sup> , IUPAC           |   |
| HNO3 → OH + NO2                                                | J8                             |   |
| NO3 → NO                                                       | J5                             |   |
| NO3 → NO2 + O3PX                                               | J6                             |   |
| HNO4 → 0.65 HO2 + 0.65 NO2 + 0.35 OH + 0.35 NO3                | <sup>3</sup> , IUPAC           |   |
| CH3OOH → HCHO + HO2 + OH                                       | J41                            |   |
| HCHO → CO + HO2 + HO2                                          | J11                            |   |
| HCHO → H2 + CO                                                 | J12                            |   |
| HOCH2OOH → HCOOH + HO2 + OH                                    | IUPAC                          |   |
| EOOH → EO + OH                                                 | J41                            |   |
| CCOO → CH3CHO + OH + HO2                                       | J41                            |   |
| CH3CHO → CH3O2 + HO2 + CO                                      | J13                            |   |
| CH3COOOH → CH3O2 + OH                                          | J41                            | 3 |
| PAN → 0.6 CH3C(O)O2 + 0.6 NO2 + 0.4 CH3O2 + 0.4 NO3            | <sup>3</sup> , IUPAC           |   |
| OHCCH2OH → HO2 + HCHO + HO2 + CO                               | J15                            |   |
| OCC(=O)OO → HCHO + HO2 + OH                                    | J41                            |   |
| GLY → 0.87 CO + 0.87 CO + 0.87 H2 + 0.13 HCHO + 0.13 CO        | J31+J32                        | 4 |
| GLY → CO + CO + HO2 + HO2                                      | J33                            |   |
| O=C(OO)C=O → HO2 + CO + OH                                     | J15                            |   |
| HOOCCHO → HO2 + HO2 + CO                                       | J34                            | 3 |
| CH3CH(OH)OOH → HCOOH + CH3O2 + OH                              | Analog to HOCH2OOH             |   |
| POOH → CH3CHO + HCHO + HO2 + OH                                | J41                            |   |
| PROPOOH → 0.736 CH3COCH3 + 0.396 CH3CHO + OH + HO2             | J41                            |   |
| CH3COCH3 → CH3C(O)O2 + CH3O2                                   | J21                            |   |
| CC(=O)COO → CH3C(O)O2 + HCHO + OH                              | J22                            |   |
| CC(=O)COO → CH3C(O)O2 + HCHO + OH                              | J41                            |   |
| CH3COCOHOH → CH3C(O)O2 + HO2                                   | J34                            |   |
| MGLY → CH3C(O)O2 + CO + HO2                                    | J34                            | 3 |
| CH3COCH2OH → CH3C(O)O2 + HCHO + HO2                            | J22                            |   |
| PR2O2HNO3 → 0.83 HO2 + 0.83 NOA + 0.17 HCHO + 0.17 CH3CHO + OH | J41                            |   |

|                                    |   |                                                                                                                                                |         |   |
|------------------------------------|---|------------------------------------------------------------------------------------------------------------------------------------------------|---------|---|
| NOA                                | → | CH <sub>3</sub> C(O)O <sub>2</sub> + HCHO + NO <sub>2</sub>                                                                                    | J56     | 3 |
| MEK                                | → | CH <sub>3</sub> C(O)O <sub>2</sub> + ETHPX                                                                                                     | J22     | 3 |
| MEKANO <sub>3</sub>                | → | NO <sub>2</sub> + 0.5 CO <sub>2</sub> C <sub>3</sub> CHO + 0.5 HCHO + 0.5 EO <sub>2</sub> + 0.5 HO <sub>2</sub>                                | J22     | 3 |
| MEKANO <sub>3</sub>                | → | NO <sub>2</sub> + 0.5 CO <sub>2</sub> C <sub>3</sub> CHO + 0.5 HCHO + 0.5 EO <sub>2</sub> + 0.5 HO <sub>2</sub>                                | J53     | 3 |
| MEKAOOH                            | → | 0.5 HCHO + 0.5 HO <sub>2</sub> + 0.5 CO <sub>2</sub> C <sub>3</sub> CHO + 0.5 EO <sub>2</sub> + OH                                             | J41     | 3 |
| MEKAOOH                            | → | 0.5 HCHO + 0.5 HO <sub>2</sub> + 0.5 CO <sub>2</sub> C <sub>3</sub> CHO + 0.5 EO <sub>2</sub> + OH                                             | J22     | 3 |
| MEKBOOH                            | → | CH <sub>3</sub> C(O)O <sub>2</sub> + CH <sub>3</sub> CHO + OH                                                                                  | J41     | 3 |
| MEKBOOH                            | → | CH <sub>3</sub> C(O)O <sub>2</sub> + CH <sub>3</sub> CHO + OH                                                                                  | J22     | 3 |
| MEKCOOH                            | → | HCHO + 1.5 CH <sub>3</sub> C(O)O <sub>2</sub> + OH                                                                                             | J41     | 3 |
| MEKCOOH                            | → | HCHO + 1.5 CH <sub>3</sub> C(O)O <sub>2</sub> + OH                                                                                             | J22     | 3 |
| MEKAOH                             | → | CH <sub>3</sub> C(O)O <sub>2</sub> + EO                                                                                                        | J22     | X |
| MEKBOH                             | → | CH <sub>3</sub> C(O)O <sub>2</sub> + CH <sub>3</sub> CHO                                                                                       | J22     | X |
| MEKCOH                             | → | 1.5 CH <sub>3</sub> C(O)O <sub>2</sub> + HCHO + HO <sub>2</sub>                                                                                | J22     | X |
| CO <sub>2</sub> C <sub>3</sub> CHO | → | CC(=O)CO[O] + HCHO                                                                                                                             | J15     |   |
| MACR                               | → | HO <sub>2</sub> + 0.5 MCO <sub>3</sub> + 0.5 HCHO + 0.175 CH <sub>3</sub> C(O)O <sub>2</sub> + 0.825 CO + 0.325 CH <sub>3</sub> O <sub>2</sub> | J18+J19 | 5 |
| MACRN                              | → | NOA + HO <sub>2</sub> + CO + OH                                                                                                                | J22     | 5 |
| MACRN                              | → | NOA + HO <sub>2</sub> + CO + OH                                                                                                                | J41     | 5 |
| MACR2N3OH                          | → | CH <sub>3</sub> COCH <sub>2</sub> OH + HO <sub>2</sub> + CO + NO <sub>2</sub>                                                                  | J56     |   |
| MACR2NOOH                          | → | CH <sub>3</sub> COCH <sub>2</sub> OH + OH + NO <sub>2</sub>                                                                                    | J22     |   |
| MACR2NOOH                          | → | CH <sub>3</sub> COCH <sub>2</sub> OH + OH + NO <sub>2</sub>                                                                                    | J41     |   |
| MACR2NOOH                          | → | CH <sub>3</sub> COCH <sub>2</sub> OH + OH + NO <sub>2</sub>                                                                                    | J51     |   |
| MACROOH                            | → | CH <sub>3</sub> COCH <sub>2</sub> OH + CO + HO <sub>2</sub> + OH                                                                               | J17     | 3 |
| MACROH                             | → | CH <sub>3</sub> COCH <sub>2</sub> OH + CO + HO <sub>2</sub> + HO <sub>2</sub>                                                                  | J17     | 3 |
| MACO <sub>3</sub> H                | → | HCHO + 0.35 CH <sub>3</sub> C(O)O <sub>2</sub> + OH + 0.65 CH <sub>3</sub> O <sub>2</sub> + 0.65 CO                                            | J41     | 5 |
| MVK                                | → | 0.50 C <sub>3</sub> H <sub>6</sub> + CO + 0.50 CH <sub>3</sub> C(O)O <sub>2</sub> + 0.50 HCHO + 0.50 HO <sub>2</sub>                           | J23+J24 |   |
| MVKOH                              | → | CH <sub>3</sub> C(O)O <sub>2</sub> + OHCCH <sub>2</sub> OH + HO <sub>2</sub>                                                                   | J22     |   |
| MVKN                               | → | 1.01 CH <sub>3</sub> C(O)O <sub>2</sub> + 0.69 OHCCH <sub>2</sub> OH + 0.7 NO <sub>2</sub> + 0.3 ETHLN + 0.29 HO <sub>2</sub> + 0.01 OH        | 1.6×J56 | 3 |
| LHMVKABOOH                         | → | OH + 0.47 HCHO + 0.47 MGLY + 0.47 HO <sub>2</sub> + 0.53 CH <sub>3</sub> C(O)O <sub>2</sub> + 0.53 OHCCH <sub>2</sub> OH                       | J17     | 5 |
| CO <sub>2</sub> H <sub>3</sub> CHO | → | 0.5 MGLY + 0.5 CO + 1.5 HO <sub>2</sub> + 0.5 CH <sub>3</sub> C(O)O <sub>2</sub> + 0.5 GLY                                                     | J35     | 3 |
| BIACETOH                           | → | CH <sub>3</sub> C(O)O <sub>2</sub> + CO + HO <sub>2</sub> + HCHO                                                                               | J35     | 3 |
| MALOOH                             | → | 0.4 GLY + HO <sub>2</sub> + 0.4 CO + 0.6 MALANHY + OH                                                                                          | 2×J20   |   |
| MDIALOOH                           | → | 0.5 CH <sub>3</sub> C(O)O <sub>2</sub> + 0.5 GLY + 0.5 CO + 0.5 HO <sub>2</sub> + 0.5 MGLY + OH                                                | 2×J20   |   |
| MALANHYOOH                         | → | OH + HCOCOHCO <sub>3</sub>                                                                                                                     | J41     |   |
| HCOCOHCO <sub>3</sub> H            | → | OH + GLY + HO <sub>2</sub>                                                                                                                     | J41     |   |
| IBUTALOH                           | → | CH <sub>3</sub> COCH <sub>3</sub> + HO <sub>2</sub> + HO <sub>2</sub> + CO                                                                     | J17     | 3 |
| IBUTALOOH                          | → | HO <sub>2</sub> + CH <sub>3</sub> COCH <sub>3</sub> + OH                                                                                       | J41     | 3 |
| ALKNO <sub>3</sub>                 | → | 0.4 CH <sub>3</sub> CHO + 0.25 HCHO + 0.25 CH <sub>3</sub> COCH <sub>3</sub> + HO <sub>2</sub> + 0.8 MEK + NO <sub>2</sub>                     | J54     | 3 |
| ALKOOH                             | → | 0.4 CH <sub>3</sub> CHO + 0.25 HCHO + 0.25 CH <sub>3</sub> COCH <sub>3</sub> + HO <sub>2</sub> + 0.8 MEK + OH                                  | J41     |   |
| LISOPACNO <sub>3</sub>             | → | 0.45 LHC <sub>4</sub> ACCHO + 0.45 HO <sub>2</sub> + 0.55 CO + 0.55 OH + 0.33 MACROOH + 0.22 LHMVKABOOH + NO <sub>2</sub>                      | J53     | 3 |

|            |   |                                                                                                                                     |         |   |
|------------|---|-------------------------------------------------------------------------------------------------------------------------------------|---------|---|
| LISOPACOOH | → | 0.97 LHC4ACCHO + 0.97 HO2 + 1.03 OH + 0.03 CO + 0.012 MACROOH + 0.018 LHMVKABOOH                                                    | J41     |   |
| DHPMPAL    | → | CO + HO2 + OH + CC(=O)COO                                                                                                           | J15     |   |
| DHPMPAL    | → | 0.5 MGLY + 1.5 OH + 0.5 HCHO + 0.5 C3MDIALOOH                                                                                       | J41     |   |
| DHPMEK     | → | 0.5 CH3C(O)O2 + 0.5 HCHO + 0.5 MGLY + 0.5 HCOCH2OOH + 1.5 OH                                                                        | J41     |   |
| DHPMEK     | → | CH3C(O)O2 + HCOCH2OOH + OH                                                                                                          | J22     |   |
| HCOCH2OOH  | → | OH + HCHO + CO + HO2                                                                                                                | J41     |   |
| HCOCH2OOH  | → | HO2 + CO + HCHO + OH                                                                                                                | J22     |   |
| C3MDIALOOH | → | MGLY + OH + HO2 + CO                                                                                                                | 2×J17   |   |
| HPALD      | → | 0.285 CH3C(O)O2 + 0.285 HVMK + 0.285 OHCCH2OH + 1.215 CO + 1.5 OH + 0.215 MACRENOL + 0.215 CH3COCH2OH + 0.215 HO2                   | 0.5×J20 |   |
| LIECHO     | → | HO2 + 0.28 OH + 1.28 CO + 0.72 LHMVKABO2 + 0.28 CH3COCH2OH                                                                          | J17     |   |
| LIECO3H    | → | 0.546 OH + CO + 1.454 HO2 + 0.391 CO2H3CHO + 0.155 C3MDIALOH + 0.454 LHMVKABOOH                                                     | J41     |   |
| LIECO3H    | → | 0.546 OH + CO + 1.454 HO2 + 0.391 CO2H3CHO + 0.155 C3MDIALOH + 0.454 LHMVKABOOH                                                     | 2×J22   |   |
| ISOPBNO3   | → | HCHO + MVK + HO2 + NO2                                                                                                              | J55     | 3 |
| ISOPBOOH   | → | HCHO + MVK + HO2 + OH                                                                                                               | J41     |   |
| DHHPEPOX   | → | OH + HO2 + 0.429 MGLY + 0.429 OHCCH2OH + 0.571 GLY + 0.571 CC(=O)COO                                                                | J41     |   |
| ISOPDNO3   | → | HCHO + MACR + HO2 + NO2                                                                                                             | J54     | 3 |
| ISOPDOOH   | → | HCHO + MACR + HO2 + OH                                                                                                              | J41     |   |
| NISOPBOOH  | → | NO2 + 0.33 HO2 + 0.67 OH + 0.097 MACR + 0.903 MVK + HCHO                                                                            | J41     |   |
| NISOPDOOH  | → | 0.125 NC4CHO + 0.125 HO2 + 0.783 OH + 0.217 NO2 + 0.182 ISOPBO2 + 0.034 ISOPDO2 + 0.659 NISOPO                                      | J41     |   |
| NISOPOOH=O | → | 0.5 CO + 0.25 LHMVKABOOH + 0.25 MACROOH + 0.5 HO2 + 0.5 OH + NO2 + 0.5 MGLY + 0.5 OHCCH2OH                                          | J41     |   |
| NISOPOOH=O | → | OH + NO2 + MGLY + OHCCH2OH                                                                                                          | J54     |   |
| NISOPOOH=O | → | CO + 0.5 LHMVKABOOH + 0.5 MACROOH + HO2 + NO2                                                                                       | J22     |   |
| NISOPOOHOH | → | NO2 + IDHPOO1                                                                                                                       | J54     |   |
| NISOPOOHOH | → | OH + 0.5 IDHNBOO + 0.5 LISOPACNO3O2                                                                                                 | 2×J41   |   |
| NISOPOH    | → | NO2 + 0.5 MVK + 0.5 MACR + HO2 + HCHO                                                                                               | J53     |   |
| NISOPN     | → | 1.11 NO2 + 0.455 NC4CHO + 0.455 HO2 + 0.1 MVK + 0.01 MACR + 0.11 HCHO + 0.455 NISOPO                                                | J55     |   |
| MACRNOOH   | → | NOA + OH + CO + HO2                                                                                                                 | J17     |   |
| LHMVKNOOH  | → | CH3C(O)O2 + OH + ETHLN                                                                                                              |         |   |
| LHMVKNOOH  | → | CH3C(O)O2 + OH + ETHLN                                                                                                              | J53+J22 |   |
| IHNEOOH    | → | HO2 + OH + NOA + GLY                                                                                                                | J41     |   |
| NISOPNOOH  | → | OH + 0.32 NO2 + 0.32 OHCCH2OH + 0.5 ETHLN + 0.82 NOA + 0.68 HO2 + 0.18 LISOPNO3NO3=O                                                | J41     |   |
| NISOPNOOH  | → | 0.535 OH + NO2 + 0.16 OHCCH2OH + 0.25 NOA + 0.09 HO2 + 0.25 LISOPACNO3O2 + 0.125 IDHNBOO + 0.375 MVKN + 0.375 HCHO + 0.09 HCOCH2OOH | 2×J51   |   |
| ETHLN      | → | HCHO + CO + HO2 + NO2                                                                                                               | J56     |   |
| NO3CH2CO3H | → | HCHO + OH + NO2                                                                                                                     | J41     |   |
| HVMK       | → | 0.5 CO + 0.5 MGLY + OH + 0.5 HO2 + 0.5 CH3C(O)O2 + 0.5 GLY                                                                          | 0.5×J20 |   |

|                                         |   |                                                                                                                                                                                                                                                                                                                                                  |         |   |
|-----------------------------------------|---|--------------------------------------------------------------------------------------------------------------------------------------------------------------------------------------------------------------------------------------------------------------------------------------------------------------------------------------------------|---------|---|
| MACRENOL                                | → | CO + CH <sub>3</sub> COCOOH + 2 OH                                                                                                                                                                                                                                                                                                               | 0.5×J20 |   |
| C3MDIALOH                               | → | CO + MGLY + 2 HO <sub>2</sub>                                                                                                                                                                                                                                                                                                                    | 2×J17   |   |
| NC4CHO                                  | → | NO <sub>2</sub> + 0.184 HO <sub>2</sub> + 0.088 HCHO + 0.104 CH <sub>3</sub> C(O)O <sub>2</sub> + 0.056 MGLY + 1.004 CO + 0.016 GLY + 0.552 OH + 0.08 MDIALOOH + 0.08 C3MDIALOOH + 0.144 HVMK + 0.336 MACRENOL + 0.06 LHMVKABO <sub>2</sub> + 0.14 CH <sub>3</sub> COCH <sub>3</sub>                                                             | 8×J56   | 3 |
| LHC4ACCHO                               | → | 0.5 LHC4ACCO <sub>3</sub> + 0.3 CH <sub>3</sub> COCH <sub>2</sub> OH + 0.2 OHCCH <sub>2</sub> OH + 0.2 CH <sub>3</sub> C(O)O <sub>2</sub> + 1.3 HO <sub>2</sub> + 0.8 CO                                                                                                                                                                         | J18+J19 | 3 |
| LC578OOH                                | → | CO + 1.5 HO <sub>2</sub> + 0.5 OH + 0.5 MACROOH + 0.35 MVKOH + 0.15 MACROH                                                                                                                                                                                                                                                                       | J22     |   |
| LC578OOH                                | → | OH + HO <sub>2</sub> + 0.1 HCHO + 0.1 CO <sub>2</sub> H <sub>3</sub> CHO + 0.438 CH <sub>3</sub> COCH <sub>2</sub> OH + 0.438 GLY + 0.088 OHCCH <sub>2</sub> OH + 0.088 MGLY + 0.122 CO + 0.122 MACROH                                                                                                                                           | J41     |   |
| LHC4ACCO <sub>3</sub> H                 | → | 0.5 CH <sub>3</sub> COCH <sub>2</sub> OH + 0.5 OHCCH <sub>2</sub> OH + 0.5 CH <sub>3</sub> C(O)O <sub>2</sub> + 0.5 CO + 0.5 HO <sub>2</sub> + OH                                                                                                                                                                                                | J41     | 3 |
| HCOC <sub>5</sub>                       | → | OCC(=O)O[O] + CH <sub>3</sub> C(O)O <sub>2</sub> + HCHO                                                                                                                                                                                                                                                                                          | J24     | 3 |
| MBOOOH                                  | → | HO <sub>2</sub> + 0.67 OHCCH <sub>2</sub> OH + 0.67 CH <sub>3</sub> COCH <sub>3</sub> + 0.33 IBUTALOH + 0.33 HCHO + OH                                                                                                                                                                                                                           | J41     |   |
| MBONO <sub>3</sub> OOH                  | → | 0.35 HCHO + 0.35 IBUTALOH + 0.35 NO <sub>2</sub> + 0.43 NOA + 0.65 CH <sub>3</sub> COCH <sub>3</sub> + 0.65 HO <sub>2</sub> + OH                                                                                                                                                                                                                 | J41     |   |
| BIGACID <sub>2</sub>                    | → | CH <sub>3</sub> C(O)O <sub>2</sub> + HOOCCHO + CO + HO <sub>2</sub>                                                                                                                                                                                                                                                                              | J23+J24 |   |
| DICARBOOH                               | → | 0.17 MGLY + 0.17 HO <sub>2</sub> + 0.17 CO + 0.83 MALANHY + 0.83 CH <sub>3</sub> O <sub>2</sub> + OH                                                                                                                                                                                                                                             | 2×J20   |   |
| LISOPNO <sub>3</sub> OOH                | → | 0.65 OH + 0.7 HO <sub>2</sub> + 0.35 HCHO + 0.025 MVKN + 0.075 ETHLN + 0.25 MACRN + 0.325 OHCCH <sub>2</sub> OH + 0.625 CH <sub>3</sub> COCH <sub>2</sub> OH + 0.65 NO <sub>2</sub> + 0.075 MACROOH + 0.25 HCOCH <sub>2</sub> OOH + 0.025 CC(=O)COO                                                                                              | J41     |   |
| LISOPNO <sub>3</sub> OOH                | → | 0.65 OH + 0.7 HO <sub>2</sub> + 0.35 HCHO + 0.025 MVKN + 0.075 ETHLN + 0.25 MACRN + 0.325 OHCCH <sub>2</sub> OH + 0.625 CH <sub>3</sub> COCH <sub>2</sub> OH + 0.65 NO <sub>2</sub> + 0.075 MACROOH + 0.25 HCOCH <sub>2</sub> OOH + 0.025 CC(=O)COO                                                                                              | J51     |   |
| LISOPOOHOH                              | → | 1.25 OH + 0.25 OHCCH <sub>2</sub> OH + 0.25 CH <sub>3</sub> COCH <sub>2</sub> OH + 0.75 LC578OOH + 0.75 HO <sub>2</sub>                                                                                                                                                                                                                          | 2×J41   |   |
| LISOPNO <sub>3</sub> NO <sub>3</sub>    | → | CC(=O)COO + OHCCH <sub>2</sub> OH + 2 NO <sub>2</sub>                                                                                                                                                                                                                                                                                            | J55     |   |
| LISOPNO <sub>3</sub> NO <sub>3</sub> =O | → | 0.6 CC(=O)COO + NO <sub>2</sub> + 0.6 NO <sub>3</sub> CH <sub>2</sub> CO <sub>3</sub> + 0.4 HO <sub>2</sub> + 0.4 CO + 0.2 MACRN + 0.2 MVKN                                                                                                                                                                                                      | J41     |   |
| LISOPNO <sub>3</sub> NO <sub>3</sub> =O | → | 0.6 CC(=O)COO + NO <sub>2</sub> + 0.6 NO <sub>3</sub> CH <sub>2</sub> CO <sub>3</sub> + 0.4 HO <sub>2</sub> + 0.4 CO + 0.2 MACRN + 0.2 MVKN                                                                                                                                                                                                      | J22     |   |
| LISOPNO <sub>3</sub> NO <sub>3</sub> =O | → | 1.5 NO <sub>2</sub> + 0.65 CO + 0.1 MACROH + 0.1 MVKOH + 0.075 MVKN + 0.075 MACRN + 0.275 HO <sub>2</sub> + 0.025 GLY + 0.025 NOA + 0.025 MGLY + 0.025 ETHLN + 0.525 CH <sub>3</sub> COCH <sub>2</sub> OH + 0.375 HCHO + 0.075 NO <sub>2</sub> + 0.15 CH <sub>3</sub> C(O)O <sub>2</sub> + 0.225 NO <sub>3</sub> CH <sub>2</sub> CO <sub>3</sub> | 2×J51   |   |
| NISOPOHOH=O                             | → | 0.5 HO <sub>2</sub> + NO <sub>2</sub> + 0.5 CO + 0.375 MVKOH + 0.125 MACROH + 0.5 OCC(=O)O[O] + 0.5 CC(=O)COO                                                                                                                                                                                                                                    | J41     |   |
| NISOPOHOH=O                             | → | 0.5 HO <sub>2</sub> + NO <sub>2</sub> + 0.5 CO + 0.375 MVKOH + 0.125 MACROH + 0.5 OCC(=O)O[O] + 0.5 CC(=O)COO                                                                                                                                                                                                                                    | J22     |   |
| NISOPOHOH=O                             | → | NO <sub>2</sub> + 0.5 HO <sub>2</sub> + 0.375 OHCCH <sub>2</sub> OH + 0.375 MGLY + 0.125 GLY + 0.625 CC(=O)COO + 0.5 OCC(=O)O[O]                                                                                                                                                                                                                 | J51     |   |
| BEPOMUC                                 | → | 0.5 BIGALD <sub>1</sub> + 1.5 HO <sub>2</sub> + 1.5 CO + 0.5 C5DIALO <sub>2</sub>                                                                                                                                                                                                                                                                | 0.1×J4  | 3 |
| C5DIALOOH                               | → | OH + BIGALD <sub>1</sub> + CO + HO <sub>2</sub>                                                                                                                                                                                                                                                                                                  | J41     |   |
| C5DIALOOH                               | → | CO + OH + HO <sub>2</sub> + BIGALD <sub>1</sub>                                                                                                                                                                                                                                                                                                  | J18+J19 |   |
| BIGALD <sub>1</sub>                     | → | 0.6 MALO <sub>2</sub> + 0.6 HO <sub>2</sub> + 0.4 BZFUONE                                                                                                                                                                                                                                                                                        | 0.14×J4 | 3 |
| BIGALD <sub>2</sub>                     | → | 0.6 DICARBO <sub>2</sub> + 0.6 HO <sub>2</sub> + 0.4 FUONE                                                                                                                                                                                                                                                                                       | 0.2×J4  |   |
| BIGALD <sub>3</sub>                     | → | 0.6 CO + 0.6 HO <sub>2</sub> + 0.6 MDIALO <sub>2</sub> + 0.4 FUONE                                                                                                                                                                                                                                                                               | 0.2×J4  |   |

|            |   |                                                                                                                                                               |            |   |
|------------|---|---------------------------------------------------------------------------------------------------------------------------------------------------------------|------------|---|
| BIGALD4    | → | CH3C(O)O2 + MGLY + HO2 + CO                                                                                                                                   | 0.0057×J4  | 3 |
| PHENOOH    | → | 0.71 BIGACID1 + 0.71 GLY + HO2 + OH + 0.29 BZQONE                                                                                                             | J41        |   |
| NPHENOLOOH | → | BIGACID1 + GLY + NO2 + OH                                                                                                                                     | J41        |   |
| NBZQOOH    | → | OH + NO2 + 2 HO2 + 6 CO                                                                                                                                       | J41        |   |
| C6CO4DB    | → | 2 HO2 + 2 CO + C33CO                                                                                                                                          | 2×J34      |   |
| C33CO      | → | 2 HO2 + 3 CO                                                                                                                                                  | 2×J15      |   |
| BZQOOH     | → | OH + 2 HO2 + 5 CO                                                                                                                                             | J41        |   |
| HOCOC4DIAL | → | 2 HO2 + CO + GLY                                                                                                                                              | J34, J15   |   |
| CO2C4DIAL  | → | 2 HO2 + 4 CO                                                                                                                                                  | 2×J34      |   |
| BIGACID1   | → | HOOCCHO + CO + HO2 + CO + HO2                                                                                                                                 | J18+J19    |   |
| C6H5OOH    | → | C6H5O + OH                                                                                                                                                    | J41        |   |
| BENZOOH    | → | GLY + 0.5 BIGALD1 + HO2 + OH + 0.5 BZFUONE                                                                                                                    | J41        |   |
| BENZN      | → | NO2 + HO2 + GLY + 0.5 BIGALD1 + 0.5 BZFUONE                                                                                                                   | J54        |   |
| BENZ=O     | → | GLY + MALO2                                                                                                                                                   | J22        |   |
| BZFUONEOOH | → | 2 HO2 + 2 CO + OH + HCHO                                                                                                                                      | J41        |   |
| BZFUO      | → | 2 HO2 + 2 CO + HCHO                                                                                                                                           | J34        |   |
| CATEC1OOH  | → | CATEC1O + OH                                                                                                                                                  | J41        |   |
| NPHENOOH   | → | NPHENO + OH                                                                                                                                                   | J41        |   |
| TEPOMUC    | → | 0.5 CH3C(O)O2 + HO2 + CO + 0.5 EPOXDIALD + 0.5 C615CO2O2                                                                                                      | J4         | 3 |
| C615CO2OOH | → | OH + BIGALD2 + CO + HO2                                                                                                                                       | J41        |   |
| C615CO2OOH | → | CO + OH + HO2 + BIGALD2                                                                                                                                       | J19+J19    |   |
| EPOXDIALD  | → | CO + HO2 + GLY + CO + HO2                                                                                                                                     | J17*2      |   |
| CRESOOH    | → | 0.68 BIGACID2 + 0.68 GLY + HO2 + OH + 0.32 BZQONE                                                                                                             | J41        |   |
| NCRESOOH   | → | NO2 + OH + BIGACID2 + GLY                                                                                                                                     | J41        |   |
| NCRESOOH   | → | OH + NO2 + HO2 + 0.68 BIGACID2 + 0.32 BZQONE + 0.68 GLY                                                                                                       | J54        |   |
| TOLOOH     | → | 0.6 GLY + 0.4 MGLY + HO2 + 0.2 BIGALD1 + 0.2 BIGALD2 + 0.2 BIGALD3 + OH + 0.2 BZFUONE + 0.2 FUONE                                                             | J41        |   |
| TOLN       | → | NO2 + 0.6 GLY + 0.4 MGLY + HO2 + 0.2 BIGALD1 + 0.2 BIGALD2 + 0.2 BIGALD3 + 0.2 BZFUONE + 0.2 FUONE                                                            | J54        |   |
| TOL=O      | → | GLY + DICARBO2                                                                                                                                                | J22        |   |
| BZOOH      | → | BZALD + HO2 + OH                                                                                                                                              | J41        |   |
| BZALD      | → | 0.50 HO2 + 0.50 ACBZO2 + 0.50 HO2 + 0.50 CO + 0.50 C6H5O2                                                                                                     | J18+J19    |   |
| ACBZOOH    | → | C6H5O2 + OH                                                                                                                                                   | J41        |   |
| BIGACID3   | → | HOOCCHO + 2 CH3C(O)O2                                                                                                                                         | J24        |   |
| XYLENOOH   | → | 0.34 GLY + 0.57 MGLY + 0.05 BIGALD1 + 0.17 BIGALD2 + 0.16 BIGALD3 + 0.27 BIGALD4 + 0.09 CO + 0.09 HCHO + 0.09 CH3C(O)O2 + 0.3 FUONE + 0.05 BZFUONE + HO2 + OH | J41        |   |
| XYLNO3     | → | NO2 + HO2 + 0.22 GLY + 0.78 MGLY + 0.26 BIGALD2 + 0.26 BIGALD3 + 0.11 BIGALD4 + 0.37 FUONE                                                                    | J54*0.4075 |   |
| XYLNO3     | → | NO2 + HO2 + 0.42 GLY + 0.42 MGLY + 0.08 BIGALD1 + 0.113 BIGALD2 + 0.097 BIGALD3 + 0.38 BIGALD4 + 0.32 CH3C(O)O2 + 0.25 FUONE + 0.08 BZFUONE                   | J55*0.5925 |   |
| FUONEOOH   | → | HO2 + CH3C(O)O2 + HCHO + OH                                                                                                                                   | J41        |   |

|                      |   |                                                                                                                             |     |   |
|----------------------|---|-----------------------------------------------------------------------------------------------------------------------------|-----|---|
| TERPOOH              | → | 0.4 HCHO + 0.05 CH <sub>3</sub> COCH <sub>3</sub> + 0.945 TERPROD1 + HO <sub>2</sub> + OH                                   | J41 |   |
| TERPNO <sub>3</sub>  | → | TERPROD1 + NO <sub>2</sub> + HO <sub>2</sub>                                                                                | J41 |   |
| TERP2OOH             | → | OH + 0.372 HCHO + 0.3 CH <sub>3</sub> COCH <sub>3</sub> + 0.25 CO + TERPROD2 + HO <sub>2</sub> + 0.25 OHCCH <sub>2</sub> OH | J41 |   |
| NTERPOOH             | → | TERPROD1 + NO <sub>2</sub> + OH                                                                                             | J41 |   |
| NTERPNO <sub>3</sub> | → | TERPROD1 + NO <sub>2</sub> + OH                                                                                             | J41 |   |
| TERPROD1             | → | TERPROD2 + HO <sub>2</sub> + CO                                                                                             | J15 | 3 |
| TERPROD2             | → | 0.15 CC(=O)CO[O] + 0.68 HCHO + 0.5 CH <sub>3</sub> COCH <sub>3</sub> + 1.2 HO <sub>2</sub> + 1.7 CO                         | J15 | 3 |
| ELVOC                | → | OH + HO <sub>2</sub> + TERPROD2                                                                                             | J41 |   |
| BCOOH                | → | PROD1 + HO <sub>2</sub> + OH                                                                                                | J41 |   |

**Table S1-4:** List of photolysis parameters used mainly taking from the MCM3.3.1 (J1-J56). The formula used to calculate the photolysis rates is as follows:  $J = I \times \cos(\chi)^m \times \exp(-n \times \sec\chi)$  where the solar zenith angle  $\chi$  is in radians

| J                              | l                       | m     | n     |
|--------------------------------|-------------------------|-------|-------|
| J1                             | $6.073 \times 10^{-5}$  | 1.743 | 0.474 |
| J2                             | $4.775 \times 10^{-4}$  | 0.298 | 0.080 |
| J3                             | $1.041 \times 10^{-5}$  | 0.723 | 0.279 |
| J4                             | $1.165 \times 10^{-2}$  | 0.244 | 0.267 |
| J5                             | $2.485 \times 10^{-2}$  | 0.168 | 0.108 |
| J6                             | $1.747 \times 10^{-1}$  | 0.155 | 0.125 |
| J7                             | $2.644 \times 10^{-3}$  | 0.261 | 0.288 |
| J8                             | $9.312 \times 10^{-7}$  | 1.230 | 0.307 |
| J11                            | $4.642 \times 10^{-5}$  | 0.762 | 0.353 |
| J12                            | $6.853 \times 10^{-5}$  | 0.477 | 0.323 |
| J13                            | $7.344 \times 10^{-6}$  | 1.202 | 0.417 |
| J15                            | $2.792 \times 10^{-5}$  | 0.805 | 0.338 |
| J17                            | $7.914 \times 10^{-5}$  | 0.764 | 0.364 |
| J18                            | $1.482 \times 10^{-6}$  | 0.396 | 0.298 |
| J19                            | $1.482 \times 10^{-6}$  | 0.396 | 0.298 |
| J20                            | $7.600D \times 10^{-4}$ | 0.396 | 0.298 |
| J21                            | $7.992 \times 10^{-7}$  | 1.578 | 0.271 |
| J22                            | $5.804 \times 10^{-6}$  | 1.092 | 0.377 |
| J23                            | $2.4246 \times 10^{-6}$ | 0.395 | 0.296 |
| J24                            | $2.424 \times 10^{-6}$  | 0.395 | 0.296 |
| J31                            | $6.845 \times 10^{-5}$  | 0.130 | 0.201 |
| J32                            | $1.032 \times 10^{-5}$  | 0.130 | 0.201 |
| J33                            | $3.802 \times 10^{-5}$  | 0.644 | 0.312 |
| J34                            | $1.537 \times 10^{-4}$  | 0.170 | 0.208 |
| J35                            | $3.326 \times 10^{-4}$  | 0.148 | 0.215 |
| J41                            | $7.649 \times 10^{-6}$  | 0.682 | 0.279 |
| J51                            | $1.588 \times 10^{-6}$  | 1.154 | 0.318 |
| J53                            | $2.485 \times 10^{-6}$  | 1.196 | 0.328 |
| J54                            | $4.095 \times 10^{-6}$  | 1.111 | 0.316 |
| J55                            | $1.135 \times 10^{-5}$  | 0.974 | 0.309 |
| J56                            | $4.365 \times 10^{-5}$  | 1.089 | 0.323 |
| JN <sub>2</sub> O <sub>5</sub> | $7.083 \times 10^{-5}$  | 0.887 | 0.237 |
| JHNO <sub>4</sub>              | $9.036 \times 10^{-6}$  | 1.262 | 0.327 |
| JHOCH <sub>2</sub> OOH         | $8.122 \times 10^{-6}$  | 0.879 | 0.248 |
| JPAN                           | $8.518 \times 10^{-7}$  | 1.173 | 0.250 |

## Supplement S2 – Sensitivity studies

Supplement S2 contains all additional information about the box model sensitivity studies including figures, statistics and more detailed insights into the performed sensitivity studies. A summary of the main results are presented in the main manuscript in sect. 4.1 and in terms of sCI in sect. 2.2.1.

### S2.1 stabilized Criegee intermediate $\text{CH}_2\text{OO}$

The sensitivity study on the branching ratios of the stabilized Criegee intermediate  $\text{CH}_2\text{OO}$  considers ratios recommended by Nguyen *et al.* (fig. 2 dashed yellow line) and Sheps *et al.* (fig. 2 yellow line).<sup>7,14</sup> OH (fig. 2e),  $\text{HO}_2$  (fig. 2i), HCHO (fig. 2c) and  $\text{H}_2\text{O}_2$  (fig. 2m) show only minor increases with highest impacts on  $\text{H}_2\text{O}_2$  concentrations when using the ratios provided by Sheps *et al.*<sup>7</sup>. The ratios from Nguyen *et al.*<sup>12</sup> produce three times higher HCOOH (fig. 2p) ratios and an earlier production onset with minimum concentrations between 9-10 p.m. and maximum concentrations around 1pm. For Sheps *et al.*<sup>7</sup>, minimum and maximum concentrations are delayed by about eight (6 a.m.) and three hours (4 p.m.), respectively. A similar shift can be seen for JAMv2b (fig. 2 blue line) and the MCM (fig. 2 black line), but fluctuations in the diurnal cycle are weak. Compared to other chemistry mechanisms, URMELL shows a clear diurnal cycle when using the ratios from Sheps *et al.*<sup>7</sup> which is in better agreement with field measurements<sup>15,16</sup> (Millet *et al.*, 2015; Yuan *et al.*, 2015).

### S2.2 Treatment of $\text{NPHENOLO}_2$

Sensitivity study on the treatment of  $\text{NPHENOLO}_2$  produced from the reaction of PHENOL with  $\text{NO}_3$ . For  $\text{NPHENOLO}_2$  various approximations are currently used: i) direct treatment, ii) approximation with  $\text{PHENO}_2$  and iii) approximation with NPHEN (see sect. 2.4). To test the different approaches, we performed sensitivity studies with URMELL for the urb\_05\_w scenario (Fig. S2-4). While URMELL itself considers the direct treatment of  $\text{NPHENOLO}_2$  (solid yellow line), for the  $\text{PHENO}_2$  run  $\text{NPHENOLO}_2$  is replaced by  $\text{PHENO}_2 + \text{NO}_2$  (dashed yellow line) and for the NPHEN run by NPHEN (dotted yellow line). The further oxidation of  $\text{PHENO}_2$  leads to  $\text{HO}_2$  formation while  $\text{NPHENOLO}_2$  produces  $\text{NO}_2$ . This increase in  $\text{HO}_2$  and decrease in  $\text{NO}_2$  enhance the  $\text{O}_3$  and consequently also the OH, and  $\text{NO}_3$  while lowering NO concentrations. As a consequent, oxidation processes are boosted lowering the reactant (e.g.  $\text{C}_5\text{H}_8$  Fig. S2-4d) and increasing the reaction product concentrations (remaining plots of Fig. S2-4). In contrast, the approximation with NPHEN has no significant impact on most of



the analyzed compounds except GLY (Fig. S2-4k), which decreases. The degradation of NPHENOLO<sub>2</sub> would lead to NO<sub>2</sub>, BIGACID1 and GLY formation, whereas NPHEN e.g. produces MALANHY but due to lower reaction coefficients of intermediate products (e.g. N2PHEN), these products build up.

### S2.3 Analysis of higher (remote) oxidant concentrations

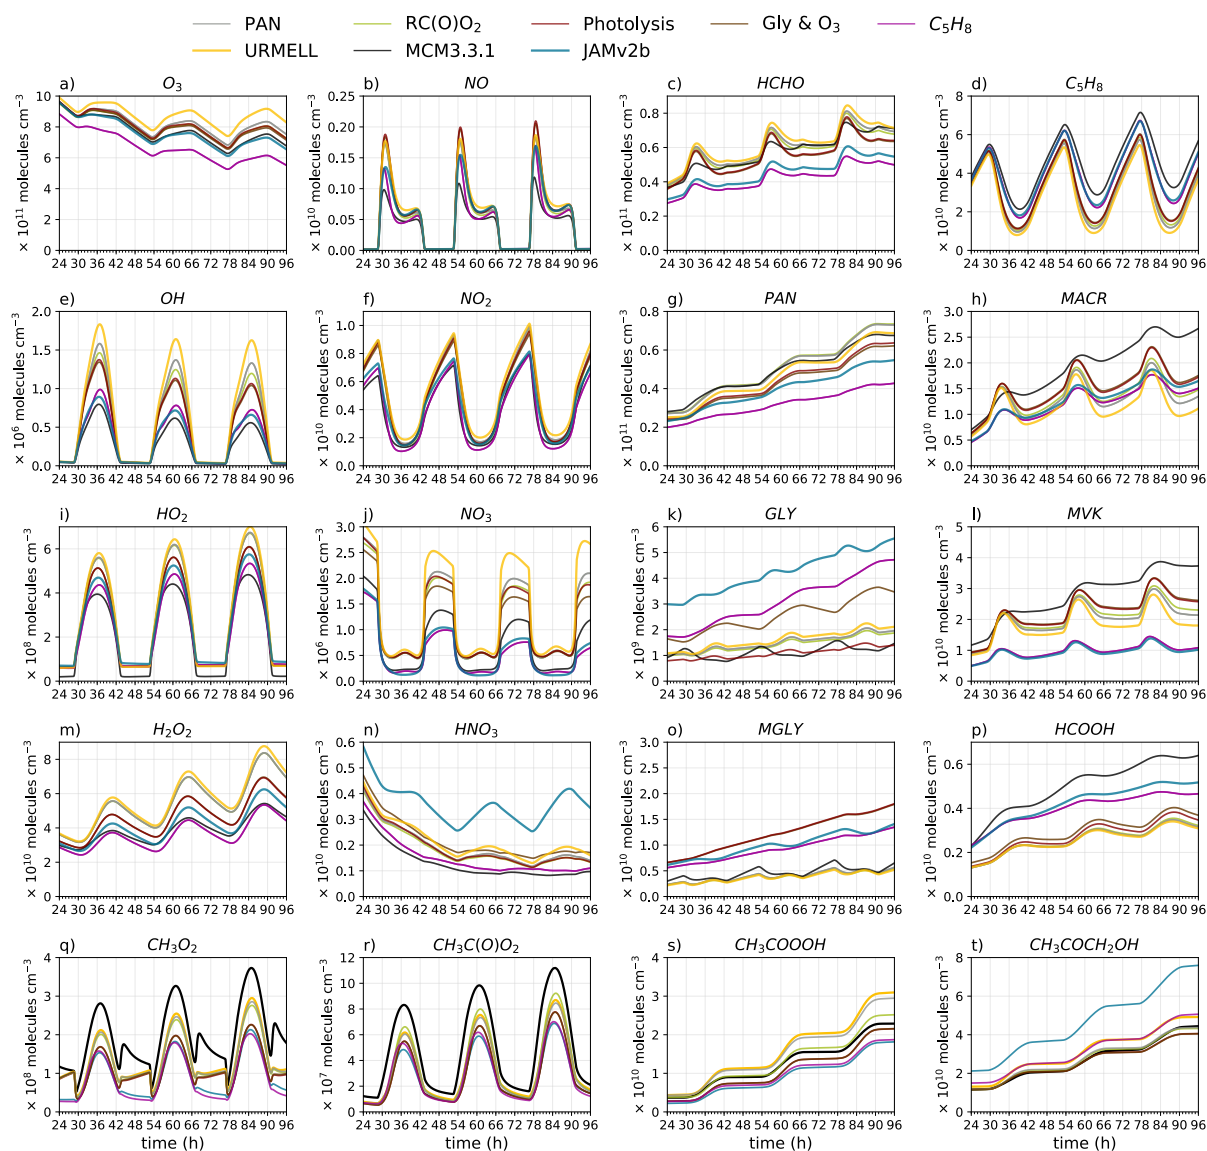

**Figure S2-1:** Time series of various gas-phase species for the remote summer case with full radiation for several sensitivity runs and additionally showing the MCM3.3.1, JAMv2b and URMELL.

To quantify the contribution of the mechanism adjustments/extensions, multiple sensitivity simulations were performed (overview of performed sensitivity studies is given in Table 5). Starting from the final URMELL mechanism several updates were successively replaced by the

original JAMv2b formulation. Fig. S2-1 illustrates the results of all sensitivity studies, the final URMELL version (yellow line), JAMv2b (blue line) and the MCM3.3.1 (black line).

### S2.3.1 RC(O)O<sub>2</sub> chemistry with separate PAN simulation

For RC(O)O<sub>2</sub> chemistry, the impact of the reaction with NO<sub>2</sub> to produce PAN and PAN-like (Fig. S2-1 grey line) species was investigated independent of the other RC(O)O<sub>2</sub> chemistry changes (Fig. S2-1 green line). For both sensitivity studies, O<sub>3</sub> (Fig. S2-1a), OH (Fig. S2-1e), HO<sub>2</sub> (Fig. S2-1i), NO (Fig. S2-1b), NO<sub>2</sub> (Fig. S2-1f), NO<sub>3</sub> (Fig. S2-1j) and HNO<sub>3</sub> (Fig. S2-1n) peak concentrations are lower with stronger reduction for the PAN simulation. The changed  $k_{\text{NO}_2}$  rate coefficient, resetting it to the faster value (see sect. 2.3) lowers the NO<sub>2</sub> (Fig. S2-1f) day time minimum and increases PAN (Fig. S2-1g) concentrations. As NO<sub>2</sub> photolysis is a major NO and O<sub>3</sub> source and subsequent O<sub>3</sub> photolysis impacts OH, their concentration declines and substance concentrations directly linked (HO<sub>2</sub>, H<sub>2</sub>O<sub>2</sub>, NO<sub>3</sub>, HNO<sub>3</sub>), too. As a consequence, common reaction partners such as C<sub>5</sub>H<sub>8</sub>, MACR and MVK increase while their reaction products (HCHO, GLY, CH<sub>3</sub>COOOH and CH<sub>3</sub>COCH<sub>2</sub>OH) decline.

Additional changes to RC(O)O<sub>2</sub> chemistry comprise NO, NO<sub>3</sub>, CH<sub>3</sub>O<sub>2</sub>, CH<sub>3</sub>C(O)O<sub>2</sub> and HO<sub>2</sub> reactions including their reaction rate coefficients and branching ratios (see Table S1-2 for more detail). The slower reaction rate constant of CH<sub>3</sub>C(O)O<sub>2</sub> with HO<sub>2</sub> (see sect. 2.3) enhances CH<sub>3</sub>C(O)O<sub>2</sub> concentrations (Fig. S2-1r) and decreases the reaction product CH<sub>3</sub>COOOH (Fig. S2-1s). This deceleration also diminishes OH conversion. Furthermore, not all HO<sub>2</sub> + RC(O)O<sub>2</sub> pathways in JAMv2b include O<sub>3</sub> and OH formation further reducing OH, O<sub>3</sub> and corresponding subsequent reaction partners. For OH and O<sub>3</sub>, the changes to RC(O)O<sub>2</sub> chemistry already account for most of the non-isoprene invoked deviations.

### S2.3.2 Photolysis

Most changes to photolysis (Fig. S2-1, red line) consider the photolysis rate constant and some (MVKN, CO<sub>2</sub>H<sub>3</sub>CHO, BIACETOH, BEPOMUC, TEPOMUC, BIGALD1, MEKNO<sub>3</sub>) also the branching ratios (see Table S1-4). Generally the changed photolysis rates become slower, and thus commonly produced photolysis products (e.g. CH<sub>3</sub>C(O)O<sub>2</sub>, CH<sub>3</sub>O<sub>2</sub>, HCHO, GLY, OH and HO<sub>2</sub>) decline while the sources such as MGLY increase (Fig. S2-1). In the case of the slower photolysis of MGLY a shift towards the OH degradation channel occurs, so instead of releasing HO<sub>2</sub> via photolysis the OH is consumed more frequently lowering HO<sub>x</sub>. This reduction in HO<sub>2</sub> concentration also lowers H<sub>2</sub>O<sub>2</sub> production (Fig. S2-1m). Lower PAN

(Fig. S2-1g) and  $\text{CH}_3\text{COOOH}$  (Fig. S2-1s) concentration as well a slight day-time  $\text{NO}$  (Fig. S2-1b) and  $\text{NO}_2$  (Fig. S2-1f) increase result from  $\text{CH}_3\text{C}(\text{O})\text{O}_2$  (Fig. S2-1r) reduction.

The reductions in  $\text{OH}$  and  $\text{O}_3$  lower the reaction frequency of  $\text{C}_3\text{H}_8$  (Fig. S2-1d),  $\text{MVK}$  (Fig. S2-1l) and  $\text{MACR}$  (Fig. S2-1h) causing a concentration increase. For  $\text{NO}$  (Fig. S2-1b), also an increase occurs, which is mainly forced by reduced concentrations of oxidation partners including  $\text{O}_3$ ,  $\text{CH}_3\text{C}(\text{O})\text{O}_2$ ,  $\text{CH}_3\text{O}_2$  and other peroxy radicals. Photolysis differences dominate the non-isoprene induced  $\text{HO}_2$ ,  $\text{H}_2\text{O}_2$  and  $\text{HCHO}$  reduction and  $\text{MGLY}$  increase.

### S2.3.3 GLY and ozonolysis implementation updates

$\text{GLY}$  (Section 2.1) and ozonolysis changes (Section 2.2) are jointly simulated (brown line in Fig. S2-1). As mentioned in sect 2.1. of the main manuscript, the reaction rate constant of  $\text{GLY}$  with  $\text{NO}_3$  in JAMv2b is four magnitudes higher than in URMELL. On the one hand, an increase of this reaction rate constant reduces  $\text{NO}_3$  concentration (Fig. S2-1j) but, on the other hand, leads to a non-expected increase of the  $\text{GLY}$  concentration (Fig. S2-1k).  $\text{GLY}$  oxidation is now dominated by  $\text{NO}_3$ , while beforehand it was mainly oxidized by  $\text{OH}$ . This also shifts the oxidation pathways of other substances in opposing manner, here the ratio of  $\text{NO}_3$  oxidation shrinks, while  $\text{O}_3$  and  $\text{OH}$  become more important.  $\text{OH}$  and  $\text{O}_3$  reaction channels are more efficient  $\text{GLY}$  sources compared to  $\text{NO}_3$  channels leading to a  $\text{GLY}$  increase. As the reaction of  $\text{GLY}$  with  $\text{NO}_3$  also produces  $\text{HNO}_3$  an increase is invoked, too. The increase in  $\text{HCOOH}$  (Fig. S2-1p) is invoked by ozonolysis changes.

### S2.3.4 Isoprene

Additional isoprene related deviations are mainly caused by  $\text{OH}$  oxidation, as well as  $\text{MVK}$  and  $\text{MACR}$  chemistry. When considering all isoprene related changes (purple line in Fig. S2-1),  $\text{OH}$  (Fig. S2-1e),  $\text{NO}$  (Fig. S2-1b),  $\text{NO}_2$  (Fig. S2-1f),  $\text{NO}_3$  (Fig. S2-1j),  $\text{HCHO}$  (Fig. S2-1c),  $\text{MGLY}$  (Fig. S2-1o),  $\text{HCOOH}$  (Fig. S2-1p), Isoprene (Fig. S2-1d), as well as  $\text{MVK}$  (Fig. S2-1l) and  $\text{MACR}$  (Fig. S2-1h) become very similar to JAMv2b (blue line in Fig. S2-1).

In JAMv2b the low  $\text{CH}_3\text{O}_2$  yield of 0.051 (0.407 in URMELL) of  $\text{C}_3\text{H}_8$  ozonolysis diminishes night-time  $\text{CH}_3\text{O}_2$  production (Fig S2-1q). The reaction of  $\text{CH}_3\text{O}_2$  with  $\text{NO}_2$  produces nitroperoxy methane ( $\text{CH}_3\text{O}_2\text{NO}_2$ ) and its decomposition is an important nighttime  $\text{NO}_2$  source. Therefore,  $\text{NO}_2$  nighttime concentrations (Fig. S2-1f) decline reaching similar nighttime peak concentrations as with JAMv2b. As  $\text{NO}$  chemistry is linked to  $\text{NO}_2$ ,  $\text{NO}$  concentrations (Fig. S2-1b) also decline.

The integration of H-shift reactions, enabling OH recycling, into isoprene chemistry has the most significant impact on OH (Fig. S2-1e). Therefore, neglecting this OH recycling lowers not just OH but H<sub>2</sub>O<sub>2</sub> (Fig. S2-1m) and HO<sub>2</sub> (Fig. S2-1i) concentrations. For compounds with multiple day-time degradation channels (reaction with HO<sub>x</sub>, NO<sub>x</sub>, O<sub>3</sub>, or photolysis) the oxidation is pushed towards the other pathways reducing the oxidant day-time concentrations, too. This has a major impact on O<sub>3</sub> as it is consumed more frequently, while at the same time its formation through RC(O)O<sub>2</sub> + HO<sub>2</sub> reaction stagnates. Therefore, O<sub>3</sub> decreases (Fig. S2-1a). The lack of oxidants increases C<sub>5</sub>H<sub>8</sub> (Fig. S2-1d) while lowering the reaction product concentrations of MACR (Fig. S2-1h), MVK (Fig. S2-1l) and HCHO (Fig. S2-1c).

Furthermore, the reduction in CH<sub>3</sub>O<sub>2</sub> and HO<sub>2</sub> also shifts the oxidation from peroxy radicals towards CH<sub>3</sub>C(O)O<sub>2</sub> and NO<sub>x</sub> resulting in lower day time concentrations. As the reactions of RC(O)O<sub>2</sub> with HO<sub>2</sub> produce O<sub>3</sub>, this further reduces O<sub>3</sub> concentrations. Additionally, a shift of peroxy radical oxidation from CH<sub>3</sub>O<sub>2</sub> towards CH<sub>3</sub>C(O)O<sub>2</sub> reduces HO<sub>2</sub> production rates, as CH<sub>3</sub>O<sub>2</sub> pathways usually have higher HO<sub>2</sub> yields.

The composition of the ISOPOO pool also plays a role. The chemical degradation of LISOPACO<sub>2</sub> seems to have a higher direct impact on O<sub>3</sub> depletion through the reaction of LHC4ACCHO with O<sub>3</sub> (this reaction is not part of Wennberg et al.<sup>1</sup>, but kept from Schultz *et al.*<sup>7</sup>, the MCM3.3.1 also suggest reactions with O<sub>3</sub>) compared to ISOPBO<sub>2</sub> and ISOPDO<sub>2</sub> leading to MVK/MACR ozonolysis reactions. Note that O<sub>3</sub> is additionally indirectly impacted through NO<sub>x</sub> rechanneling, as the degradation pathways of β and δ isoprene nitrates (ISOPBNO<sub>3</sub> & ISOPDNO<sub>3</sub>, LISOPACNO<sub>3</sub>) differ. Therefore, the contributions of the diverse ISOPOO pool plays an important role for NO<sub>x</sub> as well as O<sub>3</sub>. As a result, multiple interlinkages changed creating some kind of self-reinforcing effect leading to intensified O<sub>3</sub> reduction. As NO<sub>2</sub> + O<sub>3</sub> is the major NO<sub>3</sub> production pathway, NO<sub>3</sub> declines as both precursor decline. But note, that the sources of the higher daytime NO<sub>3</sub> concentrations of URMELL are from the reaction of MPAN (a MACR reaction product) with OH and O<sub>3</sub>, both yielding NO<sub>3</sub>. In the case of MPAN + OH, JAMv2b postulates NO<sub>2</sub> instead of NO<sub>3</sub> formation while the reaction with O<sub>3</sub> is missing.

The strong increase in HCOOH concentration is due to the high MVK + O<sub>3</sub> production ratio of 0.85 in JAMv2b compared to 0.025 in URMELL. Changes to CH<sub>3</sub>COCH<sub>2</sub>OH are also caused by ISOPOO pool composition, with multiple pathways (MACR, HPALD, LIECHO, LHC4ACCHO...). For GLY URMELL shows a stronger day-time production mainly linked to

newly implemented  $C_5H_8$  chemistry (MVK, ISOPOO pool) with a strong photolysis component and only moderate night-time production. Whereas the MCM3.3.1 simulates only minor day-time GLY but stronger night-time ozonolysis production. The main sources are NC4CHO, HPALD, OHCCH<sub>2</sub>OH and HCOCH<sub>2</sub>OOH. Based on the recommendation from Wennberg et al.,<sup>1</sup> URMELL only considers terminal OH addition channels for the  $C_5H_8 + OH$  reaction but the MCM3.3.1 also includes internal addition channels which lead to addition GLY ozonolysis formation.

For most species, a reset to the original JAMv2b increases the similarity to JAMv2b. One exception is  $HNO_3$  for which no approximation to JAMv2b is reached, but instead to MCM3.3.1. This is due to the treatment of  $HOCH_2CO_3$ . In JAMv2b, the reaction of  $HOCH_2CO_3$  with  $NO_2$  leads to  $HCHO + CO_2 + HNO_3$  while in MCM and URMELL a PAN-like (PHAN) substance is formed.  $HOCH_2CO_3$  is an important day- and nighttime  $HNO_3$  source in JAMv2b while for URMELL  $OH + NO_2$  is the major source. The lower OH and  $NO_2$  concentrations are also in better agreement with the MCM3.3.1 resulting in similar  $HNO_3$  simulations.

Fig. S2-2 till Fig S2-7 show additional plots for the urban and remote scenarios for various summer and winter cases as describe in the main text in sect. 4.1.

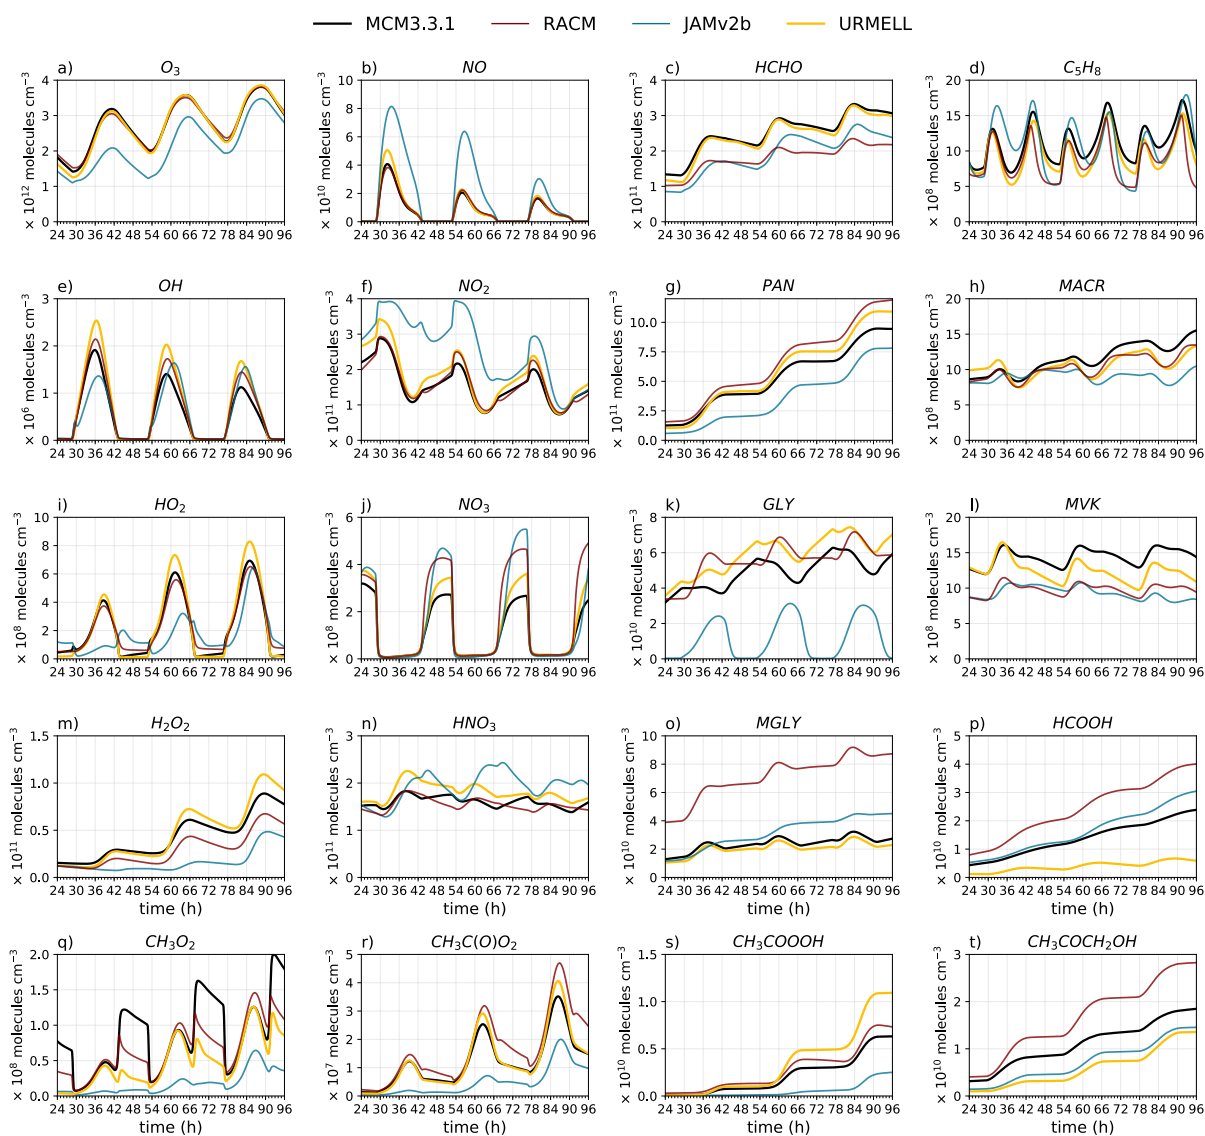

**Fig. S2-2:** Time series of various gas-phase compounds for the urban summer case with 50% attenuated actinic radiation (urb\_s\_05) modeled with MCM3.3.1 (black line), RACM (red line), JAMv2b (blue line) and URMELL (yellow line).

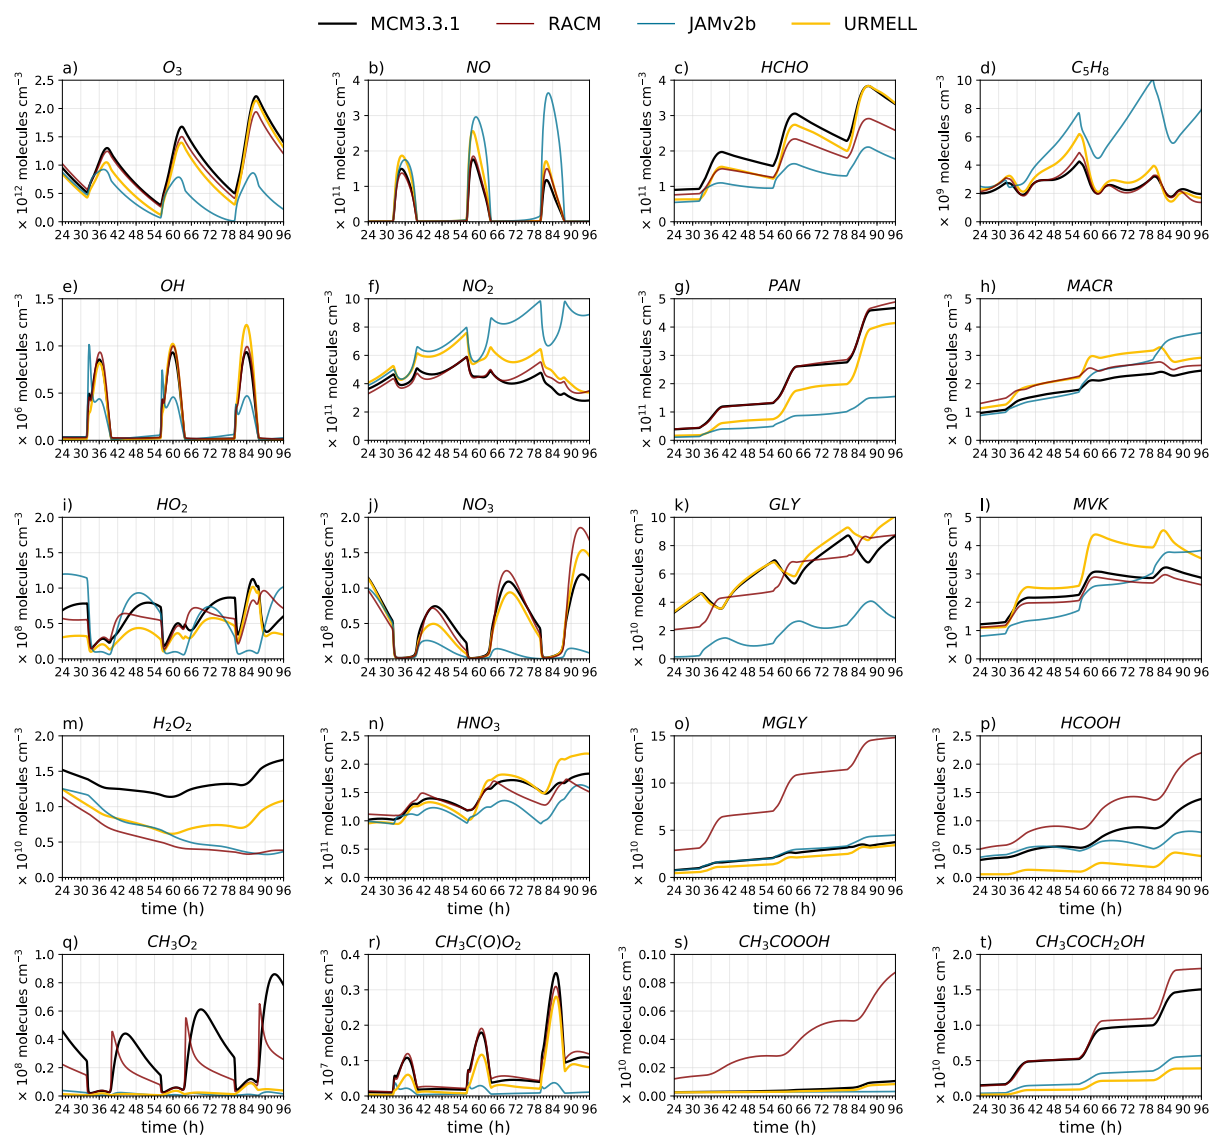

**Fig. S2-3:** Time series of various gas-phase compounds for the urban winter case with clear sky conditions (urb\_w\_1) modeled with MCM3.3.1 (black line), RACM (red line), JAMv2b (blue line) and URMELL (yellow line).

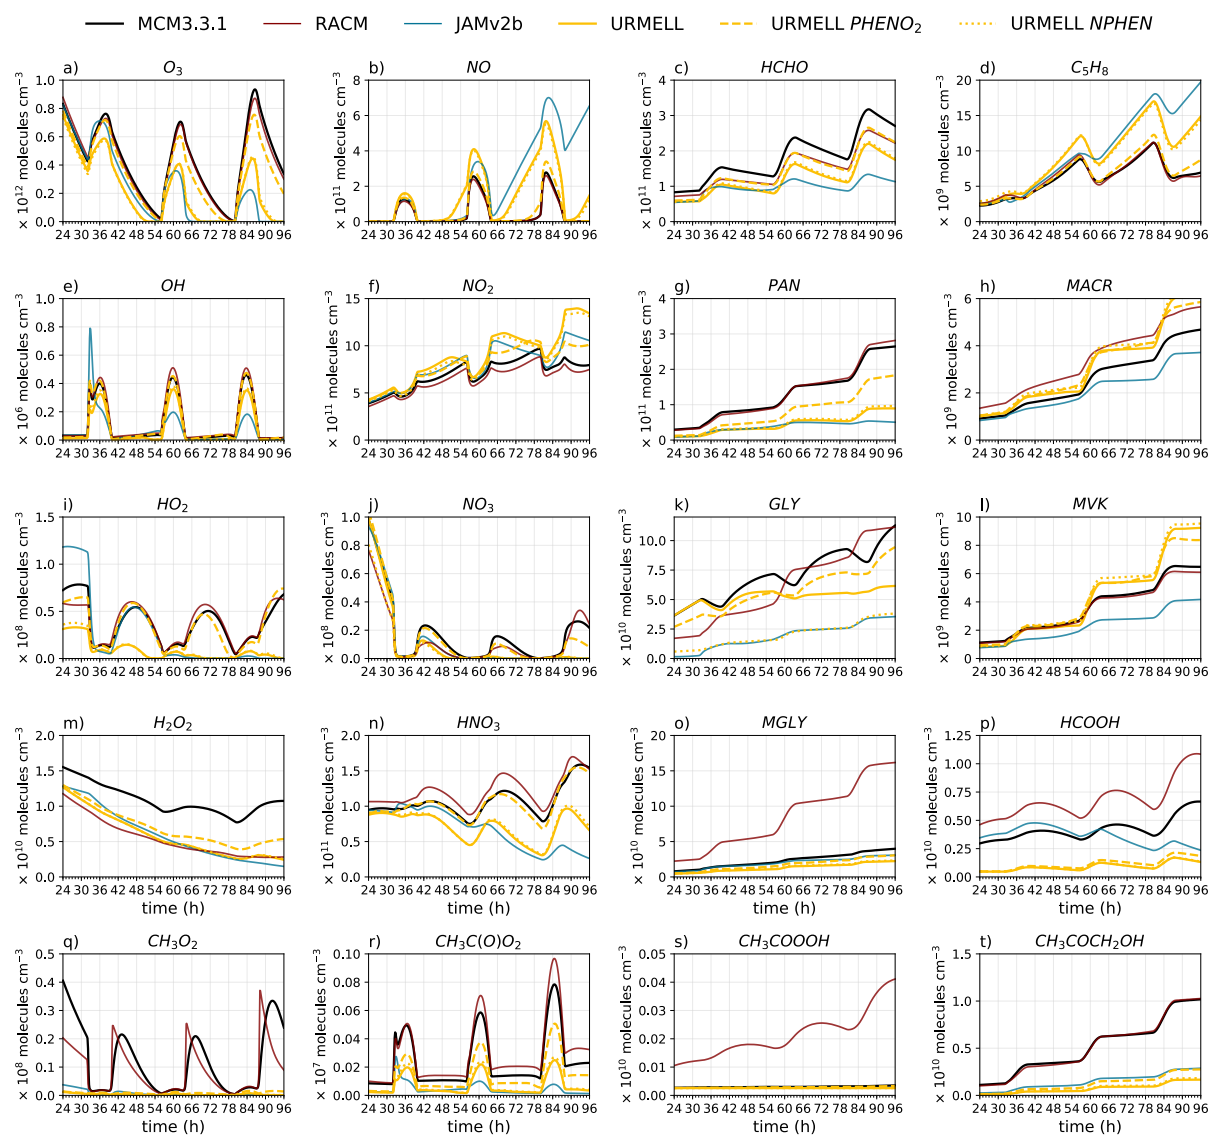

**Fig. S2-4:** Time series of various gas-phase compounds for the urban winter case with 50% attenuated actinic radiation (urb\_w\_05) modeled with MCM3.3.1 (black line), RACM (red line), JAMv2b (blue line), URMELL (yellow line) and for XYL+OH reaction rate constant of  $2.3 \times 10^{-11} \text{ cm}^3 \text{ molecule}^{-1} \text{ s}^{-1}$  (yellow dotted line).



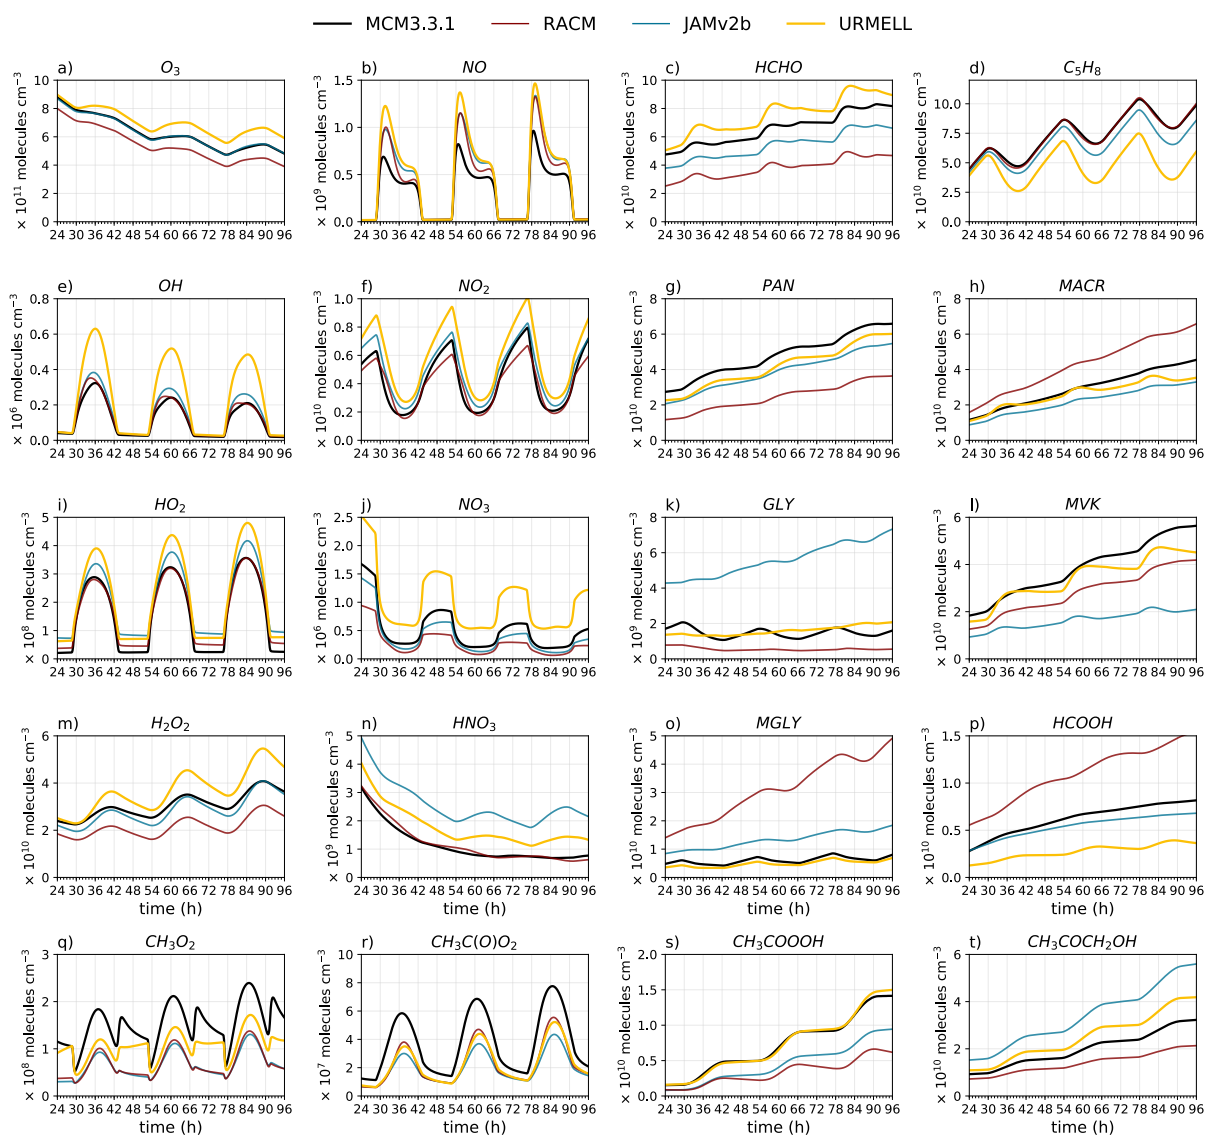

**Fig. S2-5:** Time series of various gas-phase compounds for the remote summer case with 50% attenuated actinic radiation (rem\_s\_05) modeled with MCM3.3.1 (black line), RACM (red line), JAMv2b (blue line) and URMELL (yellow line).

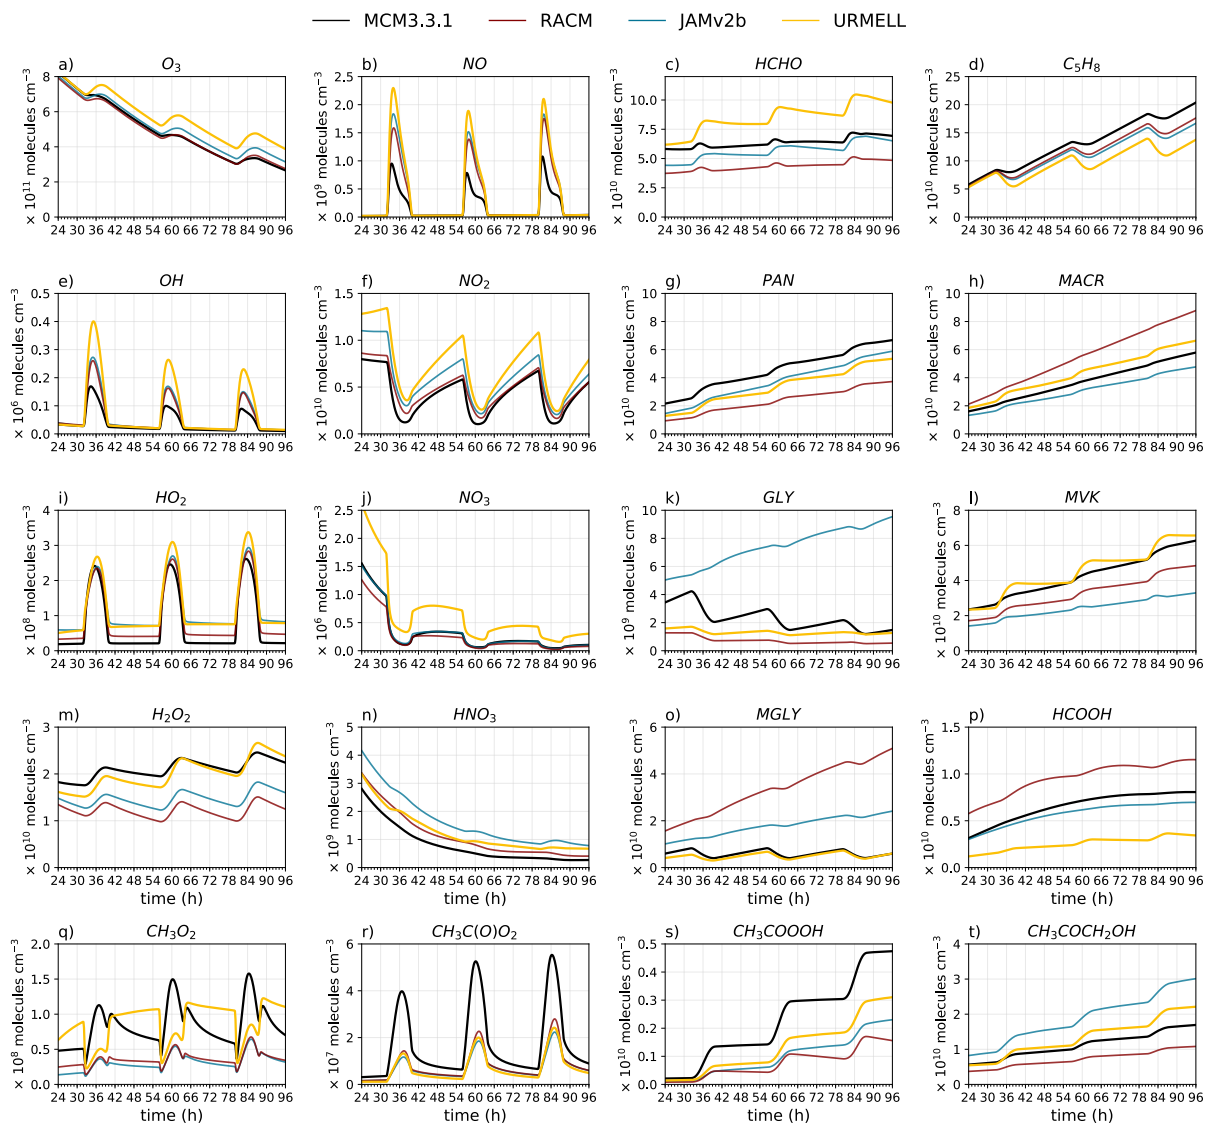

**Fig. S2-6:** Time series of various gas-phase compounds for the remote winter case with clear sky conditions (rem\_w\_1) modeled with MCM3.3.1 (black line), RACM (red line), JAMv2b (blue line) and URMELL (yellow line).

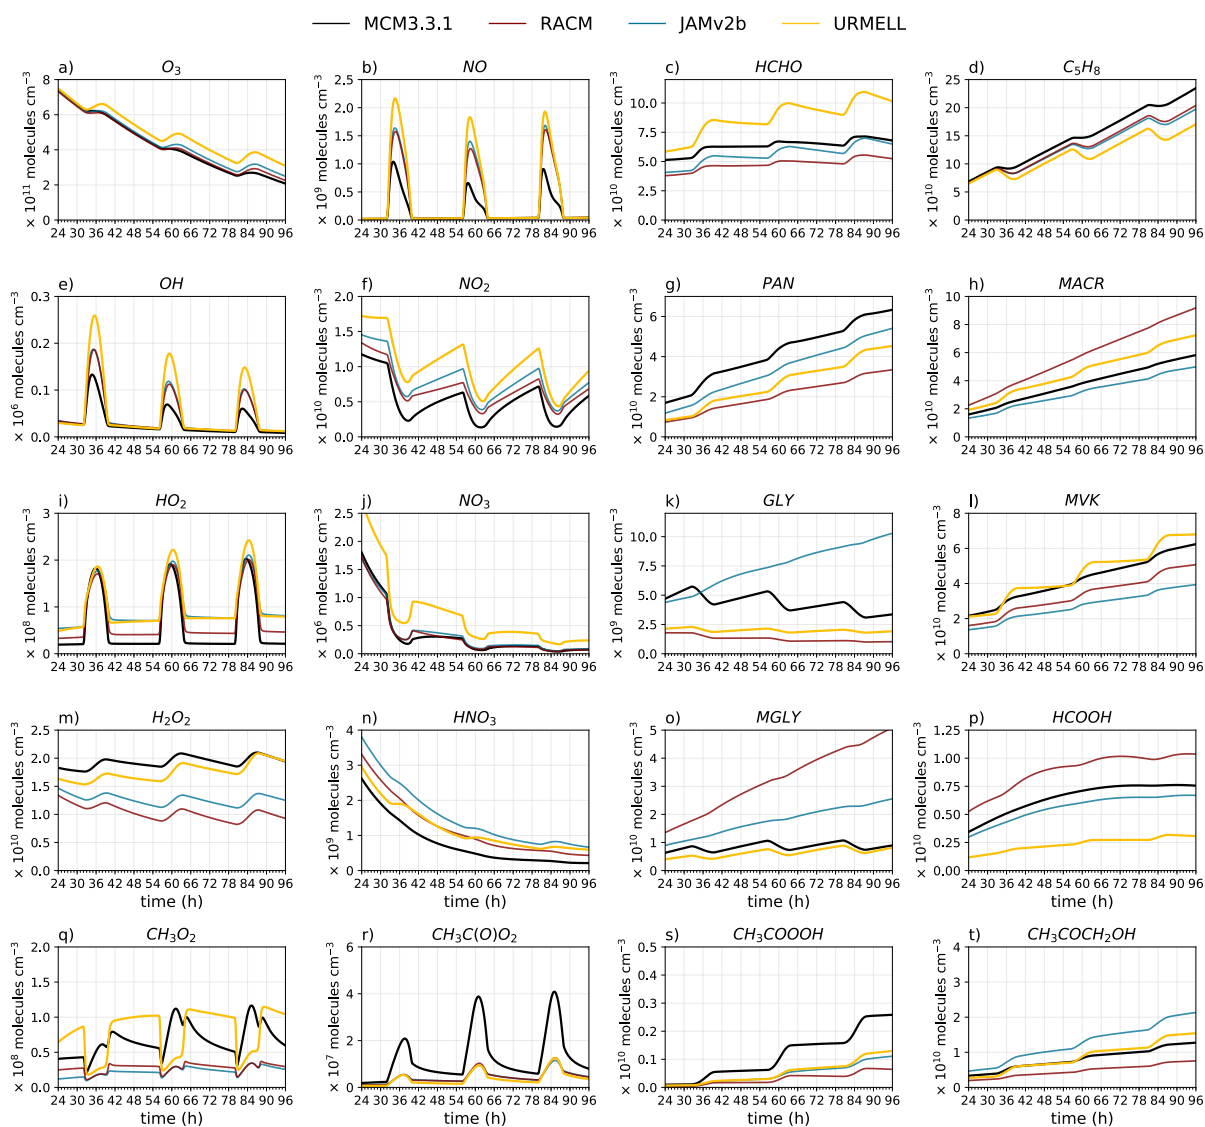

**Fig. S2-7:** Time series of various gas-phase compounds for the remote winter case with 50% attenuated actinic radiation (rem\_w\_05) modeled with MCM3.3.1 (black line), RACM (red line), JAMv2b (blue line) and URMELL (yellow line).

**Table S2-1:** Correlation and COD values between MCM3.3.1 and URMELL, Jamv2b and RACM for box model simulations and the various scenarios indicated by the first three columns: scenario (urban/remote), season (summer s/winter w) and solar radiation (full radiation \_1/ 50% attenuated actinic radiation \_05). Bold numbers highlight highest R values indicating best representation of MCM3.3.1 concentration trends and lowest COD for closest MCM3.3.1 approximation.

| Scenario                           | Season                               | Rad.         | Species                            | URMELL       |              | JAMv2b       |              | RACM         |              |
|------------------------------------|--------------------------------------|--------------|------------------------------------|--------------|--------------|--------------|--------------|--------------|--------------|
|                                    |                                      |              |                                    | R            | COD          | R            | COD          | R            | COD          |
| urban                              | summer                               | 05           | O <sub>3</sub>                     | <b>0.998</b> | <b>0.023</b> | <b>0.917</b> | 0.157        | 0.995        | 0.015        |
|                                    |                                      |              | NO                                 | <b>0.997</b> | <b>0.080</b> | <b>0.920</b> | 0.352        | 0.996        | <b>0.075</b> |
|                                    |                                      |              | NO <sub>2</sub>                    | <b>0.999</b> | <b>0.067</b> | 0.709        | 0.277        | 0.975        | <b>0.043</b> |
|                                    |                                      |              | OH                                 | <b>0.995</b> | 0.291        | 0.889        | <b>0.189</b> | 0.994        | <b>0.144</b> |
|                                    |                                      |              | HO <sub>2</sub>                    | <b>0.998</b> | <b>0.237</b> | 0.663        | 0.511        | 0.989        | 0.281        |
|                                    |                                      |              | H <sub>2</sub> O <sub>2</sub>      | <b>0.999</b> | <b>0.083</b> | 0.847        | 0.474        | 0.995        | 0.200        |
|                                    |                                      |              | NO <sub>3</sub>                    | <b>0.998</b> | <b>0.073</b> | 0.956        | 0.240        | 0.958        | 0.180        |
|                                    |                                      |              | HNO <sub>3</sub>                   | <b>0.857</b> | <b>0.066</b> | 0.042        | 0.122        | 0.581        | <b>0.040</b> |
|                                    |                                      |              | HCHO                               | <b>0.998</b> | <b>0.030</b> | 0.965        | 0.158        | 0.995        | 0.160        |
|                                    |                                      |              | PAN                                | <b>1.000</b> | <b>0.061</b> | 0.987        | 0.268        | <b>1.000</b> | 0.098        |
|                                    |                                      |              | GLY                                | <b>0.968</b> | <b>0.097</b> | -0.149       | 0.725        | 0.588        | 0.102        |
|                                    |                                      |              | MGLY                               | <b>0.986</b> | <b>0.078</b> | 0.848        | 0.162        | 0.940        | 0.498        |
|                                    |                                      |              | C <sub>3</sub> H <sub>8</sub>      | <b>0.958</b> | <b>0.096</b> | 0.734        | 0.140        | 0.802        | 0.165        |
|                                    |                                      |              | MACR                               | <b>0.826</b> | <b>0.066</b> | 0.278        | 0.141        | <b>0.963</b> | <b>0.055</b> |
|                                    |                                      |              | MVK                                | <b>0.598</b> | <b>0.090</b> | 0.225        | 0.221        | <b>0.940</b> | 0.190        |
|                                    |                                      |              | HCOOH                              | 0.947        | 0.556        | <b>0.995</b> | <b>0.081</b> | <b>0.998</b> | 0.280        |
|                                    |                                      |              | CH <sub>3</sub> O <sub>2</sub>     | <b>0.622</b> | <b>0.395</b> | 0.573        | 0.692        | <b>0.771</b> | <b>0.199</b> |
|                                    |                                      |              | CH <sub>3</sub> C(O)O <sub>2</sub> | <b>0.999</b> | <b>0.079</b> | 0.894        | 0.532        | 0.978        | 0.168        |
|                                    | CH <sub>3</sub> COOOH                | <b>0.999</b> | <b>0.194</b>                       | 0.940        | 0.659        | <b>0.999</b> | 0.281        |              |              |
|                                    | CH <sub>3</sub> COCH <sub>2</sub> OH | 0.971        | 0.388                              | <b>0.988</b> | <b>0.271</b> | <b>0.999</b> | <b>0.193</b> |              |              |
|                                    | winter                               | 1            | O <sub>3</sub>                     | <b>0.990</b> | <b>0.152</b> | 0.466        | 0.478        | <b>0.991</b> | <b>0.057</b> |
|                                    |                                      |              | NO                                 | <b>0.996</b> | <b>0.174</b> | 0.864        | 0.508        | 0.989        | 0.102        |
|                                    |                                      |              | NO <sub>2</sub>                    | <b>0.925</b> | <b>0.121</b> | -0.202       | 0.278        | 0.830        | <b>0.052</b> |
|                                    |                                      |              | OH                                 | <b>0.983</b> | <b>0.281</b> | 0.863        | 0.289        | <b>0.997</b> | <b>0.073</b> |
|                                    |                                      |              | HO <sub>2</sub>                    | <b>0.803</b> | <b>0.243</b> | 0.411        | 0.390        | 0.514        | 0.165        |
|                                    |                                      |              | H <sub>2</sub> O <sub>2</sub>      | <b>0.806</b> | <b>0.244</b> | -0.075       | 0.404        | 0.105        | 0.456        |
|                                    |                                      |              | NO <sub>3</sub>                    | <b>0.947</b> | <b>0.180</b> | 0.463        | 0.633        | 0.936        | <b>0.136</b> |
|                                    |                                      |              | HNO <sub>3</sub>                   | <b>0.964</b> | <b>0.051</b> | 0.798        | 0.107        | 0.883        | <b>0.044</b> |
| HCHO                               |                                      |              | <b>0.995</b>                       | <b>0.107</b> | 0.991        | 0.275        | <b>0.999</b> | 0.122        |              |
| PAN                                |                                      |              | 0.993                              | <b>0.264</b> | <b>0.997</b> | 0.491        | <b>1.000</b> | <b>0.012</b> |              |
| GLY                                | <b>0.981</b>                         | <b>0.044</b> | 0.720                              | 0.601        | 0.850        | 0.138        |              |              |              |
| MGLY                               | <b>0.989</b>                         | 0.167        | 0.988                              | <b>0.051</b> | <b>0.990</b> | 0.577        |              |              |              |
| C <sub>3</sub> H <sub>8</sub>      | <b>0.975</b>                         | <b>0.101</b> | 0.298                              | 0.378        | 0.966        | <b>0.055</b> |              |              |              |
| MACR                               | <b>0.981</b>                         | 0.122        | 0.934                              | <b>0.107</b> | <b>0.989</b> | <b>0.101</b> |              |              |              |
| MVK                                | <b>0.991</b>                         | <b>0.120</b> | 0.904                              | 0.144        | <b>0.999</b> | <b>0.042</b> |              |              |              |
| HCOOH                              | <b>0.942</b>                         | 0.603        | 0.923                              | <b>0.141</b> | <b>0.999</b> | 0.241        |              |              |              |
| CH <sub>3</sub> O <sub>2</sub>     | 0.116                                | <b>0.785</b> | <b>0.547</b>                       | 0.867        | <b>0.638</b> | <b>0.327</b> |              |              |              |
| CH <sub>3</sub> C(O)O <sub>2</sub> | <b>0.987</b>                         | <b>0.309</b> | 0.836                              | 0.681        | <b>0.989</b> | <b>0.094</b> |              |              |              |
| CH <sub>3</sub> COOOH              | <b>0.992</b>                         | <b>0.105</b> | 0.870                              | 0.257        | 0.947        | 0.766        |              |              |              |

|  |  |    |                                      |              |              |              |              |              |              |
|--|--|----|--------------------------------------|--------------|--------------|--------------|--------------|--------------|--------------|
|  |  |    | CH <sub>3</sub> COCH <sub>2</sub> OH | 0.994        | 0.679        | <b>0.998</b> | <b>0.512</b> | <b>0.998</b> | <b>0.048</b> |
|  |  | 05 | O <sub>3</sub>                       | <b>0.765</b> | 0.650        | 0.589        | <b>0.640</b> | <b>0.995</b> | <b>0.059</b> |
|  |  |    | NO                                   | <b>0.804</b> | 0.642        | 0.448        | <b>0.620</b> | <b>1.000</b> | <b>0.067</b> |
|  |  |    | NO <sub>2</sub>                      | <b>0.850</b> | 0.123        | 0.910        | <b>0.073</b> | <b>0.999</b> | <b>0.044</b> |
|  |  |    | OH                                   | <b>0.993</b> | 0.435        | 0.737        | <b>0.386</b> | <b>0.998</b> | <b>0.136</b> |
|  |  |    | HO <sub>2</sub>                      | 0.616        | 0.703        | <b>0.722</b> | <b>0.671</b> | <b>0.918</b> | <b>0.086</b> |
|  |  |    | H <sub>2</sub> O <sub>2</sub>        | <b>0.939</b> | <b>0.381</b> | 0.905        | 0.414        | 0.931        | 0.391        |
|  |  |    | NO <sub>3</sub>                      | 0.938        | 0.717        | <b>0.967</b> | <b>0.705</b> | <b>0.971</b> | <b>0.296</b> |
|  |  |    | HNO <sub>3</sub>                     | <b>0.429</b> | <b>0.244</b> | -0.397       | 0.346        | <b>0.965</b> | <b>0.069</b> |
|  |  |    | HCHO                                 | <b>0.997</b> | <b>0.207</b> | 0.909        | 0.296        | <b>0.999</b> | <b>0.099</b> |
|  |  |    | PAN                                  | <b>0.997</b> | <b>0.489</b> | 0.885        | 0.525        | <b>0.999</b> | <b>0.028</b> |
|  |  |    | GLY                                  | 0.888        | <b>0.158</b> | <b>0.914</b> | 0.625        | <b>0.912</b> | 0.199        |
|  |  |    | MGLY                                 | <b>0.998</b> | 0.280        | 0.991        | <b>0.075</b> | 0.994        | 0.545        |
|  |  |    | C <sub>3</sub> H <sub>8</sub>        | <b>0.956</b> | <b>0.192</b> | 0.812        | 0.234        | <b>0.987</b> | <b>0.040</b> |
|  |  |    | MACR                                 | 0.995        | <b>0.089</b> | <b>0.997</b> | 0.094        | <b>0.997</b> | 0.154        |
|  |  |    | MVK                                  | 0.993        | <b>0.106</b> | <b>0.996</b> | 0.217        | <b>1.000</b> | <b>0.019</b> |
|  |  |    | HCOOH                                | <b>0.881</b> | 0.653        | -0.452       | <b>0.183</b> | <b>0.998</b> | 0.235        |
|  |  |    | CH <sub>3</sub> O <sub>2</sub>       | 0.240        | <b>0.865</b> | <b>0.583</b> | 0.869        | <b>0.761</b> | <b>0.218</b> |
|  |  |    | CH <sub>3</sub> C(O)O <sub>2</sub>   | <b>0.971</b> | <b>0.602</b> | 0.596        | 0.684        | <b>0.985</b> | <b>0.135</b> |
|  |  |    | CH <sub>3</sub> COOOH                | <b>0.559</b> | 0.087        | 0.480        | <b>0.060</b> | <b>0.951</b> | 0.733        |
|  |  |    | CH <sub>3</sub> COCH <sub>2</sub> OH | 0.995        | 0.766        | <b>0.999</b> | <b>0.563</b> | <b>1.000</b> | <b>0.025</b> |

|        |   |                 |                                      |        |       |        |       |       |       |
|--------|---|-----------------|--------------------------------------|--------|-------|--------|-------|-------|-------|
| remote | s | 05              | O <sub>3</sub>                       | 0.984  | 0.067 | 0.999  | 0.004 | 0.999 | 0.077 |
|        |   |                 | NO                                   | 0.982  | 0.170 | 0.987  | 0.154 | 0.982 | 0.140 |
|        |   |                 | NO <sub>2</sub>                      | 0.970  | 0.189 | 0.982  | 0.104 | 0.970 | 0.064 |
|        |   |                 | OH                                   | 0.991  | 0.275 | 0.998  | 0.106 | 0.992 | 0.061 |
|        |   |                 | HO <sub>2</sub>                      | 0.992  | 0.337 | 0.991  | 0.368 | 0.997 | 0.216 |
|        |   |                 | H <sub>2</sub> O <sub>2</sub>        | 0.997  | 0.095 | 0.993  | 0.045 | 0.976 | 0.178 |
|        |   |                 | NO <sub>3</sub>                      | 0.981  | 0.370 | 0.994  | 0.168 | 0.987 | 0.343 |
|        |   |                 | HNO <sub>3</sub>                     | 0.986  | 0.251 | 0.958  | 0.424 | 0.993 | 0.050 |
|        |   |                 | HCHO                                 | 0.980  | 0.072 | 0.997  | 0.101 | 0.987 | 0.269 |
|        |   |                 | PAN                                  | 0.999  | 0.075 | 0.998  | 0.110 | 0.999 | 0.334 |
|        |   |                 | GLY                                  | -0.051 | 0.121 | -0.121 | 0.585 | 0.754 | 0.452 |
|        |   |                 | MGLY                                 | 0.964  | 0.117 | 0.777  | 0.375 | 0.752 | 0.663 |
|        |   |                 | C <sub>3</sub> H <sub>8</sub>        | 0.727  | 0.238 | 0.983  | 0.063 | 0.999 | 0.009 |
|        |   |                 | MACR                                 | 0.978  | 0.061 | 0.999  | 0.138 | 0.999 | 0.184 |
|        |   |                 | MVK                                  | 0.980  | 0.062 | 0.967  | 0.394 | 1.000 | 0.156 |
|        |   |                 | HCOOH                                | 0.968  | 0.393 | 0.999  | 0.069 | 0.989 | 0.274 |
|        |   |                 | CH <sub>3</sub> O <sub>2</sub>       | 0.903  | 0.182 | 0.868  | 0.415 | 0.865 | 0.400 |
|        |   |                 | CH <sub>3</sub> C(O)O <sub>2</sub>   | 0.971  | 0.249 | 0.975  | 0.300 | 0.972 | 0.257 |
|        |   |                 | CH <sub>3</sub> COOOH                | 0.999  | 0.020 | 0.999  | 0.252 | 0.993 | 0.358 |
|        |   |                 | CH <sub>3</sub> COCH <sub>2</sub> OH | 1.000  | 0.109 | 1.000  | 0.256 | 1.000 | 0.170 |
| w      | 1 | O <sub>3</sub>  | 0.988                                | 0.107  | 0.997 | 0.044  | 0.999 | 0.014 |       |
|        |   | NO              | 0.971                                | 0.241  | 0.971 | 0.229  | 0.970 | 0.198 |       |
|        |   | NO <sub>2</sub> | 0.963                                | 0.316  | 0.969 | 0.226  | 0.979 | 0.143 |       |
|        |   | OH              | 0.981                                | 0.241  | 0.993 | 0.167  | 0.991 | 0.145 |       |
|        |   | HO <sub>2</sub> | 0.982                                | 0.452  | 0.980 | 0.466  | 0.989 | 0.280 |       |

|  |  |    |                                      |        |       |        |       |        |       |
|--|--|----|--------------------------------------|--------|-------|--------|-------|--------|-------|
|  |  |    | H <sub>2</sub> O <sub>2</sub>        | 0.973  | 0.046 | 0.853  | 0.181 | 0.612  | 0.271 |
|  |  |    | NO <sub>3</sub>                      | 0.995  | 0.446 | 0.999  | 0.039 | 0.999  | 0.139 |
|  |  |    | HNO <sub>3</sub>                     | 0.995  | 0.303 | 0.994  | 0.412 | 0.998  | 0.203 |
|  |  |    | HCHO                                 | 0.929  | 0.148 | 0.945  | 0.069 | 0.991  | 0.189 |
|  |  |    | PAN                                  | 0.999  | 0.173 | 0.999  | 0.118 | 0.999  | 0.331 |
|  |  |    | GLY                                  | 0.947  | 0.268 | -0.833 | 0.553 | 0.948  | 0.513 |
|  |  |    | MGLY                                 | 0.826  | 0.110 | -0.146 | 0.501 | -0.178 | 0.686 |
|  |  |    | C <sub>3</sub> H <sub>8</sub>        | 0.953  | 0.157 | 0.992  | 0.080 | 0.995  | 0.059 |
|  |  |    | MACR                                 | 0.998  | 0.080 | 0.999  | 0.095 | 1.000  | 0.192 |
|  |  |    | MVK                                  | 0.986  | 0.043 | 0.993  | 0.272 | 0.999  | 0.134 |
|  |  |    | HCOOH                                | 0.959  | 0.445 | 1.000  | 0.065 | 0.993  | 0.194 |
|  |  |    | CH <sub>3</sub> O <sub>2</sub>       | -0.053 | 0.236 | 0.937  | 0.460 | 0.914  | 0.393 |
|  |  |    | CH <sub>3</sub> C(O)O <sub>2</sub>   | 0.972  | 0.425 | 0.943  | 0.367 | 0.952  | 0.335 |
|  |  |    | CH <sub>3</sub> COOOH                | 0.996  | 0.272 | 0.995  | 0.395 | 0.994  | 0.496 |
|  |  |    | CH <sub>3</sub> COCH <sub>2</sub> OH | 0.999  | 0.089 | 1.000  | 0.248 | 1.000  | 0.214 |
|  |  | 05 | O <sub>3</sub>                       | 0.992  | 0.106 | 0.998  | 0.044 | 0.999  | 0.019 |
|  |  |    | NO                                   | 0.964  | 0.268 | 0.957  | 0.245 | 0.954  | 0.228 |
|  |  |    | NO <sub>2</sub>                      | 0.955  | 0.383 | 0.985  | 0.277 | 0.982  | 0.218 |
|  |  |    | OH                                   | 0.958  | 0.229 | 0.981  | 0.166 | 0.979  | 0.155 |
|  |  |    | HO <sub>2</sub>                      | 0.973  | 0.450 | 0.974  | 0.458 | 0.988  | 0.278 |
|  |  |    | H <sub>2</sub> O <sub>2</sub>        | 0.882  | 0.056 | 0.270  | 0.211 | -0.103 | 0.312 |
|  |  |    | NO <sub>3</sub>                      | 0.982  | 0.480 | 0.995  | 0.110 | 0.995  | 0.075 |
|  |  |    | HNO <sub>3</sub>                     | 0.992  | 0.325 | 0.995  | 0.409 | 0.998  | 0.280 |
|  |  |    | HCHO                                 | 0.985  | 0.161 | 0.980  | 0.069 | 0.990  | 0.142 |
|  |  |    | PAN                                  | 0.997  | 0.248 | 0.997  | 0.126 | 0.998  | 0.348 |
|  |  |    | GLY                                  | 0.902  | 0.371 | -0.804 | 0.308 | 0.845  | 0.548 |
|  |  |    | MGLY                                 | 0.860  | 0.161 | 0.460  | 0.354 | 0.438  | 0.571 |
|  |  |    | C <sub>3</sub> H <sub>8</sub>        | 0.980  | 0.119 | 0.996  | 0.063 | 0.997  | 0.052 |
|  |  |    | MACR                                 | 0.999  | 0.105 | 0.999  | 0.085 | 1.000  | 0.207 |
|  |  |    | MVK                                  | 0.991  | 0.044 | 0.999  | 0.219 | 0.999  | 0.121 |
|  |  |    | HCOOH                                | 0.964  | 0.471 | 0.999  | 0.075 | 0.994  | 0.159 |
|  |  |    | CH <sub>3</sub> O <sub>2</sub>       | 0.092  | 0.272 | 0.900  | 0.488 | 0.631  | 0.405 |
|  |  |    | CH <sub>3</sub> C(O)O <sub>2</sub>   | 0.969  | 0.534 | 0.945  | 0.427 | 0.957  | 0.429 |
|  |  |    | CH <sub>3</sub> COOOH                | 0.996  | 0.353 | 0.996  | 0.384 | 0.998  | 0.546 |
|  |  |    | CH <sub>3</sub> COCH <sub>2</sub> OH | 0.998  | 0.066 | 0.999  | 0.214 | 1.000  | 0.261 |

## Supplement S3 – CTM simulations

Supplement S3 contains the information about the time series analysis including an overview of all selected measurement sites in Table S3-1 and statistics for the entire time series in Table S3-2 und for the mean diurnal cycle of May 2014 in Table S3-3. A map with the dominated land use type distribution and colored ozone correlation values for all considered measurement sites are presented in Fig. S3-1. Time series are shown for selected sites for O<sub>3</sub>, NO<sub>2</sub> and NO in fig. S3.2-1 till S3.2-5. For the mechanism comparison in remote areas also plots showing modeled OH, ISO, API+BPI and LIM+MYRC concentration time series for Kellerwald, Simmerath, Schmuecke and Spreewald are shown (Fig. S3.2-6 till S3.2-).

**Table S3-1:** Overview about the 57 measurement sites considered for the comparisons providing their name, longitude, latitude, station code, classification (24 remote background (BR), 13 urban background (BU), 7 traffic (T) and 12 industrial/traffic and industrial (IR/IU/TI)) and indication of O<sub>3</sub>, NO<sub>2</sub> and NO data availability. Information about the German measurement network used for this study, with links to data and additional information can be found at the station database provided by the German Environment Agency (Umwelt Bundesamt - UBA): <https://www.env-it.de/stationen/public/networkList.do>

| Site                 | Longitude | Latitude  | Station code | Classification | O <sub>3</sub> | NO <sub>2</sub> | NO |
|----------------------|-----------|-----------|--------------|----------------|----------------|-----------------|----|
| Neuglobsow           | 13.031662 | 53.141303 | DEUB030      | BR             | X              | X               |    |
| Schmuecke            | 10.769534 | 50.654066 | DEUB029      | BR             | X              | X               | X  |
| Waldhof              | 10.756733 | 52.800773 | DEUB005      | BR             | X              | X               | X  |
| Westerland           | 8.308208  | 54.924967 | DEUB001      | BR             | X              | X               | X  |
| Zingst               | 12.721938 | 54.436985 | DEUB028      | BR             | X              | X               | X  |
| Schwedt/Oder         | 14.285139 | 53.064262 | DEBB029      | TI             | X              |                 |    |
| Eisenhuettenstadt    | 14.638166 | 52.146264 | DEBB032      | TI             | X              |                 |    |
| Mannheim/Nord        | 8.465281  | 49.544078 | DEBW005      | TI             | X              | X               | X  |
| Salzgitter/Druette   | 10.455910 | 52.153690 | DENI070      | IR             | X              | X               |    |
| Bottrop-Welheim      | 6.976880  | 51.525955 | DENW021      | IU             | X              | X               |    |
| Duisburg-Walsum      | 6.748363  | 51.524030 | DENW034      | IU             | X              | X               |    |
| Trier/Eitzstr.       | 6.690258  | 49.784023 | DERP047      | TI             | X              | X               |    |
| Bitterfeld/Wolfen    | 12.302866 | 51.651166 | DEST015      | TI             | X              | X               |    |
| Niederzier           | 6.469312  | 50.883484 | DENW074      | IR             | X              |                 |    |
| Leuna                | 12.032141 | 51.321364 | DEST090      | TI             | X              | X               | X  |
| Berlin Marienfelde   | 13.368103 | 52.398406 | DEBE027      | IR             | X              | X               |    |
| Bremen               | 8.695060  | 53.117700 | DEHB013      | IR             | X              | X               |    |
| Neubrandenburg       | 13.266440 | 53.559784 | DEMV003      | T              | X              | X               |    |
| Koblenz              | 7.596633  | 50.354403 | DERP024      | T              | X              | X               |    |
| Erfurt/Kraempferstr. | 11.037924 | 50.979455 | DETH020      | T              | X              | X               |    |
| Frankfurt/Hoechst    | 8.542517  | 50.101750 | DEHE005      | T              | X              | X               | X  |
| Saarbruecken/Verkehr | 7.003174  | 49.230740 | DESL020      | T              | X              | X               | X  |
| Karlsruhe/Nordwest   | 8.355628  | 49.028594 | DEBW081      | T              | X              | X               | X  |
| Elsterwerda          | 13.526796 | 51.462734 | DEBB007      | T              | X              |                 |    |
| Cottbus              | 14.334470 | 51.746848 | DEBB064      | BU             | X              | X               |    |
| Berlin Wedding       | 13.349326 | 52.543041 | DEBE010      | BU             | X              | X               | X  |

| Site                 | Longitude  | Latitude  | Station code | Classification | O <sub>3</sub> | NO <sub>2</sub> | NO |
|----------------------|------------|-----------|--------------|----------------|----------------|-----------------|----|
| Rostock/Warnemuende  | 12.080003  | 54.171330 | DEMV021      | BU             | X              | X               |    |
| Hamburg/Sternschanze | 9.967882   | 53.564140 | DEHH008      | BU             | X              |                 |    |
| Frankfurt/Ost        | 8.746343   | 50.125332 | DEHE008      | BU             | X              | X               | X  |
| Wiesbaden/Sued       | 8.244949   | 50.050343 | DEHE022      | BU             | X              | X               |    |
| Koeln-Chorweiler     | 6.884571   | 51.019338 | DENW053      | T              | X              | X               | X  |
| Osnabrueck           | 8.052860   | 52.255340 | DENI038      | BU             | X              | X               | X  |
| Hannover             | 9.706120   | 52.362920 | DENI054      | BU             | X              | X               |    |
| Halle/Nord           | 11.979056  | 51.496185 | DEST050      | BU             | X              | X               | X  |
| Neuruppin            | 12.809481  | 52.931890 | DEBB048      | BU             | X              |                 |    |
| Hof/Berliner_Platz   | 11.897492  | 50.320611 | DEBY020      | BU             | X              | X               |    |
| Leipzig-West         | 12.297411  | 51.317905 | DESN059      | BU             | X              | X               |    |
| Potsdam/Zentrum      | 13.059945  | 52.401352 | DEBB021      | BU             | X              | X               |    |
| Radebeul-Wahnsdorf   | 13.675005  | 51.119514 | DESN051      | BR             | X              |                 |    |
| Schwartenberg        | 13.465.078 | 50.659097 | DESN074      | BR             | X              |                 |    |
| Riedstadt            | 8.516798   | 49.825165 | DEHE043      | BR             | X              | X               |    |
| Soest/Ost            | 8.148023   | 51.570675 | DENW068      | BR             | X              | X               |    |
| Eggenstein           | 8.406660   | 49.076550 | DEBW004      | BR             | X              |                 |    |
| Luette               | 12.561389  | 52.194225 | DEBB065      | BR             | X              |                 |    |
| Spreewald            | 14.057064  | 51.897598 | DEBB066      | BR             | X              |                 |    |
| Kellerwald           | 9.031754   | 51.154843 | DEHE060      | BR             | X              |                 |    |
| Neuhaus              | 11.134593  | 50.499955 | DETH027      | BR             | X              |                 |    |
| Hummelshain          | 11.661233  | 50.791616 | DETH061      | BR             | X              |                 |    |
| Tiefenbach           | 12.548869  | 49.438464 | DEBY072      | BR             | X              | X               |    |
| Possen               | 10.867188  | 51.333333 | DETH042      | BR             | X              |                 |    |
| Witzenhausen/Wald    | 9.774588   | 51.291757 | DEHE024      | BR             | X              |                 |    |
| Carlsfeld            | 12.611125  | 50.431322 | DESN049      | BR             | X              |                 |    |
| Spessart             | 9.399441   | 50.164430 | DEHE026      | BR             | X              |                 |    |
| Simmerath(Eifel)     | 6.281008   | 50.653234 | DENW064      | BR             |                | X               |    |
| Zinnwald             | 13.751450  | 50.731478 | DESN052      | BR             | X              | X               |    |
| Zartau/Waldstation   | 11.172327  | 52.593136 | DEST089      | BR             | X              | X               |    |
| Collmberg            | 13.009406  | 51.303772 | DESN076      | BR             | X              | X               |    |



**Table S3-2:** Summary of min, mean, max, standard deviation (stdv.), correlation (R) and COD values for the measured and modeled O<sub>3</sub>, NO<sub>2</sub> and NO concentrations for the 57, 38 and 14 measurement sites considered.

| O <sub>3</sub> | Measurement sites   | Min           | Mean          | Max            | Stdv.         | R     | COD   |
|----------------|---------------------|---------------|---------------|----------------|---------------|-------|-------|
|                | <b>Spessart</b>     | <b>16.040</b> | <b>76.301</b> | <b>156.718</b> | <b>22.647</b> |       |       |
|                | RACM                | 38.850        | 69.382        | 104.046        | 14.292        | 0.546 | 0.131 |
|                | URMELL              | 25.488        | 69.783        | 105.161        | 15.676        | 0.611 | 0.128 |
|                | <b>Witzenhausen</b> | <b>21.671</b> | <b>75.954</b> | <b>146.570</b> | <b>25.560</b> |       |       |
|                | RACM                | 28.681        | 63.438        | 102.303        | 15.805        | 0.523 | 0.172 |
|                | URMELL              | 22.159        | 64.051        | 103.161        | 16.267        | 0.611 | 0.162 |
|                | <b>Collmburg</b>    | <b>18.44</b>  | <b>74.385</b> | <b>141.386</b> | <b>23.696</b> |       |       |
|                | RACM                | 25.581        | 60.525        | 118.549        | 17.520        | 0.587 | 0.173 |
|                | URMELL              | 25.755        | 61.303        | 121.581        | 17.872        | 0.675 | 0.161 |
|                | <b>Possen</b>       | <b>13.782</b> | <b>74.043</b> | <b>145.719</b> | <b>23.844</b> |       |       |
|                | RACM                | 27.162        | 64.026        | 109.909        | 16.226        | 0.617 | 0.157 |
|                | URMELL              | 23.101        | 64.675        | 111.155        | 16.812        | 0.707 | 0.145 |
|                | <b>Zingst</b>       | <b>24.500</b> | <b>73.455</b> | <b>129.900</b> | <b>19.076</b> |       |       |
|                | RACM                | 38.195        | 73.317        | 113.476        | 15.441        | 0.624 | 0.111 |
|                | URMELL              | 36.362        | 73.471        | 112.224        | 15.797        | 0.563 | 0.121 |
|                | <b>Waldhof</b>      | <b>1.000</b>  | <b>71.421</b> | <b>172.800</b> | <b>29.484</b> |       |       |
|                | RACM                | 25.571        | 64.893        | 121.246        | 17.060        | 0.751 | 0.192 |
|                | URMELL              | 30.865        | 65.676        | 119.001        | 16.788        | 0.736 | 0.196 |
|                | <b>Cottbus</b>      | <b>7.620</b>  | <b>70.487</b> | <b>146.710</b> | <b>26.346</b> |       |       |
|                | RACM                | 30.252        | 66.189        | 117.381        | 17.544        | 0.798 | 0.143 |
|                | URMELL              | 27.151        | 66.069        | 119.188        | 17.721        | 0.781 | 0.148 |
|                | <b>Neuglobow</b>    | <b>3.500</b>  | <b>70.109</b> | <b>139.150</b> | <b>26.678</b> |       |       |
|                | RACM                | 38.675        | 71.158        | 123.702        | 16.330        | 0.694 | 0.195 |
|                | URMELL              | 33.800        | 71.041        | 122.656        | 17.246        | 0.661 | 0.199 |
|                | <b>Hummelshain</b>  | <b>16.810</b> | <b>70.021</b> | <b>154.961</b> | <b>28.263</b> |       |       |
|                | RACM                | 18.398        | 64.340        | 113.213        | 17.115        | 0.754 | 0.152 |
|                | URMELL              | 19.298        | 64.988        | 110.784        | 17.629        | 0.760 | 0.153 |
|                | <b>Radebeul</b>     | <b>18.859</b> | <b>69.829</b> | <b>143.002</b> | <b>23.226</b> |       |       |
|                | RACM                | 18.750        | 59.976        | 121.460        | 19.285        | 0.768 | 0.137 |
|                | URMELL              | 19.323        | 60.241        | 121.923        | 19.281        | 0.798 | 0.129 |
|                | <b>Neuhaus</b>      | <b>17.421</b> | <b>80.922</b> | <b>140.112</b> | <b>22.978</b> |       |       |
|                | RACM                | 40.788        | 72.406        | 98.581         | 11.986        | 0.690 | 0.123 |
|                | URMELL              | 37.793        | 72.412        | 102.057        | 13.474        | 0.715 | 0.121 |
|                | <b>Tiefenbach</b>   | <b>16.450</b> | <b>78.289</b> | <b>131.230</b> | <b>22.658</b> |       |       |
|                | RACM                | 35.307        | 65.966        | 103.504        | 14.132        | 0.544 | 0.156 |
|                | URMELL              | 30.348        | 66.166        | 105.537        | 14.681        | 0.597 | 0.152 |
|                | <b>Carlsfeld</b>    | <b>18.075</b> | <b>77.459</b> | <b>138.612</b> | <b>23.022</b> |       |       |
|                | RACM                | 38.631        | 73.172        | 105.364        | 12.939        | 0.677 | 0.128 |
|                | URMELL              | 36.939        | 72.832        | 107.007        | 14.538        | 0.642 | 0.131 |

| O <sub>3</sub> | Measurement sites         | Min           | Mean          | Max            | Stdv.         | R     | COD   |
|----------------|---------------------------|---------------|---------------|----------------|---------------|-------|-------|
|                | <b>Spreewald</b>          | <b>4.240</b>  | <b>67.440</b> | <b>150.280</b> | <b>27.453</b> |       |       |
|                | RACM                      | 26.479        | 63.739        | 117.613        | 17.831        | 0.800 | 0.167 |
|                | URMELL                    | 26.040        | 64.240        | 117.852        | 17.364        | 0.781 | 0.175 |
|                | <b>Hof</b>                | <b>1.350</b>  | <b>67.056</b> | <b>129.430</b> | <b>27.375</b> |       |       |
|                | RACM                      | 23.673        | 62.562        | 112.095        | 16.571        | 0.760 | 0.217 |
|                | URMELL                    | 26.111        | 63.088        | 112.779        | 16.344        | 0.733 | 0.221 |
|                | <b>Elsterwerda</b>        | <b>2.000</b>  | <b>66.979</b> | <b>148.500</b> | <b>27.124</b> |       |       |
|                | RACM                      | 24.007        | 62.082        | 122.730        | 18.500        | 0.816 | 0.162 |
|                | URMELL                    | 23.391        | 62.191        | 119.800        | 18.615        | 0.783 | 0.174 |
|                | <b>Potsdam</b>            | <b>2.000</b>  | <b>66.763</b> | <b>139.800</b> | <b>25.022</b> |       |       |
|                | RACM                      | 24.177        | 67.083        | 122.376        | 18.677        | 0.818 | 0.152 |
|                | URMELL                    | 27.816        | 67.493        | 123.308        | 18.648        | 0.797 | 0.159 |
|                | <b>Bitterfeld</b>         | <b>6.391</b>  | <b>66.130</b> | <b>148.649</b> | <b>26.433</b> |       |       |
|                | RACM                      | 18.880        | 63.876        | 122.367        | 19.013        | 0.762 | 0.170 |
|                | URMELL                    | 25.691        | 64.393        | 125.517        | 19.309        | 0.762 | 0.172 |
|                | <b>Leipzig-West</b>       | <b>6.942</b>  | <b>66.124</b> | <b>147.611</b> | <b>28.535</b> |       |       |
|                | RACM                      | 8.262         | 60.175        | 120.211        | 21.024        | 0.770 | 0.181 |
|                | URMELL                    | 19.915        | 61.723        | 120.916        | 20.505        | 0.798 | 0.173 |
|                | <b>Kellerwald</b>         | <b>18.054</b> | <b>66.081</b> | <b>127.947</b> | <b>19.595</b> |       |       |
|                | RACM                      | 24.958        | 64.913        | 103.128        | 15.258        | 0.603 | 0.132 |
|                | URMELL                    | 29.665        | 65.910        | 105.030        | 15.463        | 0.692 | 0.120 |
|                | <b>Halle</b>              | <b>5.703</b>  | <b>65.040</b> | <b>160.332</b> | <b>26.547</b> |       |       |
|                | RACM                      | 15.930        | 57.642        | 125.261        | 20.777        | 0.791 | 0.168 |
|                | URMELL                    | 20.331        | 59.148        | 124.936        | 20.251        | 0.824 | 0.156 |
|                | <b>Berlin Marienfelde</b> | <b>0.910</b>  | <b>64.956</b> | <b>142.170</b> | <b>27.711</b> |       |       |
|                | RACM                      | 6.961         | 61.270        | 122.450        | 20.745        | 0.794 | 0.187 |
|                | URMELL                    | 12.473        | 61.802        | 118.289        | 20.952        | 0.790 | 0.196 |
|                | <b>Luetze</b>             | <b>2.000</b>  | <b>63.950</b> | <b>145.860</b> | <b>29.319</b> |       |       |
|                | RACM                      | 31.034        | 65.242        | 112.183        | 16.964        | 0.750 | 0.247 |
|                | URMELL                    | 31.386        | 65.771        | 114.732        | 16.941        | 0.722 | 0.252 |
|                | <b>Mannheim</b>           | <b>1.000</b>  | <b>63.731</b> | <b>165.000</b> | <b>31.411</b> |       |       |
|                | RACM                      | 4.860         | 56.832        | 108.557        | 22.983        | 0.760 | 0.242 |
|                | URMELL                    | 10.196        | 57.719        | 110.845        | 22.991        | 0.729 | 0.253 |
|                | <b>Rostock</b>            | <b>1.000</b>  | <b>62.922</b> | <b>139.750</b> | <b>24.354</b> |       |       |
|                | RACM                      | 29.615        | 68.973        | 111.766        | 16.375        | 0.672 | 0.206 |
|                | URMELL                    | 32.622        | 69.628        | 112.403        | 16.375        | 0.630 | 0.212 |
|                | <b>Riedstadt</b>          | <b>0.599</b>  | <b>62.367</b> | <b>149.961</b> | <b>28.630</b> |       |       |
|                | RACM                      | 3.867         | 55.245        | 111.276        | 21.925        | 0.708 | 0.248 |
|                | URMELL                    | 8.366         | 57.154        | 113.611        | 21.711        | 0.671 | 0.260 |
|                | <b>Hamburg</b>            | <b>1.000</b>  | <b>61.599</b> | <b>146.464</b> | <b>26.680</b> |       |       |
|                | RACM                      | 29.443        | 70.194        | 121.969        | 19.114        | 0.708 | 0.224 |
|                | URMELL                    | 27.932        | 69.948        | 122.466        | 19.131        | 0.677 | 0.227 |

| O <sub>3</sub> | Measurement sites     | Min          | Mean          | Max            | Stdv.         | R     | COD   |
|----------------|-----------------------|--------------|---------------|----------------|---------------|-------|-------|
|                | <b>Berlin Wedding</b> | <b>1.660</b> | <b>61.173</b> | <b>139.290</b> | <b>26.982</b> |       |       |
|                | RACM                  | 0.474        | 59.470        | 130.237        | 22.330        | 0.754 | 0.232 |
|                | URMELL                | 4.591        | 60.065        | 124.438        | 22.040        | 0.760 | 0.228 |
|                | <b>Salzgitter</b>     | <b>1.792</b> | <b>60.874</b> | <b>151.084</b> | <b>26.181</b> |       |       |
|                | RACM                  | 14.480       | 58.585        | 112.999        | 18.339        | 0.770 | 0.183 |
|                | URMELL                | 16.565       | 59.173        | 113.014        | 17.953        | 0.764 | 0.190 |
|                | <b>Hannover</b>       | <b>4.198</b> | <b>60.705</b> | <b>136.226</b> | <b>24.678</b> |       |       |
|                | RACM                  | 8.037        | 61.825        | 123.362        | 19.813        | 0.755 | 0.153 |
|                | URMELL                | 17.128       | 62.018        | 125.135        | 19.650        | 0.763 | 0.158 |
|                | <b>Eggenstein</b>     | <b>1.000</b> | <b>60.702</b> | <b>161.000</b> | <b>32.636</b> |       |       |
|                | RACM                  | 6.592        | 59.533        | 108.903        | 22.568        | 0.804 | 0.250 |
|                | URMELL                | 18.459       | 62.599        | 111.249        | 20.577        | 0.755 | 0.276 |
|                | <b>Erfurt</b>         | <b>2.998</b> | <b>60.695</b> | <b>141.911</b> | <b>26.512</b> |       |       |
|                | RACM                  | 10.980       | 59.932        | 108.662        | 20.003        | 0.752 | 0.182 |
|                | URMELL                | 14.611       | 61.275        | 111.165        | 18.860        | 0.772 | 0.181 |
|                | <b>Niederzier</b>     | <b>0.425</b> | <b>58.671</b> | <b>119.833</b> | <b>25.865</b> |       |       |
|                | RACM                  | 7.141        | 58.749        | 122.138        | 21.210        | 0.768 | 0.219 |
|                | URMELL                | 3.067        | 59.508        | 119.701        | 20.405        | 0.749 | 0.230 |
|                | <b>Wiesbaden</b>      | <b>1.754</b> | <b>58.358</b> | <b>156.734</b> | <b>29.221</b> |       |       |
|                | RACM                  | 7.835        | 57.469        | 107.436        | 20.901        | 0.694 | 0.246 |
|                | URMELL                | 14.185       | 58.537        | 106.404        | 19.590        | 0.698 | 0.248 |
|                | <b>Leuna</b>          | <b>1.260</b> | <b>58.263</b> | <b>148.191</b> | <b>25.878</b> |       |       |
|                | RACM                  | 10.768       | 57.924        | 122.123        | 20.986        | 0.568 | 0.229 |
|                | URMELL                | 20.575       | 59.154        | 123.164        | 20.251        | 0.602 | 0.221 |
|                | <b>Osnabrück</b>      | <b>1.260</b> | <b>58.263</b> | <b>148.191</b> | <b>25.878</b> |       |       |
|                | RACM                  | 16.629       | 56.253        | 125.726        | 18.481        | 0.654 | 0.212 |
|                | URMELL                | 17.133       | 57.683        | 118.986        | 17.892        | 0.693 | 0.211 |
|                | <b>Frankfurt Ost</b>  | <b>2.284</b> | <b>57.614</b> | <b>135.732</b> | <b>27.155</b> |       |       |
|                | RACM                  | 3.613        | 54.569        | 113.609        | 22.248        | 0.754 | 0.203 |
|                | URMELL                | 10.916       | 56.121        | 112.762        | 21.162        | 0.744 | 0.212 |
|                | <b>Neubrandenburg</b> | <b>1.010</b> | <b>57.105</b> | <b>122.550</b> | <b>23.381</b> |       |       |
|                | RACM                  | 23.861       | 63.780        | 114.076        | 18.738        | 0.734 | 0.218 |
|                | URMELL                | 21.652       | 63.993        | 111.968        | 18.714        | 0.711 | 0.222 |
|                | <b>Soest</b>          | <b>0.873</b> | <b>56.551</b> | <b>130.004</b> | <b>26.367</b> |       |       |
|                | RACM                  | 13.281       | 57.788        | 111.260        | 19.007        | 0.798 | 0.219 |
|                | URMELL                | 16.931       | 58.253        | 113.483        | 19.450        | 0.797 | 0.222 |
|                | <b>Trier</b>          | <b>1.502</b> | <b>56.483</b> | <b>157.405</b> | <b>29.979</b> |       |       |
|                | RACM                  | 24.357       | 65.708        | 115.468        | 18.077        | 0.773 | 0.273 |
|                | URMELL                | 21.758       | 66.908        | 115.664        | 18.855        | 0.748 | 0.278 |
|                | <b>Cologne</b>        | <b>0.263</b> | <b>55.599</b> | <b>141.718</b> | <b>29.024</b> |       |       |
|                | RACM                  | 0.551        | 47.593        | 114.010        | 24.193        | 0.715 | 0.277 |
|                | URMELL                | 1.239        | 48.210        | 111.934        | 23.177        | 0.723 | 0.275 |

| O <sub>3</sub> | Measurement sites        | Min           | Mean          | Max            | Stdv.         | R     | COD   |
|----------------|--------------------------|---------------|---------------|----------------|---------------|-------|-------|
|                | <b>Karlsruhe</b>         | <b>1.000</b>  | <b>69.406</b> | <b>168.000</b> | <b>30.541</b> |       |       |
|                | RACM                     | 6.592         | 59.533        | 108.903        | 22.568        | 0.760 | 0.181 |
|                | URMELL                   | 18.459        | 62.599        | 111.249        | 20.577        | 0.756 | 0.186 |
|                | <b>Zartau</b>            | <b>3.979</b>  | <b>68.471</b> | <b>157.522</b> | <b>27.914</b> |       |       |
|                | RACM                     | 29.925        | 64.023        | 117.464        | 17.216        | 0.756 | 0.179 |
|                | URMELL                   | 32.354        | 64.641        | 118.283        | 17.317        | 0.742 | 0.186 |
|                | <b>Schwedt</b>           | <b>8.170</b>  | <b>68.285</b> | <b>152.630</b> | <b>25.554</b> |       |       |
|                | RACM                     | 29.555        | 65.713        | 113.991        | 17.284        | 0.774 | 0.154 |
|                | URMELL                   | 25.739        | 66.178        | 115.249        | 17.378        | 0.721 | 0.164 |
|                | <b>Eisenhuettenstadt</b> | <b>9.960</b>  | <b>68.163</b> | <b>136.060</b> | <b>25.193</b> |       |       |
|                | RACM                     | 28.826        | 64.291        | 115.084        | 17.198        | 0.768 | 0.156 |
|                | URMELL                   | 26.951        | 65.668        | 114.354        | 17.269        | 0.699 | 0.169 |
|                | <b>Frankfurt Hoechst</b> | <b>1.197</b>  | <b>53.947</b> | <b>144.518</b> | <b>26.614</b> |       |       |
|                | RACM                     | 5.135         | 54.333        | 106.777        | 21.795        | 0.721 | 0.223 |
|                | URMELL                   | 7.519         | 55.013        | 104.133        | 20.899        | 0.710 | 0.235 |
|                | <b>Koblenz</b>           | <b>0.998</b>  | <b>49.991</b> | <b>133.019</b> | <b>27.247</b> |       |       |
|                | RACM                     | 5.712         | 57.963        | 116.734        | 21.746        | 0.703 | 0.268 |
|                | URMELL                   | 6.963         | 59.198        | 117.651        | 21.424        | 0.727 | 0.267 |
|                | <b>Duisburg</b>          | <b>0.494</b>  | <b>49.372</b> | <b>133.737</b> | <b>24.802</b> |       |       |
|                | RACM                     | 3.310         | 54.189        | 124.886        | 22.020        | 0.677 | 0.267 |
|                | URMELL                   | 2.573         | 53.718        | 120.418        | 21.632        | 0.671 | 0.269 |
|                | <b>Bottrop</b>           | <b>0.049</b>  | <b>48.798</b> | <b>147.440</b> | <b>28.085</b> |       |       |
|                | RACM                     | 1.779         | 51.328        | 122.474        | 23.246        | 0.709 | 0.283 |
|                | URMELL                   | 1.480         | 51.447        | 113.800        | 22.526        | 0.714 | 0.286 |
|                | <b>Neuruppin</b>         | <b>8.510</b>  | <b>67.739</b> | <b>167.010</b> | <b>26.175</b> |       |       |
|                | RACM                     | 29.127        | 66.324        | 125.873        | 18.466        | 0.791 | 0.145 |
|                | URMELL                   | 26.401        | 66.691        | 125.460        | 18.752        | 0.769 | 0.153 |
|                | <b>Saarbruecken</b>      | <b>1.240</b>  | <b>47.185</b> | <b>120.830</b> | <b>25.213</b> |       |       |
|                | RACM                     | 26.465        | 66.936        | 110.359        | 17.229        | 0.725 | 0.351 |
|                | URMELL                   | 25.064        | 68.935        | 112.391        | 17.324        | 0.662 | 0.362 |
|                | <b>Westerland</b>        | <b>36.450</b> | <b>87.524</b> | <b>133.600</b> | <b>15.685</b> |       |       |
|                | RACM                     | 35.862        | 80.094        | 127.450        | 15.686        | 0.542 | 0.100 |
|                | URMELL                   | 40.206        | 79.132        | 128.367        | 16.572        | 0.525 | 0.108 |
|                | <b>Schmuecke</b>         | <b>18.650</b> | <b>85.412</b> | <b>154.200</b> | <b>25.521</b> |       |       |
|                | RACM                     | 35.210        | 72.234        | 101.708        | 12.734        | 0.656 | 0.139 |
|                | URMELL                   | 33.119        | 72.107        | 102.843        | 14.005        | 0.682 | 0.139 |
|                | <b>Zinnwald</b>          | <b>24.602</b> | <b>83.937</b> | <b>149.427</b> | <b>21.878</b> |       |       |
|                | RACM                     | 31.618        | 67.214        | 110.621        | 14.017        | 0.697 | 0.146 |
|                | URMELL                   | 31.718        | 66.957        | 109.386        | 15.022        | 0.702 | 0.149 |
|                | <b>Schwartenberg</b>     | <b>25.320</b> | <b>83.705</b> | <b>151.362</b> | <b>23.081</b> |       |       |
|                | RACM                     | 33.327        | 67.636        | 108.278        | 14.113        | 0.723 | 0.143 |
|                | URMELL                   | 28.729        | 67.038        | 111.661        | 15.878        | 0.736 | 0.146 |

| O <sub>3</sub>  | Measurement sites   | Min          | Mean          | Max            | Stdv.         | R     | COD   |
|-----------------|---------------------|--------------|---------------|----------------|---------------|-------|-------|
|                 | <b>Bremen</b>       | <b>2.260</b> | <b>60.533</b> | <b>137.050</b> | <b>23.827</b> |       |       |
|                 | RACM                | 27.392       | 68.426        | 119.779        | 17.258        | 0.668 | 0.197 |
|                 | URMELL              | 25.456       | 68.047        | 122.042        | 17.637        | 0.672 | 0.199 |
| NO <sub>2</sub> | <b>Tiefenbach</b>   | <b>2.820</b> | <b>6.282</b>  | <b>15.920</b>  | <b>1.842</b>  |       |       |
|                 | RACM                | 0.241        | 2.322         | 7.470          | 1.152         | 0.399 | 0.508 |
|                 | URMELL              | 0.374        | 2.469         | 7.305          | 1.264         | 0.336 | 0.492 |
|                 | <b>Collmberg</b>    | <b>1.183</b> | <b>5.673</b>  | <b>22.433</b>  | <b>3.021</b>  |       |       |
|                 | RACM                | 0.642        | 3.819         | 11.324         | 1.860         | 0.600 | 0.274 |
|                 | URMELL              | 0.634        | 3.766         | 11.313         | 1.844         | 0.601 | 0.275 |
|                 | <b>Zingst</b>       | <b>0.100</b> | <b>4.947</b>  | <b>37.020</b>  | <b>4.917</b>  |       |       |
|                 | RACM                | 0.384        | 4.180         | 27.158         | 3.319         | 0.599 | 0.296 |
|                 | URMELL              | 0.371        | 4.105         | 24.053         | 3.073         | 0.534 | 0.311 |
|                 | <b>Waldhof</b>      | <b>0.370</b> | <b>4.013</b>  | <b>17.800</b>  | <b>3.097</b>  |       |       |
|                 | RACM                | 0.366        | 2.799         | 9.379          | 1.659         | 0.627 | 0.249 |
|                 | URMELL              | 0.413        | 2.850         | 10.592         | 1.778         | 0.606 | 0.253 |
|                 | <b>Simmerath</b>    | <b>0.066</b> | <b>5.685</b>  | <b>35.267</b>  | <b>4.664</b>  |       |       |
|                 | RACM                | 0.366        | 5.583         | 35.995         | 5.392         | 0.566 | 0.344 |
|                 | URMELL              | 0.518        | 5.900         | 38.047         | 5.713         | 0.548 | 0.346 |
|                 | <b>Neuglobsow</b>   | <b>0.100</b> | <b>2.113</b>  | <b>11.300</b>  | <b>1.592</b>  |       |       |
|                 | RACM                | 0.311        | 2.382         | 7.679          | 1.490         | 0.671 | 0.251 |
|                 | URMELL              | 0.346        | 2.453         | 7.532          | 1.580         | 0.679 | 0.253 |
|                 | <b>Karlsruhe</b>    | <b>0.000</b> | <b>13.750</b> | <b>69.000</b>  | <b>11.760</b> |       |       |
|                 | RACM                | 2.147        | 10.880        | 47.274         | 6.601         | 0.774 | 0.272 |
|                 | URMELL              | 2.136        | 10.013        | 31.165         | 5.210         | 0.650 | 0.295 |
|                 | <b>Zartau</b>       | <b>0.331</b> | <b>3.906</b>  | <b>17.900</b>  | <b>2.515</b>  |       |       |
|                 | RACM                | 0.437        | 3.073         | 9.276          | 1.814         | 0.665 | 0.238 |
|                 | URMELL              | 0.476        | 3.054         | 10.067         | 1.855         | 0.643 | 0.241 |
|                 | <b>Hof</b>          | <b>1.950</b> | <b>11.813</b> | <b>53.410</b>  | <b>7.990</b>  |       |       |
|                 | RACM                | 1.111        | 4.696         | 21.396         | 2.685         | 0.491 | 0.451 |
|                 | URMELL              | 1.200        | 4.500         | 13.362         | 2.137         | 0.423 | 0.458 |
|                 | <b>Elsterwerda</b>  | <b>1.910</b> | <b>9.914</b>  | <b>40.810</b>  | <b>5.381</b>  |       |       |
|                 | RACM                | 0.598        | 3.684         | 8.794          | 1.771         | 0.599 | 0.479 |
|                 | URMELL              | 0.609        | 3.698         | 9.205          | 1.769         | 0.571 | 0.476 |
|                 | <b>Potsdam</b>      | <b>4.560</b> | <b>13.962</b> | <b>57.800</b>  | <b>7.951</b>  |       |       |
|                 | RACM                | 1.159        | 7.807         | 71.446         | 7.027         | 0.556 | 0.411 |
|                 | URMELL              | 1.118        | 7.234         | 43.982         | 5.220         | 0.527 | 0.415 |
|                 | <b>Bitterfeld</b>   | <b>1.397</b> | <b>8.918</b>  | <b>47.312</b>  | <b>5.993</b>  |       |       |
|                 | RACM                | 1.231        | 5.031         | 18.164         | 2.698         | 0.422 | 0.345 |
|                 | URMELL              | 1.232        | 5.107         | 15.252         | 2.666         | 0.415 | 0.340 |
|                 | <b>Leipzig-West</b> | <b>2.985</b> | <b>11.622</b> | <b>61.448</b>  | <b>6.911</b>  |       |       |
|                 | RACM                | 1.661        | 8.608         | 39.601         | 5.860         | 0.521 | 0.283 |
|                 | URMELL              | 1.626        | 7.880         | 26.050         | 4.432         | 0.611 | 0.278 |

| NO <sub>2</sub> | Measurement sites        | Min          | Mean          | Max            | Stdv.         | R     | COD   |
|-----------------|--------------------------|--------------|---------------|----------------|---------------|-------|-------|
|                 | <b>Salzgitter</b>        | <b>3.174</b> | <b>11.285</b> | <b>40.350</b>  | <b>5.441</b>  |       |       |
|                 | RACM                     | 3.000        | 8.466         | 43.679         | 4.492         | 0.255 | 0.261 |
|                 | URMELL                   | 3.136        | 8.244         | 34.341         | 3.966         | 0.240 | 0.265 |
|                 | <b>Hannover</b>          | <b>4.500</b> | <b>16.344</b> | <b>58.293</b>  | <b>8.648</b>  |       |       |
|                 | RACM                     | 2.376        | 11.891        | 61.038         | 7.799         | 0.485 | 0.300 |
|                 | URMELL                   | 2.384        | 11.500        | 50.883         | 7.112         | 0.499 | 0.300 |
|                 | <b>Erfurt</b>            | <b>1.913</b> | <b>16.080</b> | <b>66.659</b>  | <b>10.184</b> |       |       |
|                 | RACM                     | 1.114        | 6.030         | 34.720         | 4.245         | 0.496 | 0.496 |
|                 | URMELL                   | 1.131        | 5.707         | 19.458         | 3.254         | 0.515 | 0.499 |
|                 | <b>Wiesbaden</b>         | <b>3.442</b> | <b>23.711</b> | <b>93.624</b>  | <b>17.319</b> |       |       |
|                 | RACM                     | 1.906        | 14.102        | 59.505         | 9.928         | 0.645 | 0.342 |
|                 | URMELL                   | 1.974        | 13.718        | 45.600         | 8.972         | 0.657 | 0.342 |
|                 | <b>Leuna</b>             | <b>4.002</b> | <b>15.586</b> | <b>58.761</b>  | <b>8.689</b>  |       |       |
|                 | RACM                     | 1.356        | 7.085         | 29.791         | 4.278         | 0.407 | 0.424 |
|                 | URMELL                   | 1.262        | 6.676         | 19.541         | 3.135         | 0.470 | 0.424 |
|                 | <b>Osnabrück</b>         | <b>4.002</b> | <b>15.586</b> | <b>58.761</b>  | <b>8.689</b>  |       |       |
|                 | RACM                     | 2.265        | 9.732         | 34.418         | 5.034         | 0.505 | 0.304 |
|                 | URMELL                   | 2.271        | 9.169         | 22.911         | 4.222         | 0.498 | 0.312 |
|                 | <b>Frankfurt Ost</b>     | <b>1.559</b> | <b>27.945</b> | <b>105.470</b> | <b>19.542</b> |       |       |
|                 | RACM                     | 1.639        | 15.511        | 71.357         | 11.314        | 0.592 | 0.367 |
|                 | URMELL                   | 1.764        | 14.549        | 51.427         | 9.603         | 0.598 | 0.374 |
|                 | <b>Neubrandenburg</b>    | <b>4.500</b> | <b>18.543</b> | <b>59.500</b>  | <b>10.236</b> |       |       |
|                 | RACM                     | 0.611        | 3.447         | 11.178         | 2.027         | 0.364 | 0.682 |
|                 | URMELL                   | 0.605        | 3.386         | 8.876          | 1.852         | 0.349 | 0.683 |
|                 | <b>Soest</b>             | <b>0.021</b> | <b>10.188</b> | <b>53.412</b>  | <b>8.184</b>  |       |       |
|                 | RACM                     | 1.301        | 6.809         | 23.178         | 3.837         | 0.329 | 0.360 |
|                 | URMELL                   | 1.460        | 6.928         | 23.178         | 3.837         | 0.340 | 0.357 |
|                 | <b>Trier</b>             | <b>2.429</b> | <b>14.949</b> | <b>61.404</b>  | <b>9.600</b>  |       |       |
|                 | RACM                     | 1.294        | 7.285         | 23.401         | 4.123         | 0.491 | 0.379 |
|                 | URMELL                   | 1.406        | 7.285         | 23.401         | 4.123         | 0.505 | 0.382 |
|                 | <b>Cologne</b>           | <b>0.546</b> | <b>20.289</b> | <b>91.004</b>  | <b>14.404</b> |       |       |
|                 | RACM                     | 5.061        | 25.451        | 86.674         | 13.843        | 0.388 | 0.343 |
|                 | URMELL                   | 5.273        | 24.256        | 82.916         | 12.414        | 0.391 | 0.335 |
|                 | <b>Frankfurt Hoechst</b> | <b>4.539</b> | <b>35.548</b> | <b>103.086</b> | <b>16.042</b> |       |       |
|                 | RACM                     | 2.409        | 18.319        | 82.992         | 13.809        | 0.618 | 0.427 |
|                 | URMELL                   | 2.495        | 17.800        | 65.017         | 12.479        | 0.623 | 0.431 |
|                 | <b>Koblenz</b>           | <b>3.969</b> | <b>33.559</b> | <b>80.567</b>  | <b>15.190</b> |       |       |
|                 | RACM                     | 2.097        | 14.596        | 49.360         | 9.595         | 0.380 | 0.465 |
|                 | URMELL                   | 2.194        | 13.9923       | 42.196         | 8.789         | 0.431 | 0.469 |
|                 | <b>Duisburg</b>          | <b>0.029</b> | <b>21.562</b> | <b>87.724</b>  | <b>15.891</b> |       |       |
|                 | RACM                     | 2.094        | 19.427        | 54.651         | 9.962         | 0.556 | 0.303 |
|                 | URMELL                   | 2.071        | 19.393        | 56.011         | 10.167        | 0.555 | 0.302 |

| NO <sub>2</sub> | Measurement sites         | Min          | Mean          | Max            | Stdv.         | R     | COD   |
|-----------------|---------------------------|--------------|---------------|----------------|---------------|-------|-------|
|                 | <b>Berlin Marienfelde</b> | <b>1.550</b> | <b>10.158</b> | <b>63.140</b>  | <b>7.348</b>  |       |       |
|                 | RACM                      | 2.320        | 12.807        | 92.863         | 9.810         | 0.511 | 0.267 |
|                 | URMELL                    | 2.490        | 12.074        | 48.192         | 8.272         | 0.420 | 0.267 |
|                 | <b>Mannheim</b>           | <b>1.000</b> | <b>20.327</b> | <b>94.000</b>  | <b>15.496</b> |       |       |
|                 | RACM                      | 1.959        | 13.530        | 46.508         | 8.953         | 0.493 | 0.319 |
|                 | URMELL                    | 2.093        | 13.942        | 54.479         | 9.709         | 0.465 | 0.322 |
|                 | <b>Rostock</b>            | <b>0.900</b> | <b>12.241</b> | <b>65.100</b>  | <b>11.407</b> |       |       |
|                 | RACM                      | 0.805        | 4.920         | 28.057         | 3.266         | 0.252 | 0.469 |
|                 | URMELL                    | 0.852        | 4.800         | 25.992         | 2.933         | 0.208 | 0.474 |
|                 | <b>Berlin Wedding</b>     | <b>3.850</b> | <b>22.217</b> | <b>113.780</b> | <b>16.423</b> |       |       |
|                 | RACM                      | 2.740        | 17.629        | 90.424         | 14.263        | 0.603 | 0.277 |
|                 | URMELL                    | 2.863        | 16.528        | 63.840         | 11.864        | 0.577 | 0.288 |
|                 | <b>Bottrop</b>            | <b>0.036</b> | <b>22.389</b> | <b>61.925</b>  | <b>12.718</b> |       |       |
|                 | RACM                      | 5.689        | 23.343        | 60.730         | 10.886        | 0.459 | 0.279 |
|                 | URMELL                    | 5.889        | 22.832        | 67.019         | 10.507        | 0.474 | 0.276 |
|                 | <b>Cottbus</b>            | <b>1.910</b> | <b>9.711</b>  | <b>48.890</b>  | <b>5.786</b>  |       |       |
|                 | RACM                      | 1.061        | 4.547         | 15.628         | 2.243         | 0.358 | 0.409 |
|                 | URMELL                    | 1.089        | 4.525         | 19.013         | 2.165         | 0.341 | 0.407 |
|                 | <b>Saarbruecken</b>       | <b>4.230</b> | <b>37.230</b> | <b>107.110</b> | <b>18.084</b> |       |       |
|                 | RACM                      | 0.677        | 4.752         | 18.697         | 2.806         | 0.156 | 0.757 |
|                 | URMELL                    | 0.667        | 4.686         | 18.508         | 2.750         | 0.087 | 0.759 |
|                 | <b>Riedstadt</b>          | <b>0.574</b> | <b>11.378</b> | <b>46.508</b>  | <b>7.985</b>  |       |       |
|                 | RACM                      | 2.767        | 14.152        | 70.870         | 9.148         | 0.431 | 0.300 |
|                 | URMELL                    | 2.775        | 13.471        | 50.572         | 8.064         | 0.418 | 0.294 |
|                 | <b>Westerland</b>         | <b>0.100</b> | <b>3.743</b>  | <b>41.700</b>  | <b>4.428</b>  |       |       |
|                 | RACM                      | 0.149        | 2.921         | 13.241         | 2.030         | 0.330 | 0.354 |
|                 | URMELL                    | 0.149        | 3.072         | 14.836         | 2.213         | 0.319 | 0.362 |
|                 | <b>Schmuecke</b>          | <b>0.310</b> | <b>2.548</b>  | <b>7.700</b>   | <b>1.492</b>  |       |       |
|                 | RACM                      | 0.741        | 2.861         | 8.298          | 1.431         | 0.271 | 0.289 |
|                 | URMELL                    | 0.803        | 2.923         | 8.679          | 1.456         | 0.323 | 0.285 |
|                 | <b>Zinnwald</b>           | <b>1.310</b> | <b>5.456</b>  | <b>30.294</b>  | <b>3.401</b>  |       |       |
|                 | RACM                      | 0.420        | 2.841         | 14.668         | 1.972         | 0.697 | 0.146 |
|                 | URMELL                    | 0.455        | 3.098         | 12.595         | 2.067         | 0.702 | 0.149 |
|                 | <b>Bremen</b>             | <b>1.900</b> | <b>14.266</b> | <b>71.560</b>  | <b>9.801</b>  |       |       |
|                 | RACM                      | 1.708        | 5.735         | 24.791         | 2.847         | 0.068 | 0.448 |
|                 | URMELL                    | 1.681        | 5.841         | 26.687         | 2.823         | 0.054 | 0.445 |
|                 | <b>Halle</b>              | <b>0.022</b> | <b>10.336</b> | <b>58.510</b>  | <b>10.168</b> |       |       |
|                 | RACM                      | 1.303        | 6.234         | 19.982         | 3.625         | 0.588 | 0.362 |
|                 | URMELL                    | 1.339        | 5.958         | 17.047         | 3.157         | 0.597 | 0.366 |

| NO | Measurement sites        | Min          | Mean          | Max            | Stdv.         | R     | COD   |
|----|--------------------------|--------------|---------------|----------------|---------------|-------|-------|
|    | <b>Halle</b>             | <b>0.282</b> | <b>1.560</b>  | <b>22.539</b>  | <b>2.279</b>  |       |       |
|    | RACM                     | 0.061        | 0.832         | 6.402          | 0.899         | 0.627 | 0.404 |
|    | URMELL                   | 0.057        | 0.862         | 6.202          | 0.957         | 0.637 | 0.423 |
|    | <b>Mannheim</b>          | <b>0.000</b> | <b>3.023</b>  | <b>54.000</b>  | <b>6.684</b>  |       |       |
|    | RACM                     | 0.047        | 2.048         | 25.085         | 73.609        | 0.487 | 0.745 |
|    | URMELL                   | 0.049        | 2.075         | 27.501         | 3.655         | 0.437 | 0.750 |
|    | <b>Berlin Wedding</b>    | <b>0.100</b> | <b>3.572</b>  | <b>78.470</b>  | <b>7.220</b>  |       |       |
|    | RACM                     | 0.227        | 3.013         | 47.609         | 4.474         | 0.546 | 0.436 |
|    | URMELL                   | 0.228        | 3.114         | 38.686         | 4.501         | 0.416 | 0.441 |
|    | <b>Osnabrück</b>         | <b>0.092</b> | <b>1.608</b>  | <b>58.241</b>  | <b>4.465</b>  |       |       |
|    | RACM                     | 0.162        | 1.587         | 9.809          | 1.387         | 0.435 | 0.426 |
|    | URMELL                   | 0.163        | 1.613         | 8.668          | 1.417         | 0.416 | 0.430 |
|    | <b>Frankfurt Ost</b>     | <b>0.374</b> | <b>7.097</b>  | <b>70.733</b>  | <b>10.413</b> |       |       |
|    | RACM                     | 0.137        | 2.536         | 42.600         | 3.740         | 0.644 | 0.537 |
|    | URMELL                   | 0.139        | 2.548         | 26.436         | 3.514         | 0.635 | 0.548 |
|    | <b>Cologne</b>           | <b>0.003</b> | <b>3.970</b>  | <b>70.071</b>  | <b>6.341</b>  |       |       |
|    | RACM                     | 0.249        | 5.872         | 85.201         | 7.874         | 0.424 | 0.459 |
|    | URMELL                   | 0.243        | 5.624         | 51.345         | 6.731         | 0.394 | 0.462 |
|    | <b>Frankfurt Hoechst</b> | <b>0.374</b> | <b>13.429</b> | <b>100.809</b> | <b>11.665</b> |       |       |
|    | RACM                     | 0.173        | 3.288         | 41.325         | 4.402         | 0.572 | 0.672 |
|    | URMELL                   | 0.192        | 3.447         | 34.463         | 4.609         | 0.542 | 0.678 |
|    | <b>Saarbruecken</b>      | <b>0.350</b> | <b>26.399</b> | <b>184.550</b> | <b>25.373</b> |       |       |
|    | RACM                     | 0.004        | 0.381         | 3.649          | 0.518         | 0.439 | 0.967 |
|    | URMELL                   | 0.004        | 0.403         | 3.393          | 0.553         | 0.427 | 0.966 |
|    | <b>Westerland</b>        | <b>0.060</b> | <b>0.600</b>  | <b>37.820</b>  | <b>2.294</b>  |       |       |
|    | RACM                     | 0.002        | 0.257         | 2.045          | 0.365         | 0.109 | 0.619 |
|    | URMELL                   | 0.002        | 0.279         | 2.279          | 0.405         | 0.110 | 0.621 |
|    | <b>Schmuecke</b>         | <b>0.050</b> | <b>0.328</b>  | <b>2.850</b>   | <b>0.405</b>  |       |       |
|    | RACM                     | 0.012        | 0.305         | 1.731          | 0.320         | 0.604 | 0.331 |
|    | URMELL                   | 0.011        | 0.326         | 1.867          | 0.355         | 0.567 | 0.343 |
|    | <b>Zingst</b>            | <b>0.040</b> | <b>0.502</b>  | <b>19.260</b>  | <b>1.131</b>  |       |       |
|    | RACM                     | 0.003        | 0.401         | 3.603          | 0.555         | 0.555 | 0.532 |
|    | URMELL                   | 0.003        | 0.434         | 3.767          | 0.591         | 0.529 | 0.553 |
|    | <b>Waldhof</b>           | <b>0.130</b> | <b>0.443</b>  | <b>4.650</b>   | <b>0.539</b>  |       |       |
|    | RACM                     | 0.010        | 0.273         | 2.137          | 0.364         | 0.636 | 0.492 |
|    | URMELL                   | 0.009        | 0.293         | 2.297          | 0.403         | 0.607 | 0.510 |
|    | <b>Karlsruhe</b>         | <b>0.000</b> | <b>1.641</b>  | <b>62.000</b>  | <b>5.431</b>  |       |       |
|    | RACM                     | 0.052        | 1.326         | 17.899         | 1.922         | 0.759 | 0.776 |
|    | URMELL                   | 0.050        | 1.246         | 10.179         | 1.523         | 0.472 | 0.784 |
|    | <b>Leuna</b>             | <b>0.092</b> | <b>1.608</b>  | <b>58.241</b>  | <b>4.465</b>  |       |       |
|    | RACM                     | 0.104        | 0.895         | 6.046          | 0.895         | 0.407 | 0.360 |
|    | URMELL                   | 0.110        | 0.931         | 5.222          | 0.939         | 0.428 | 0.367 |



**Table S3-3:** R and COD values for the mean diurnal O<sub>3</sub>, NO<sub>2</sub> and NO cycles for May 2014 between measured and modeled values using RACM and URMELL.

| Measurement sites   | O <sub>3</sub> |       | NO <sub>2</sub> |       | NO    |       |
|---------------------|----------------|-------|-----------------|-------|-------|-------|
|                     | R              | COD   | R               | COD   | R     | COD   |
| <b>Neuhaus</b>      |                |       |                 |       |       |       |
| RACM                | 0.951          | 0.061 |                 |       |       |       |
| URMELL              | 0.950          | 0.062 |                 |       |       |       |
| <b>Tiefenbach</b>   |                |       |                 |       |       |       |
| RACM                | 0.803          | 0.099 | 0.764           | 0.493 |       |       |
| URMELL              | 0.861          | 0.094 | 0.729           | 0.468 |       |       |
| <b>Carlsfeld</b>    |                |       |                 |       |       |       |
| RACM                | 0.893          | 0.038 |                 |       |       |       |
| URMELL              | 0.794          | 0.042 |                 |       |       |       |
| <b>Spessart</b>     |                |       |                 |       |       |       |
| RACM                | 0.959          | 0.052 |                 |       |       |       |
| URMELL              | 0.964          | 0.049 |                 |       |       |       |
| <b>Witzenhausen</b> |                |       |                 |       |       |       |
| RACM                | 0.769          | 0.109 |                 |       |       |       |
| URMELL              | 0.834          | 0.100 |                 |       |       |       |
| <b>Possen</b>       |                |       |                 |       |       |       |
| RACM                | 0.933          | 0.086 |                 |       |       |       |
| URMELL              | 0.970          | 0.077 |                 |       |       |       |
| <b>Zingst</b>       |                |       |                 |       |       |       |
| RACM                | 0.968          | 0.017 | 0.597           | 0.139 | 0.910 | 0.477 |
| URMELL              | 0.926          | 0.026 | 0.498           | 0.152 | 0.914 | 0.489 |
| <b>Waldhof</b>      |                |       |                 |       |       |       |
| RACM                | 0.989          | 0.053 | 0.948           | 0.177 | 0.937 | 0.492 |
| URMELL              | 0.983          | 0.054 | 0.939           | 0.168 | 0.918 | 0.507 |
| <b>Collmberg</b>    |                |       |                 |       |       |       |
| RACM                | 0.804          | 0.125 | 0.876           | 0.221 |       |       |
| URMELL              | 0.868          | 0.114 | 0.900           | 0.223 |       |       |
| <b>Simmerath</b>    |                |       |                 |       |       |       |
| RACM                |                |       | 0.697           | 0.127 |       |       |
| URMELL              |                |       | 0.691           | 0.120 |       |       |
| <b>Cottbus</b>      |                |       |                 |       |       |       |
| RACM                | 0.992          | 0.039 | 0.763           | 0.357 |       |       |
| URMELL              | 0.981          | 0.043 | 0.716           | 0.368 |       |       |
| <b>Neuglobsow</b>   |                |       |                 |       |       |       |
| RACM                | 0.949          | 0.047 | 0.944           | 0.093 |       |       |
| URMELL              | 0.929          | 0.049 | 0.944           | 0.094 |       |       |
| <b>Hummelshain</b>  |                |       |                 |       |       |       |
| RACM                | 0.985          | 0.045 |                 |       |       |       |
| URMELL              | 0.977          | 0.045 |                 |       |       |       |

| Measurement sites         | O <sub>3</sub> |       | NO <sub>2</sub> |       | NO    |       |
|---------------------------|----------------|-------|-----------------|-------|-------|-------|
|                           | R              | COD   | R               | COD   | R     | COD   |
| <b>Eisenhuettenstadt</b>  |                |       |                 |       |       |       |
| RACM                      | 0.983          | 0.037 |                 |       |       |       |
| URMELL                    | 0.969          | 0.040 |                 |       |       |       |
| <b>Neuruppin</b>          |                |       |                 |       |       |       |
| RACM                      | 0.991          | 0.018 |                 |       |       |       |
| URMELL                    | 0.982          | 0.022 |                 |       |       |       |
| <b>Hof</b>                |                |       |                 |       |       |       |
| RACM                      | 0.919          | 0.060 | 0.911           | 0.453 |       |       |
| URMELL                    | 0.948          | 0.055 | 0.948           | 0.461 |       |       |
| <b>Spreewald</b>          |                |       |                 |       |       |       |
| RACM                      | 0.986          | 0.044 |                 |       |       |       |
| URMELL                    | 0.970          | 0.051 |                 |       |       |       |
| <b>Elsterwerda</b>        |                |       |                 |       |       |       |
| RACM                      | 0.985          | 0.045 | 0.899           | 0.478 |       |       |
| URMELL                    | 0.987          | 0.046 | 0.931           | 0.462 |       |       |
| <b>Potsdam</b>            |                |       |                 |       |       |       |
| RACM                      | 0.983          | 0.020 | 0.772           | 0.350 |       |       |
| URMELL                    | 0.988          | 0.019 | 0.856           | 0.365 |       |       |
| <b>Bitterfeld</b>         |                |       |                 |       |       |       |
| RACM                      | 0.991          | 0.024 | 0.822           | 0.304 |       |       |
| URMELL                    | 0.978          | 0.031 | 0.837           | 0.297 |       |       |
| <b>Leipzig-West</b>       |                |       |                 |       |       |       |
| RACM                      | 0.963          | 0.060 | 0.683           | 0.217 |       |       |
| URMELL                    | 0.987          | 0.040 | 0.817           | 0.229 |       |       |
| <b>Kellerwald</b>         |                |       |                 |       |       |       |
| RACM                      | 0.962          | 0.037 |                 |       |       |       |
| URMELL                    | 0.963          | 0.027 |                 |       |       |       |
| <b>Halle</b>              |                |       |                 |       |       |       |
| RACM                      | 0.973          | 0.073 | 0.897           | 0.262 | 0.964 | 0.400 |
| URMELL                    | 0.993          | 0.052 | 0.954           | 0.273 | 0.965 | 0.427 |
| <b>Berlin Marienfelde</b> |                |       |                 |       |       |       |
| RACM                      | 0.958          | 0.048 | 0.651           | 0.184 |       |       |
| URMELL                    | 0.959          | 0.047 | 0.634           | 0.175 |       |       |
| <b>Luette</b>             |                |       |                 |       |       |       |
| RACM                      | 0.977          | 0.054 |                 |       |       |       |
| URMELL                    | 0.948          | 0.065 |                 |       |       |       |
| <b>Mannheim</b>           |                |       |                 |       |       |       |
| RACM                      | 0.985          | 0.057 | 0.901           | 0.205 | 0.740 | 0.541 |
| URMELL                    | 0.981          | 0.055 | 0.896           | 0.191 | 0.730 | 0.553 |
| <b>Rostock</b>            |                |       |                 |       |       |       |
| RACM                      | 0.970          | 0.067 | 0.589           | 0.427 |       |       |
| URMELL                    | 0.940          | 0.076 | 0.380           | 0.437 |       |       |

| Measurement sites        | O <sub>3</sub> |       | NO <sub>2</sub> |       | NO    |       |
|--------------------------|----------------|-------|-----------------|-------|-------|-------|
|                          | R              | COD   | R               | COD   | R     | COD   |
| <b>Salzgitter</b>        |                |       |                 |       |       |       |
| RACM                     | 0.977          | 0.038 | 0.616           | 0.176 |       |       |
| URMELL                   | 0.983          | 0.039 | 0.556           | 0.184 |       |       |
| <b>Hannover</b>          |                |       |                 |       |       |       |
| RACM                     | 0.973          | 0.030 | 0.920           | 0.220 |       |       |
| URMELL                   | 0.982          | 0.027 | 0.917           | 0.228 |       |       |
| <b>Eggenstein</b>        |                |       |                 |       |       |       |
| RACM                     | 0.994          | 0.063 |                 |       |       |       |
| URMELL                   | 0.970          | 0.101 |                 |       |       |       |
| <b>Erfurt</b>            |                |       |                 |       |       |       |
| RACM                     | 0.929          | 0.051 | 0.626           | 0.493 |       |       |
| URMELL                   | 0.966          | 0.038 | 0.716           | 0.498 |       |       |
| <b>Niederzier</b>        |                |       |                 |       |       |       |
| RACM                     | 0.958          | 0.052 |                 |       |       |       |
| URMELL                   | 0.972          | 0.055 |                 |       |       |       |
| <b>Wiesbaden</b>         |                |       |                 |       |       |       |
| RACM                     | 0.954          | 0.060 | 0.944           | 0.268 |       |       |
| URMELL                   | 0.963          | 0.061 | 0.936           | 0.275 |       |       |
| <b>Leuna</b>             |                |       |                 |       |       |       |
| RACM                     | 0.930          | 0.054 | 0.731           | 0.400 | 0.786 | 0.302 |
| URMELL                   | 0.964          | 0.036 | 0.830           | 0.401 | 0.737 | 0.335 |
| <b>Osnabrück</b>         |                |       |                 |       |       |       |
| RACM                     | 0.928          | 0.048 | 0.821           | 0.258 | 0.822 | 0.287 |
| URMELL                   | 0.952          | 0.039 | 0.842           | 0.274 | 0.782 | 0.299 |
| <b>Frankfurt Ost</b>     |                |       |                 |       |       |       |
| RACM                     | 0.950          | 0.054 | 0.868           | 0.325 | 0.956 | 0.559 |
| URMELL                   | 0.972          | 0.037 | 0.925           | 0.342 | 0.940 | 0.589 |
| <b>Neubrandenburg</b>    |                |       |                 |       |       |       |
| RACM                     | 0.948          | 0.075 | 0.158           | 0.697 |       |       |
| URMELL                   | 0.960          | 0.076 | 0.189           | 0.699 |       |       |
| <b>Soest</b>             |                |       |                 |       |       |       |
| RACM                     | 0.959          | 0.064 | 0.852           | 0.196 |       |       |
| URMELL                   | 0.959          | 0.070 | 0.866           | 0.188 |       |       |
| <b>Trier</b>             |                |       |                 |       |       |       |
| RACM                     | 0.980          | 0.163 | 0.796           | 0.359 |       |       |
| URMELL                   | 0.989          | 0.170 | 0.828           | 0.364 |       |       |
| <b>Cologne</b>           |                |       |                 |       |       |       |
| RACM                     | 0.917          | 0.100 | 0.821           | 0.141 | 0.971 | 0.263 |
| URMELL                   | 0.946          | 0.086 | 0.847           | 0.120 | 0.948 | 0.281 |
| <b>Frankfurt Hoechst</b> |                |       |                 |       |       |       |
| RACM                     | 0.953          | 0.047 | 0.941           | 0.362 | 0.932 | 0.682 |
| URMELL                   | 0.960          | 0.048 | 0.948           | 0.370 | 0.917 | 0.691 |

| Measurement sites     | O <sub>3</sub> |       | NO <sub>2</sub> |       | NO    |       |
|-----------------------|----------------|-------|-----------------|-------|-------|-------|
|                       | R              | COD   | R               | COD   | R     | COD   |
| <b>Riedstadt</b>      |                |       |                 |       |       |       |
| RACM                  | 0.924          | 0.092 | 0.588           | 0.180 |       |       |
| URMELL                | 0.937          | 0.079 | 0.654           | 0.154 |       |       |
| <b>Hamburg</b>        |                |       |                 |       |       |       |
| RACM                  | 0.969          | 0.076 |                 |       |       |       |
| URMELL                | 0.965          | 0.075 |                 |       |       |       |
| <b>Koblenz</b>        |                |       |                 |       |       |       |
| RACM                  | 0.940          | 0.102 | 0.510           | 0.441 |       |       |
| URMELL                | 0.962          | 0.106 | 0.581           | 0.454 |       |       |
| <b>Berlin Wedding</b> |                |       |                 |       |       |       |
| RACM                  | 0.964          | 0.039 | 0.811           | 0.209 | 0.791 | 0.352 |
| URMELL                | 0.973          | 0.039 | 0.780           | 0.220 | 0.797 | 0.389 |
| <b>Duisburg</b>       |                |       |                 |       |       |       |
| RACM                  | 0.970          | 0.070 | 0.905           | 0.074 |       |       |
| URMELL                | 0.968          | 0.068 | 0.908           | 0.075 |       |       |
| <b>Bottrop</b>        |                |       |                 |       |       |       |
| RACM                  | 0.955          | 0.077 | 0.903           | 0.063 |       |       |
| URMELL                | 0.957          | 0.084 | 0.933           | 0.053 |       |       |
| <b>Saarbruecken</b>   |                |       |                 |       |       |       |
| RACM                  | 0.966          | 0.223 | 0.229           | 0.776 | 0.737 | 0.978 |
| URMELL                | 0.968          | 0.240 | 0.213           | 0.778 | 0.724 | 0.976 |
| <b>Karlsruhe</b>      |                |       |                 |       |       |       |
| RACM                  | 0.971          | 0.078 | 0.947           | 0.130 | 0.899 | 0.410 |
| URMELL                | 0.988          | 0.058 | 0.906           | 0.167 | 0.800 | 0.441 |
| <b>Zartau</b>         |                |       |                 |       |       |       |
| RACM                  | 0.987          | 0.042 | 0.928           | 0.132 |       |       |
| URMELL                | 0.983          | 0.042 | 0.935           | 0.129 |       |       |
| <b>Schwedt</b>        |                |       |                 |       |       |       |
| RACM                  | 0.993          | 0.027 |                 |       |       |       |
| URMELL                | 0.983          | 0.033 |                 |       |       |       |
| <b>Schwartenberg</b>  |                |       |                 |       |       |       |
| RACM                  | 0.804          | 0.110 |                 |       |       |       |
| URMELL                | 0.857          | 0.113 |                 |       |       |       |
| <b>Bremen</b>         |                |       |                 |       |       |       |
| RACM                  | 0.976          | 0.074 | 0.516           | 0.433 |       |       |
| URMELL                | 0.973          | 0.072 | 0.455           | 0.424 |       |       |
| <b>Westerland</b>     |                |       |                 |       |       |       |
| RACM                  | 0.984          | 0.046 | 0.411           | 0.147 | 0.831 | 0.636 |
| URMELL                | 0.978          | 0.051 | 0.354           | 0.134 | 0.833 | 0.623 |
| <b>Schmuecke</b>      |                |       |                 |       |       |       |
| RACM                  | 0.755          | 0.088 | 0.571           | 0.136 | 0.805 | 0.258 |
| URMELL                | 0.844          | 0.089 | 0.507           | 0.137 | 0.805 | 0.275 |

| Measurement sites | O <sub>3</sub> |       | NO <sub>2</sub> |       | NO |     |
|-------------------|----------------|-------|-----------------|-------|----|-----|
|                   | R              | COD   | R               | COD   | R  | COD |
| <b>Zinnwald</b>   |                |       |                 |       |    |     |
| RACM              | 0.912          | 0.114 | 0.108           | 0.342 |    |     |
| URMELL            | 0.943          | 0.115 | 0.097           | 0.306 |    |     |
| <b>Radebeul</b>   |                |       |                 |       |    |     |
| RACM              | 0.968          | 0.085 |                 |       |    |     |
| URMELL            | 0.980          | 0.078 |                 |       |    |     |

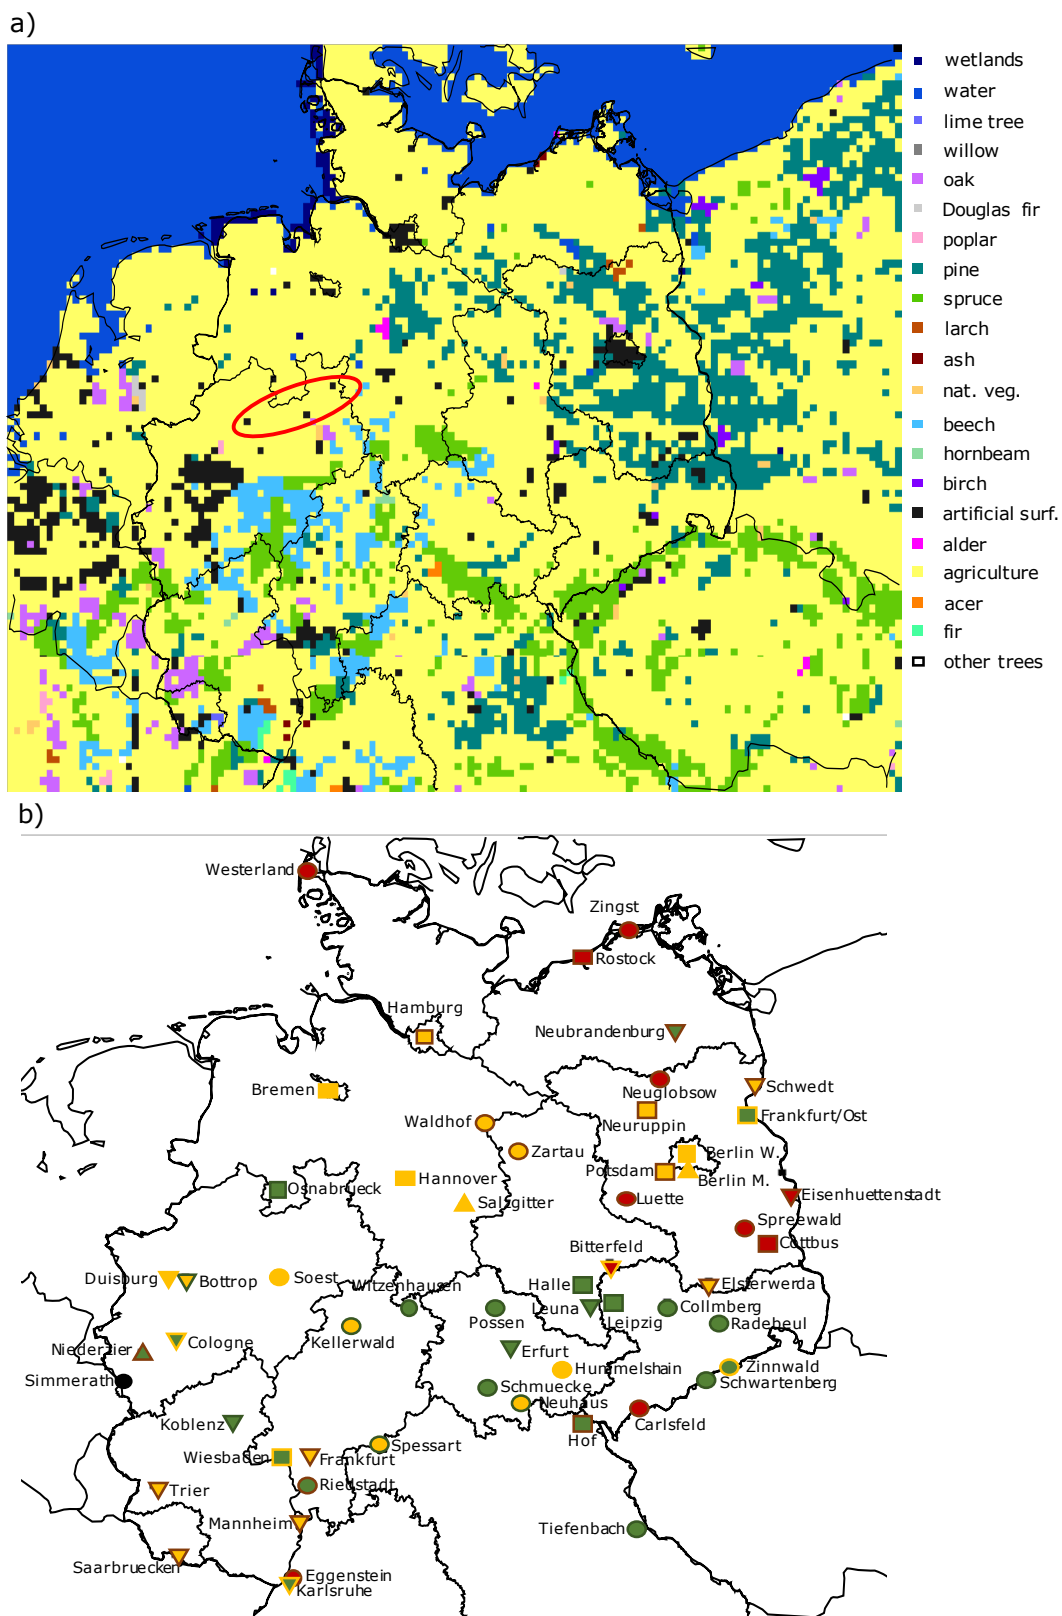

**Fig. S3-1:** Distribution of the dominant land use type left with red marked area indicating an isoprene-dominated area and b) the selected measurement sites with indication for better ozone correlation values in green for URMELL, red for RACM and yellow if correlation  $R_{RACM} - R_{URMELL}$  values are within 0.01 for the entire time series (edge color) and the mean daily concentration cycles (fill color) right. Circles mark the remote background, squares the urban background, triangles traffic/industrial impacted sites.

## S3.2 Additional information about remote sites

### S3.2.1 BVOC emissions

Table S3.2-1 the BVOC emission parameters of the four common German tree species. Beech (*Fagus sylvatica*) has neither isoprene nor monoterpene pool emissions but releases high amounts of synthesis monoterpenes and OVOCs. Therefore, no isoprene and monoterpene nighttime emission occur for beech. Oak species are the dominant isoprene emitters in Germany (in the case of Simmeranth *Quercus petraea*) with only minor contributions to pool monoterpenes and moderate OVOC emissions. Spruce (*Picea abies*) have moderate isoprene and pool monoterpene but higher synthesis monoterpene and OVOC emissions. Pine trees (*Pinus sylvestris*) do not emit isoprene but higher amounts of pool and synthesis monoterpenes. Therefore, the tree species composition at the measurement site impacts the BVOC mixture which affects the O<sub>3</sub> concentration.

**Table S3.2-1** Summary of the standard emission factors for isoprene, monoterpene and OVOCs of the four dominant tree species

| Tree species            | Isoprene in $\mu\text{g m}^{-2} \text{h}^{-1}$<br>(PAR & T) | Monoterpenes in $\mu\text{g m}^{-2} \text{h}^{-1}$ |         | OVOCs in $\mu\text{g m}^{-2} \text{h}^{-1}$<br>(T) |
|-------------------------|-------------------------------------------------------------|----------------------------------------------------|---------|----------------------------------------------------|
|                         |                                                             | MTS (PAR & T)                                      | MTP (T) |                                                    |
| <i>Fagus sylvatica</i>  | 0.0                                                         | 7208.74                                            | 0.0     | 3410.0                                             |
| <i>Quercus petraea</i>  | 14400.0                                                     | 0.0                                                | 96.0    | 640.0                                              |
| <i>Picea abies</i>      | 1600.0                                                      | 3360.0                                             | 640.0   | 3680.0                                             |
| <i>Pinus sylvestris</i> | 0.0                                                         | 1750.0                                             | 1750.0  | 1400.0                                             |

Fig. S3.2-1–S3.2-4 show the time series as well as the average daily profiles for the four selected sites. Additional time series of BVOC and OH concentrations are presented in Fig S3.2-2 to S3.2-8. Spreewald is a monoterpene dominated site with only little isoprene contribution (Fig. S3.3-5). Therefore, isoprene chemistry only plays a minor role there. Especially during night, the continuous monoterpene emissions significantly deplete O<sub>3</sub> resulting in a more pronounced daily cycle compared to the diminished cycles at the other three locations. For Spreewald, night time concentrations are nearly matched, while the daytime O<sub>3</sub> peak is under predicted for both simulations. But, the slower O<sub>3</sub> night-time decay causes a slightly lower correlation value for pine. This also transfers to urban environments within low isoprene concentration areas and applies to most of the red marked sites in the east as well as Eggenstein at the south west of the domain in Fig. S3-1b. For Schmuecke (Fig. S3.2-8) and Kellerwald (Fig. S3.2-6), monoterpenes are still dominating, but with much higher portions of synthesis emissions. Furthermore, isoprene and OVOCs become more

important for both sites. Here,  $O_3$  declines after 15 UTC, but this  $O_3$  reduction stagnates or even slightly increases again for a short time between 20 UTC and roughly 2 UTC when  $NO_3$  oxidation becomes sufficient. Afterwards  $O_3$  decreases again to a minimum around 6 UTC. Compared to Kellerwald and Schmuecke, Simmerath does not show so strong night time ozone depletion due to lacking night time BVOC emissions (low monoterpene and isoprene concentration in Fig. S3.2-7), therefore no clear reduction in ozone concentration between 3 and 6 UTC is visible. For Kellerwald and Simmerath, the diurnal  $O_3$  cycle and concentrations are similar compared to the measurements. But, there is a significant offset between the modeled and measured  $O_3$  concentration for Schmuecke of yet unknown cause.

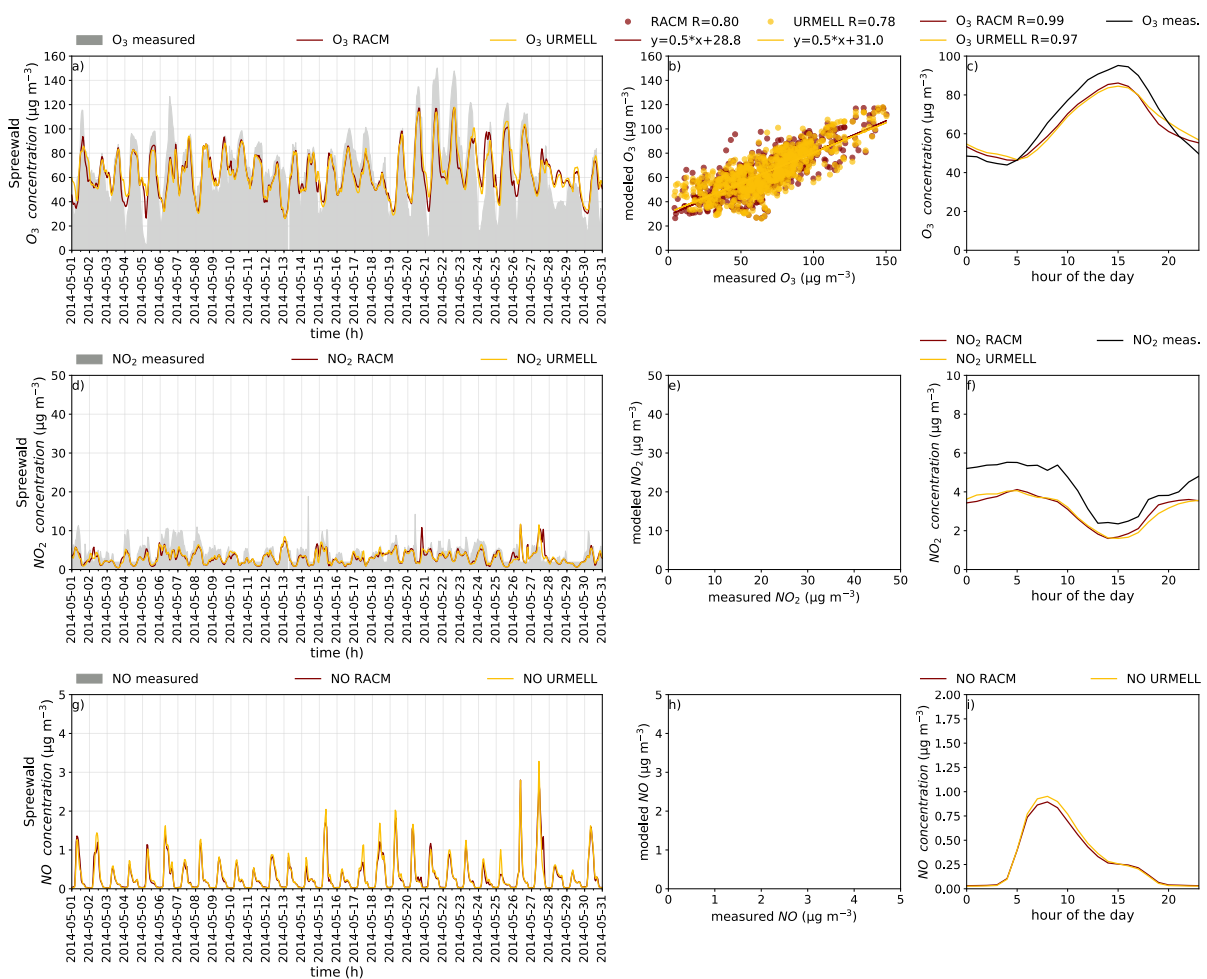

**Fig. S3.2-1:** Time series of  $O_3$  in a), b) and c); of  $NO_2$  in d), e) and f); of  $NO$  in g) h) and i) for Spreewald (pine) measurements in grey for a), d) and g) black line otherwise as well as modeled concentrations using RACM (red line) and URMELL (yellow line).



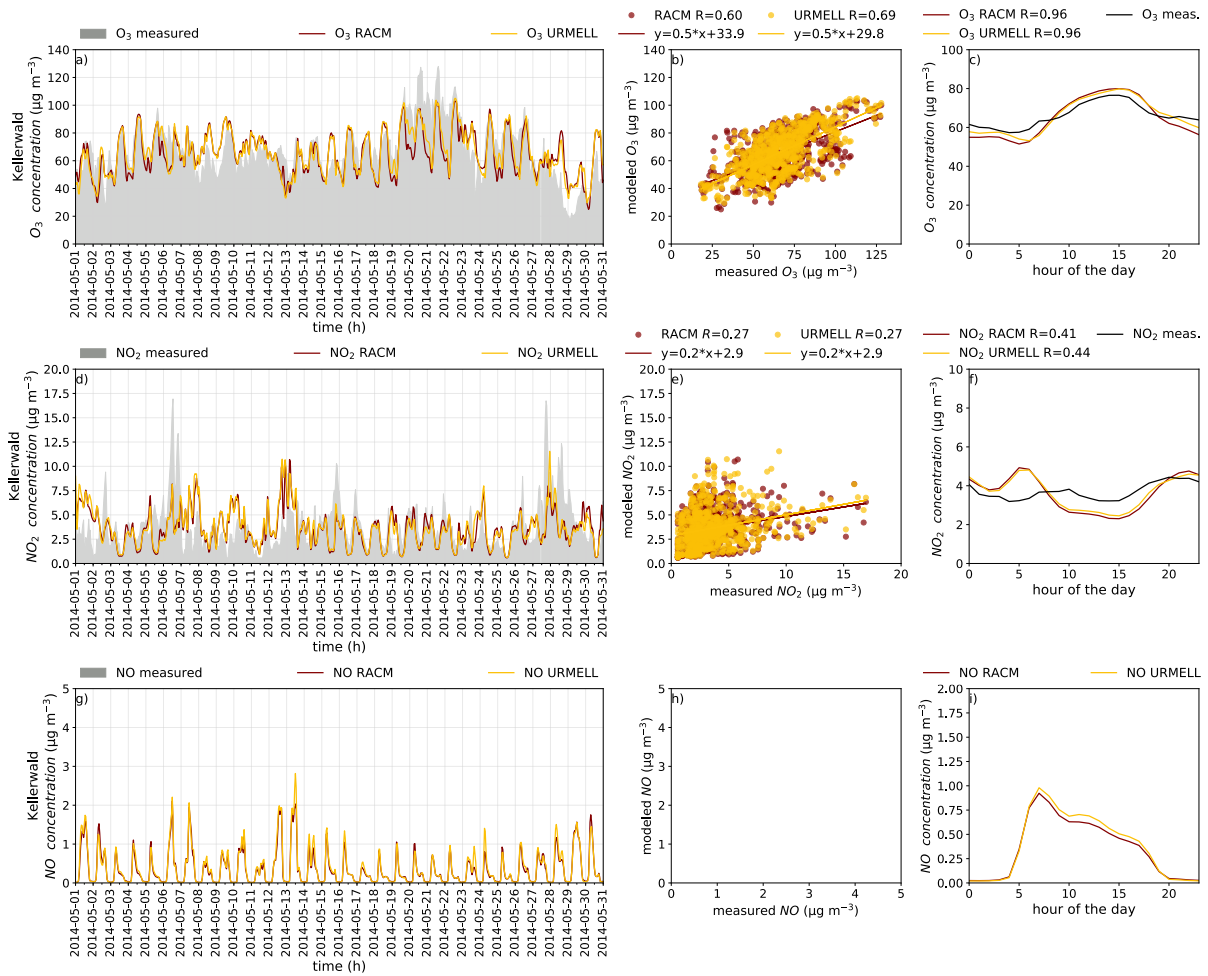

**Fig. S3.2-2:** Time series of O<sub>3</sub> in a), b) and c); of NO<sub>2</sub> in d), e) and f); of NO in g) h) and i) for Kellerwald (beech) measurements in grey for a), d) and g) black line otherwise as well as modeled concentrations using RACM (red line) and URMELL (yellow line).

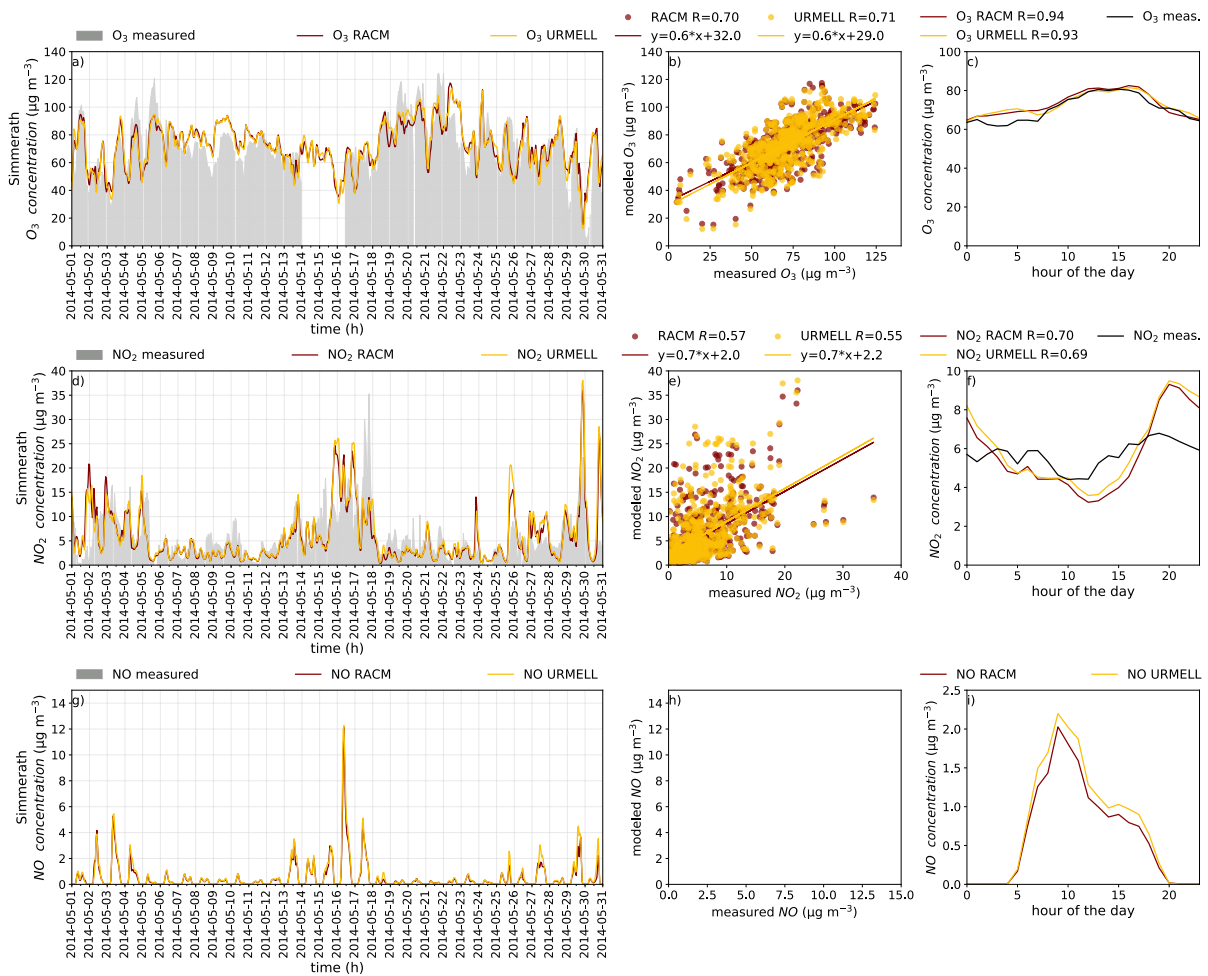

**Fig. S3.2-3:** Time series of O<sub>3</sub> in a), b) and c); of NO<sub>2</sub> in d), e) and f); of NO in g) h) and i) for Simmerath (oak) measurements in grey for a), d) and g) black line otherwise as well as modeled concentrations using RACM (red line) and URMELL (yellow line).

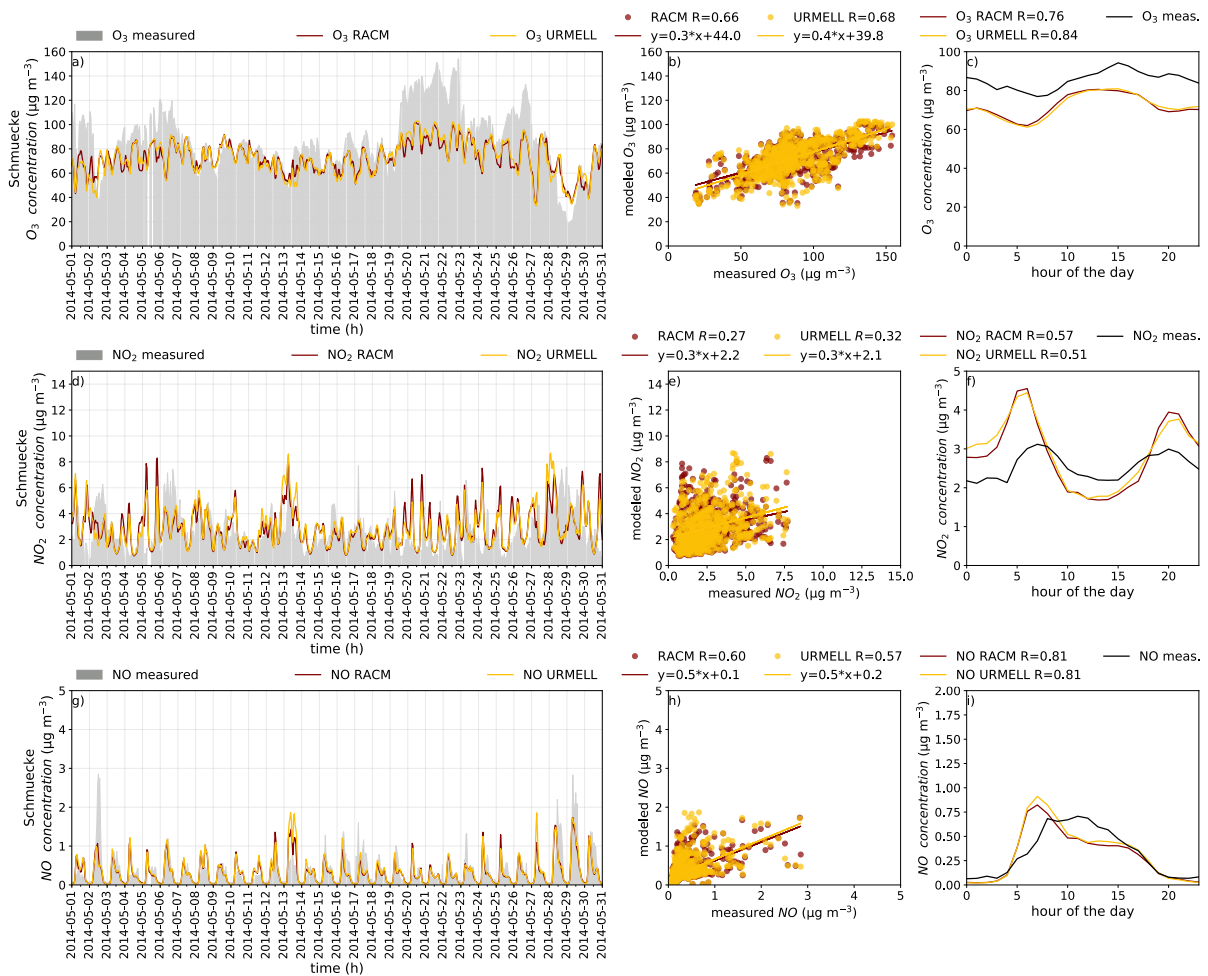

**Fig. S3.2-4:** Time series of O<sub>3</sub> in a), b) and c); of NO<sub>2</sub> in d), e) and f); of NO in g) h) and i) for Schmuecke (spruce) measurements in grey for a), d) and g) black line otherwise as well as modeled concentrations using RACM (red line) and URMELL (yellow line).

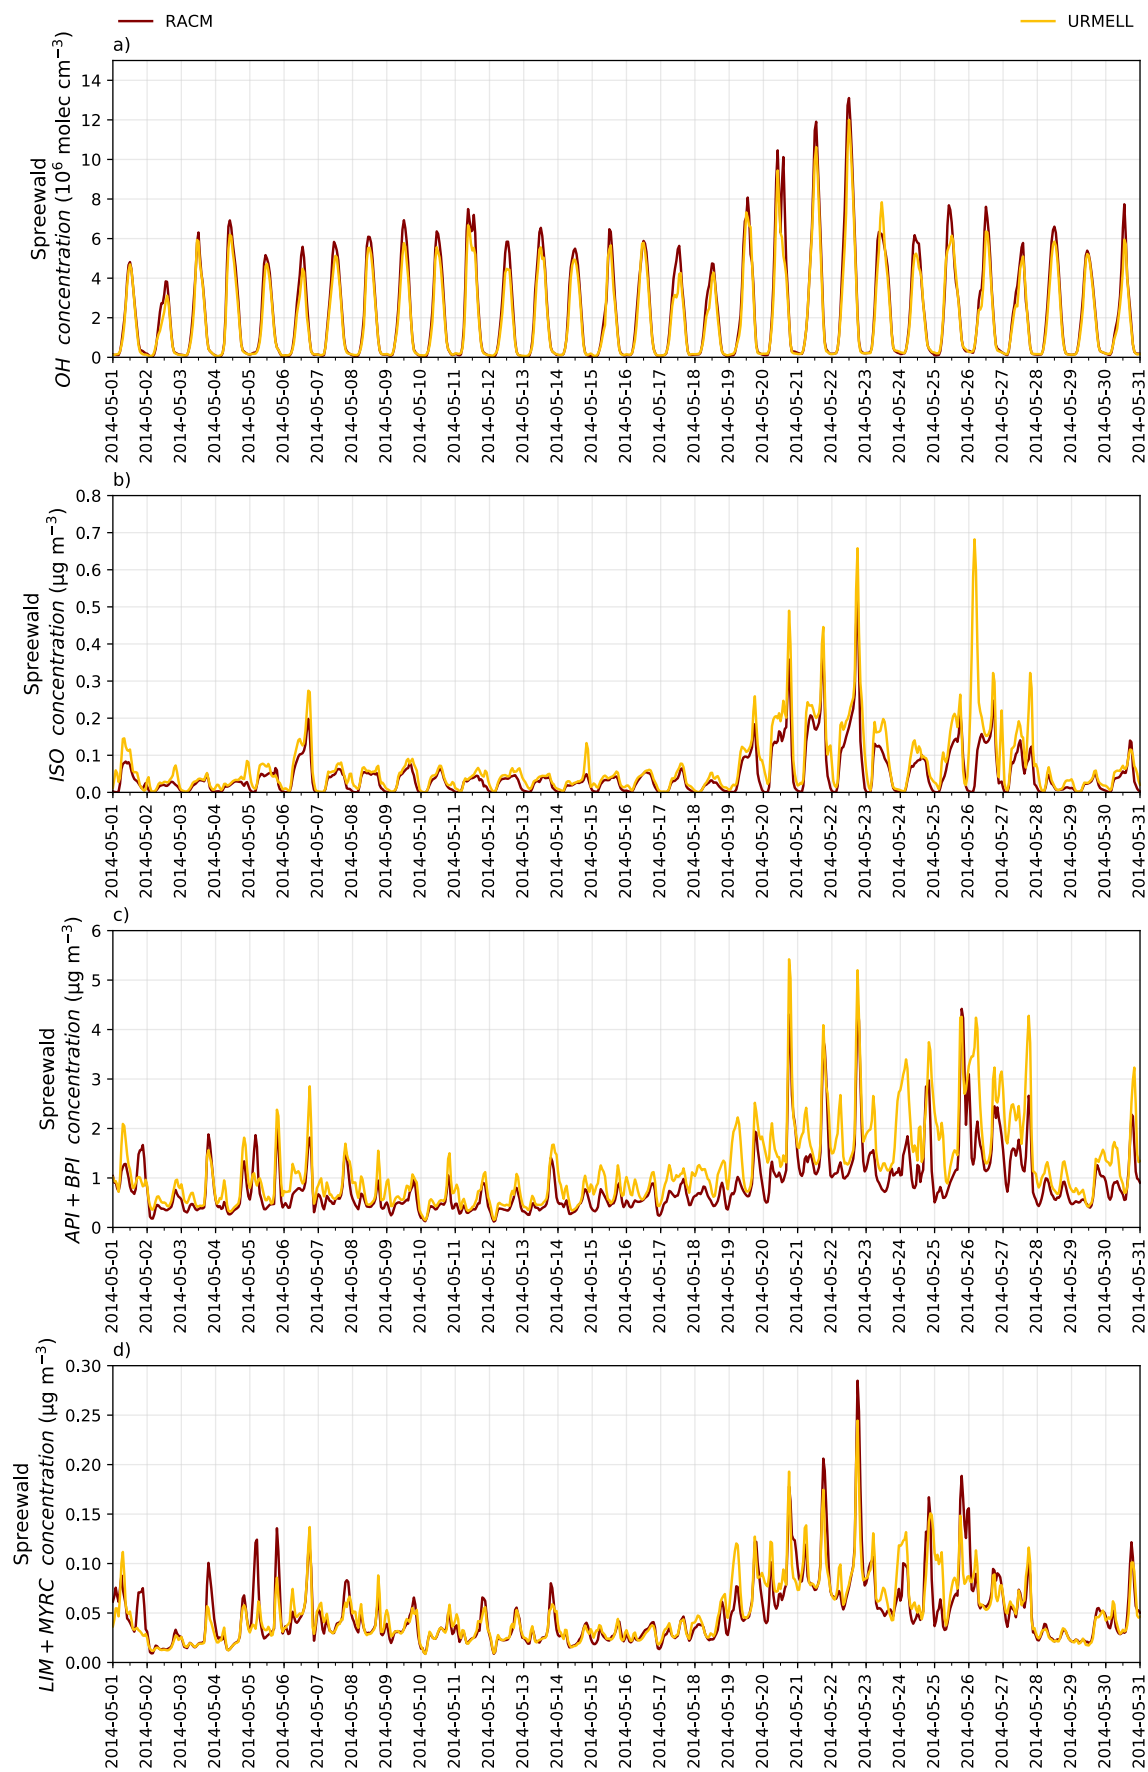

**Fig. S3.2-5:** Time series of modeled OH in a), isoprene in b),  $\alpha$ - and  $\beta$ -pinene in c), limonene and myrcene in d) for Spreewald (pine) using RACM (red line) and URMELL (yellow line).

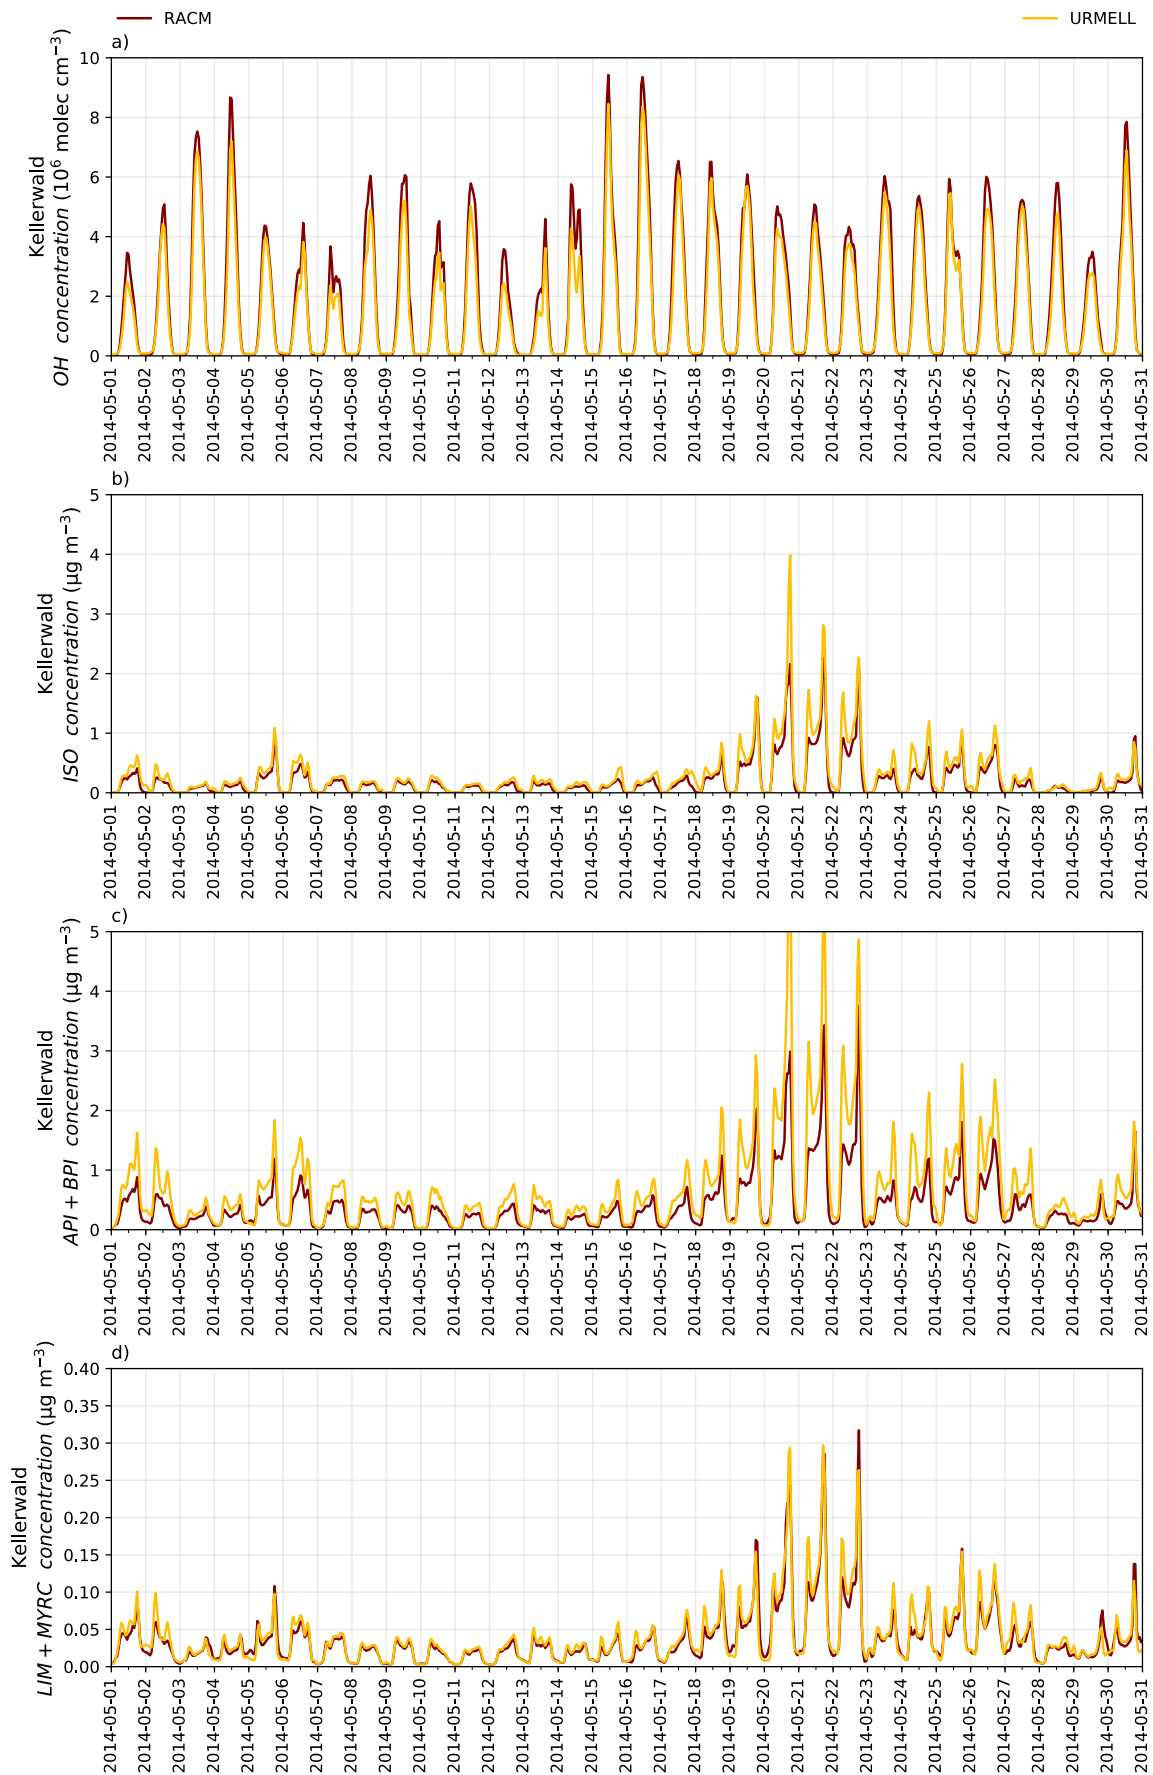

**Fig. S3.2-6:** Time series of modeled OH in a), isoprene in b),  $\alpha$ - and  $\beta$ -pinene in c), limonene and myrcene in d) for Kellerwald (beech) using RACM (red line) and URMELL (yellow line).

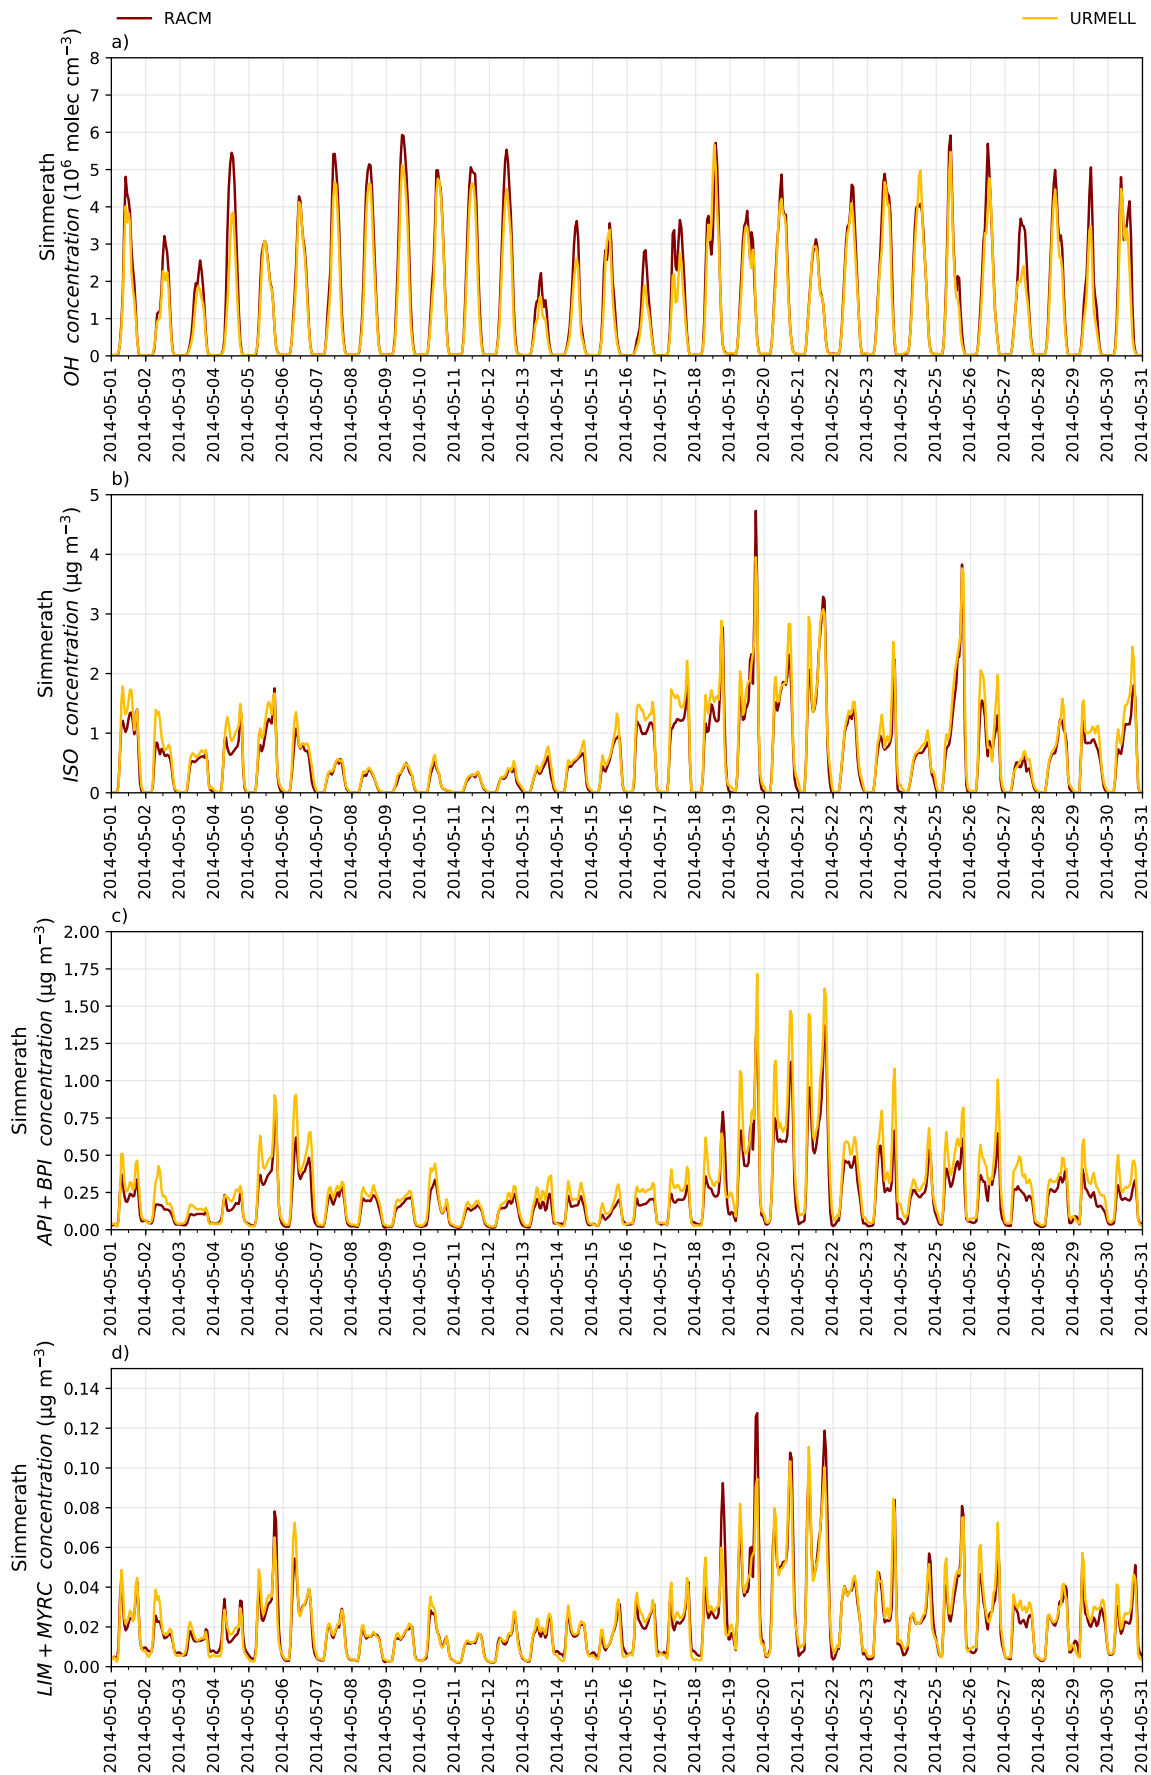

**Fig. S3.2-7:** Time series of modeled OH in a), isoprene in b),  $\alpha$ - and  $\beta$ -pinene in c), limonene and myrcene in d) for Simmerath (oak) using RACM (red line) and URMELL (yellow line).

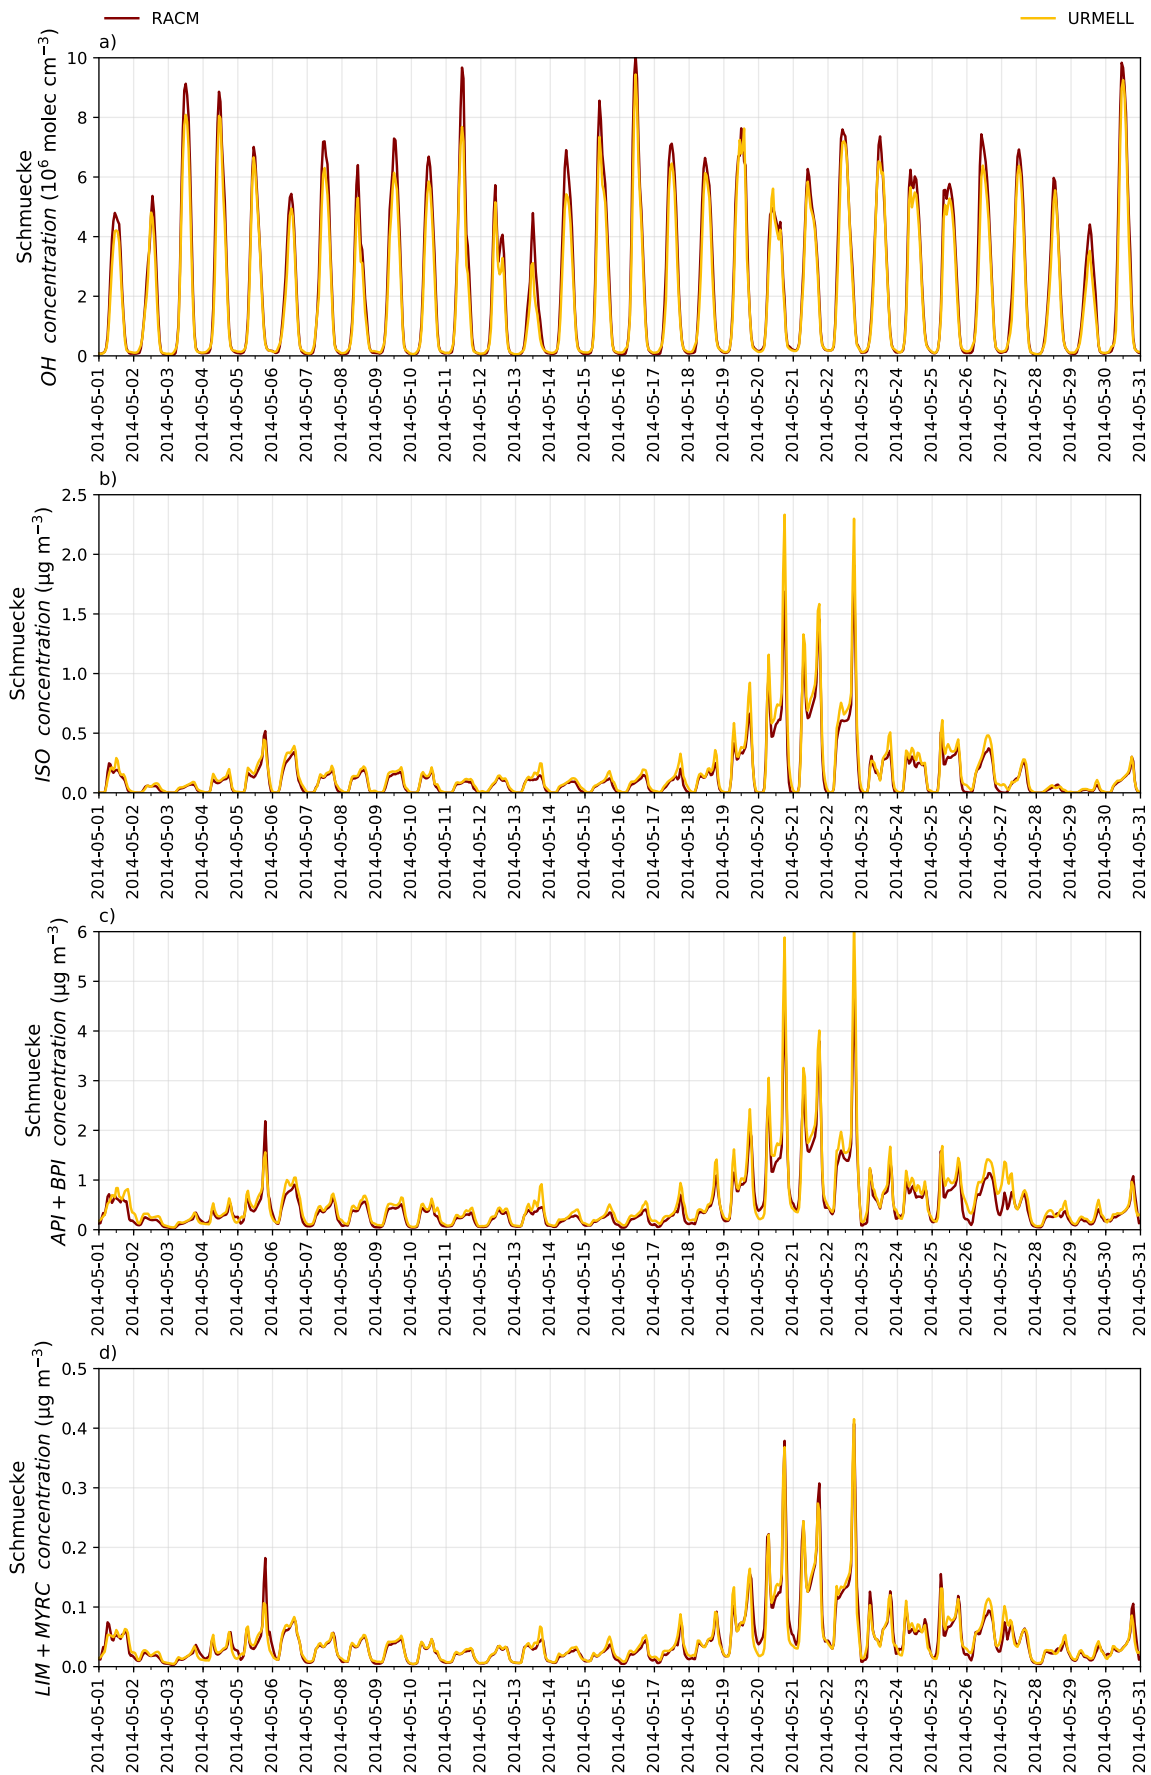

**Fig. S3.2-8:** Time series of modeled OH in a), isoprene in b),  $\alpha$ - and  $\beta$ -pinene in c), limonene and myrcene in d) for Schmuecke (spruce) using RACM (red line) and URMELL (yellow line).

## Supplement S4 – CTM simulations

For the model comparison also map plots of  $\text{NO}_2$ , OH, monoterpene and isoprene concentrations are provided for the 20<sup>th</sup> of May 2014 for 3, 13 and 19 UTC using RACM and URMELL. Also included is the difference between RACM and URMELL.

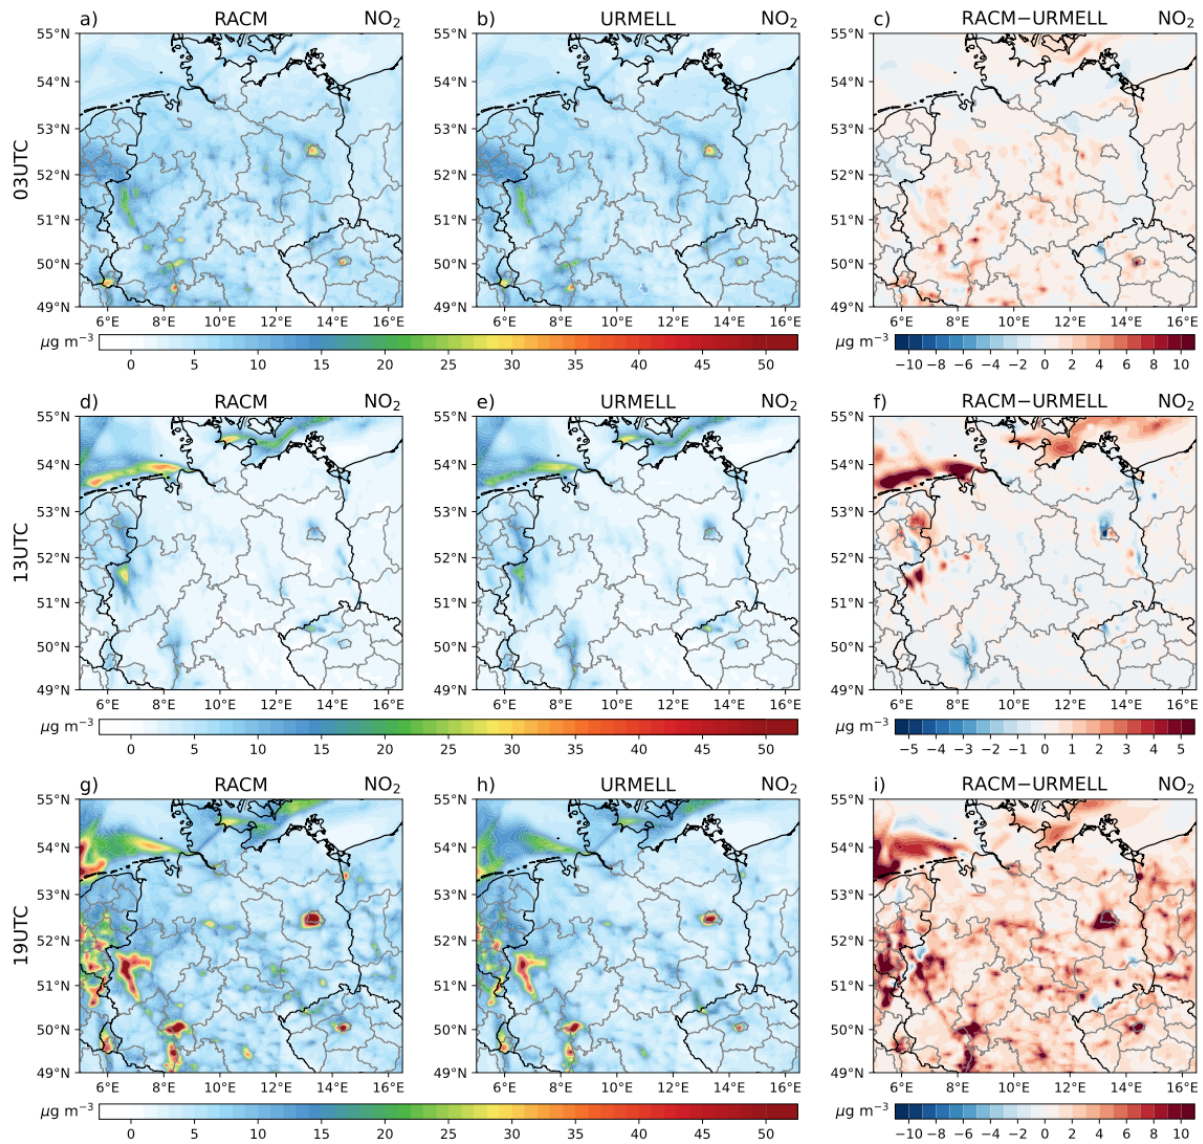

**Fig. S4-1:**  $\text{NO}_2$  concentration for the 20th of May 2014 at 3 UTC, 13 UTC and 19 UTC for RACM (left), URMELL (middle) and the difference between RACM and URMEL (right).



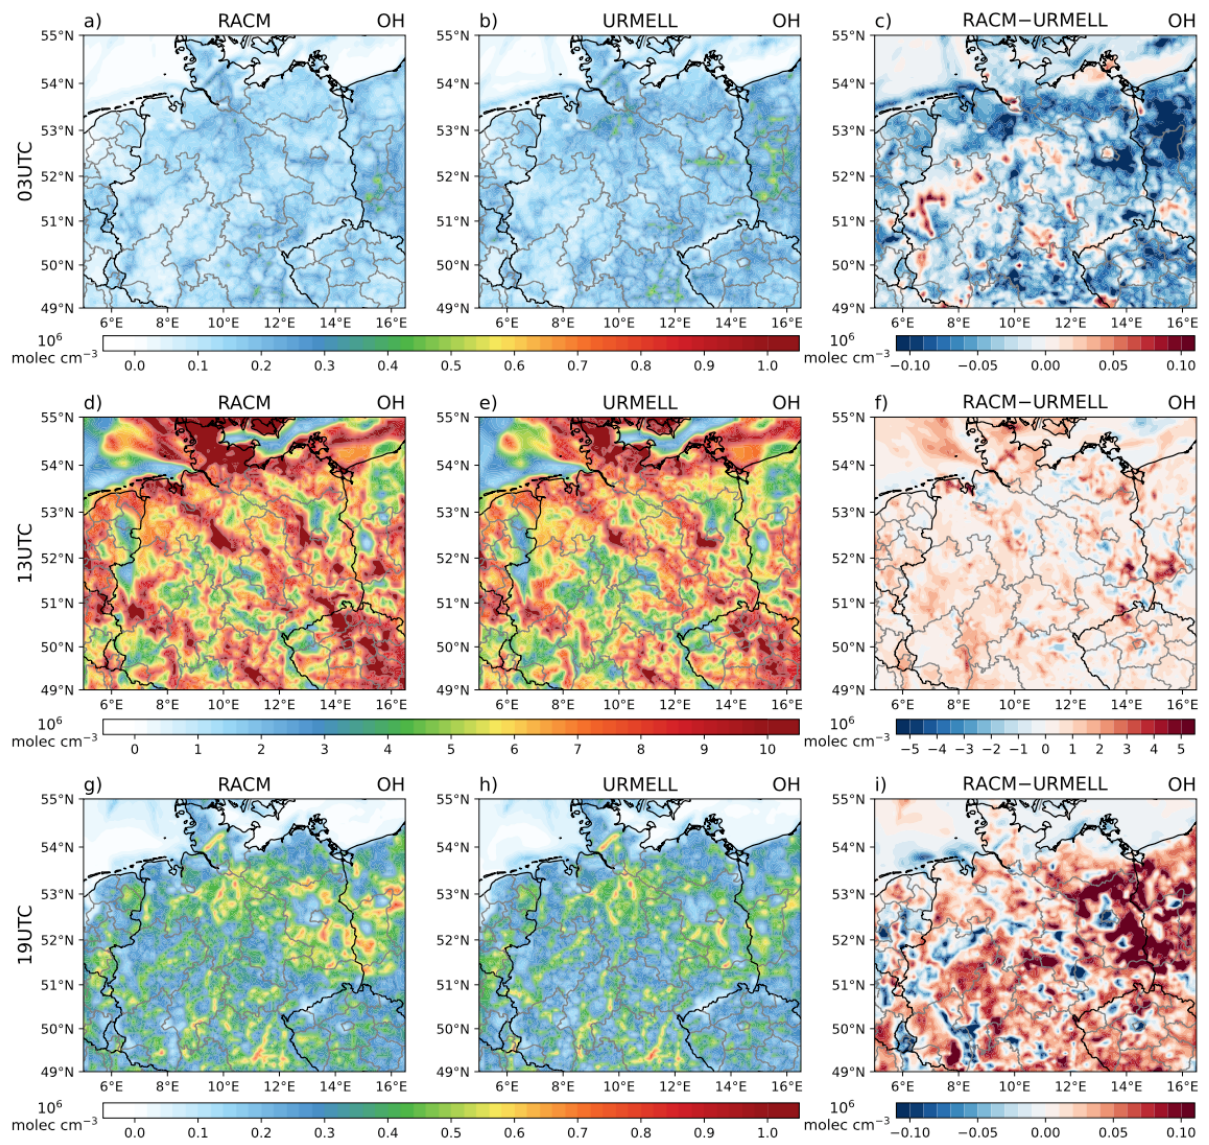

**Fig. S4-2:** OH concentration for the 20th of May 2014 at 3 UTC, 13 UTC and 19 UTC for RACM (left), URMELL (middle) and the difference between RACM and URMEL (right).

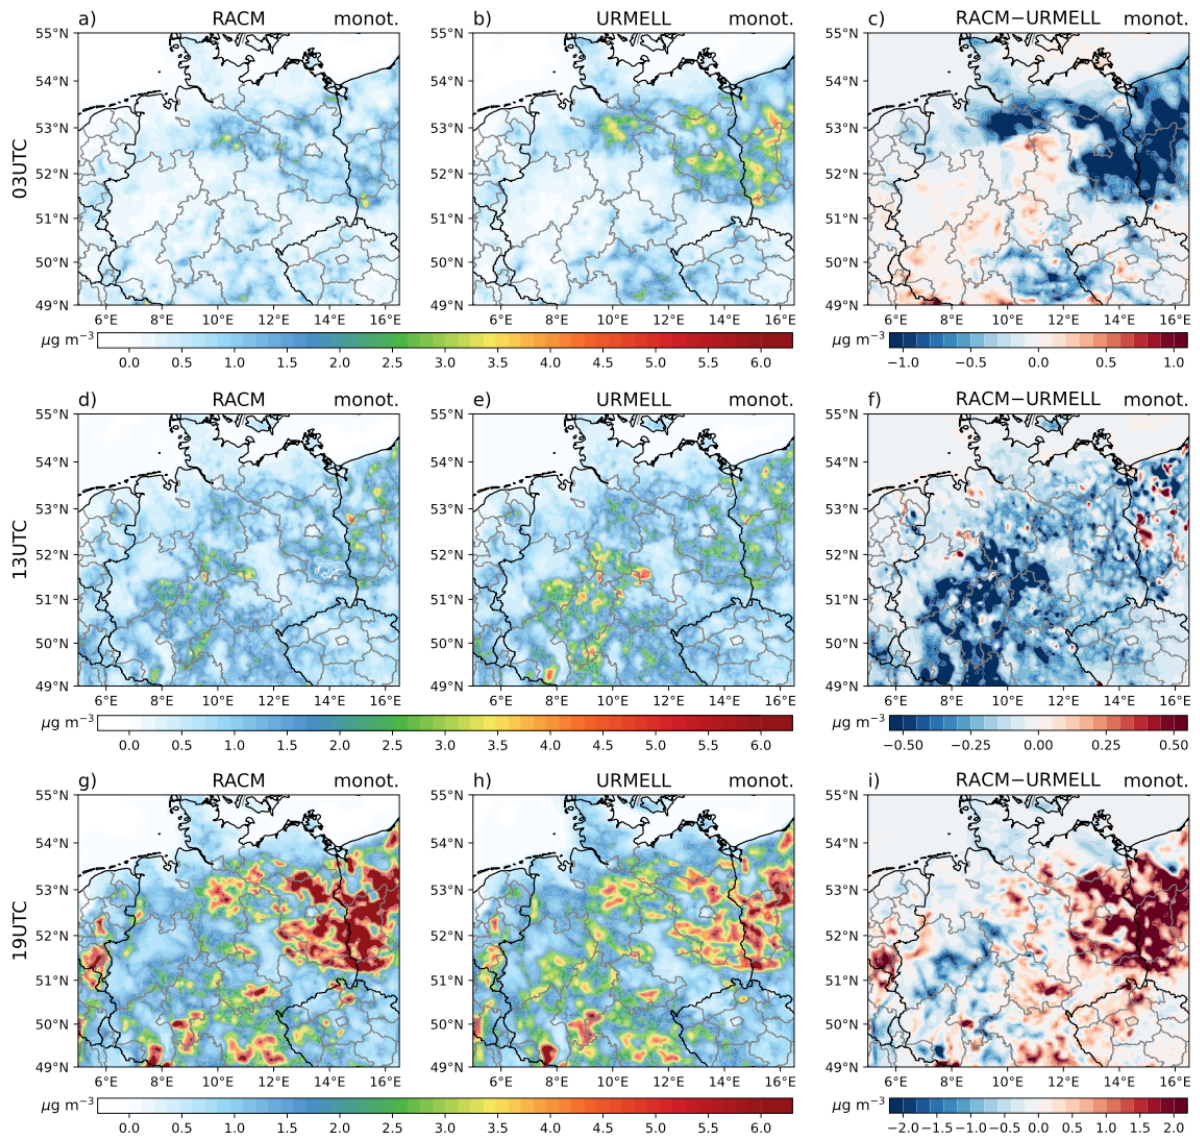

**Fig. S4-3:** Monoterpene concentration for the 20th of May 2014 at 3 UTC, 13 UTC and 19 UTC for RACM (left), URMELL (middle) and the difference between RACM and URMEL (right).

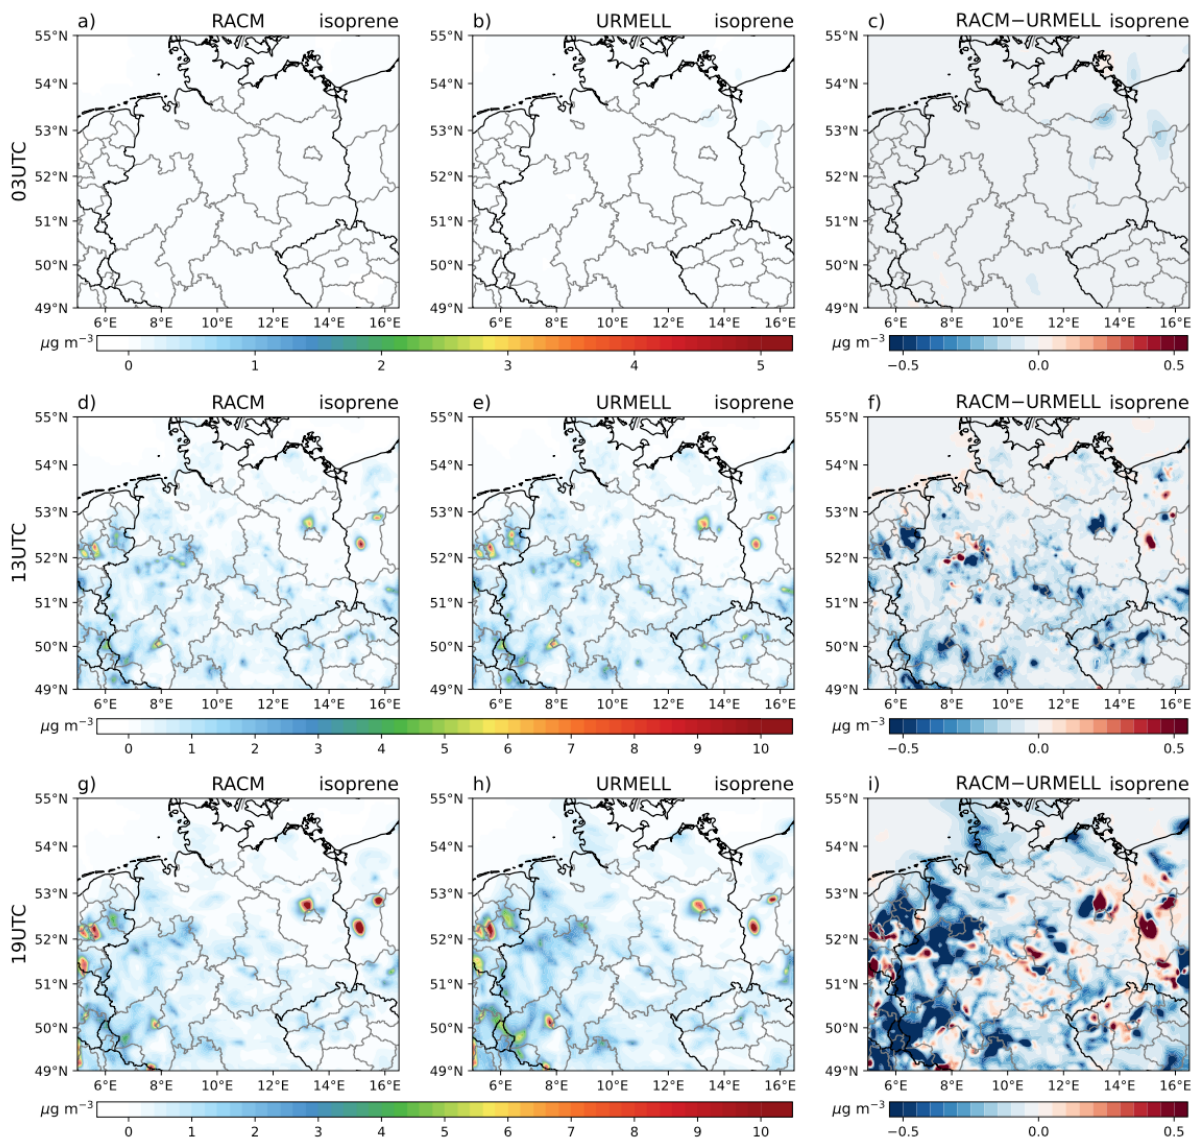

**Fig. S4-4:** Isoprene concentration for the 20th of May 2014 at 3 UTC, 13 UTC and 19 UTC for RACM (left), URMELL (middle) and the difference between RACM and URMEL (right).

## References

- 1 P. O. Wennberg, K. H. Bates, J. D. Crouse, L. G. Dodson, R. C. McVay, L. A. Mertens, T. B. Nguyen, E. Praske, R. H. Schwantes, M. D. Smarte, J. M. St Clair, A. P. Teng, X. Zhang and J. H. Seinfeld, Gas-Phase Reactions of Isoprene and Its Major Oxidation Products, *Chem. Rev.*, 2018, **118**, 3337–3390.
- 2 L. Vereecken, P. T. M. Carlsson, A. Novelli, F. Bernard, S. S. Brown, C. Cho, J. N. Crowley, H. Fuchs, W. Mellouki, D. Reimer, J. Shenolikar, R. Tillmann, L. Zhou, A. Kiendler-Scharr and A. Wahner, Theoretical and experimental study of peroxy and alkoxy radicals in the NO<sub>3</sub>-initiated oxidation of isoprene, *Phys. Chem. Chem. Phys.*, 2021, **23**, 5496–5515.
- 3 M. G. Schultz, S. Stadtler, S. Schröder, D. Taraborrelli, B. Franco, J. Krefting, A. Henrot, S. Ferrachat, U. Lohmann, D. Neubauer, C. Siegenthaler-Le Drian, S. Wahl, H. Kokkola, T. Kühn, S. Rast, H. Schmidt, P. Stier, D. Kinnison, G. S. Tyndall, J. J. Orlando and C. Wespes, The chemistry–climate model ECHAM6.3-HAM2.3-MOZ1.0, *Geosci. Model Dev.*, 2018, **11**, 1695–1723.
- 4 L. Chen, Y. Huang, Y. Xue, Z. Jia and W. Wang, *OH-Initiated Atmospheric Degradation of Hydroxyalkyl Hydroperoxides: Mechanism, Kinetics, and Structure-Activity Relationship*, Aerosols/Atmospheric Modelling/Troposphere/Chemistry (chemical composition and reactions), 2021.
- 5 R. A. Cox, M. Ammann, J. N. Crowley, H. Herrmann, M. E. Jenkin, V. F. McNeill, A. Mellouki, J. Troe and T. J. Wallington, Evaluated kinetic and photochemical data for atmospheric chemistry: Volume VII – Criegee intermediates, *Atmos. Chem. Phys.*, 2020, **20**, 13497–13519.
- 6 M. E. Jenkin, R. Valorso, B. Aumont and A. R. Rickard, Estimation of rate coefficients and branching ratios for reactions of organic peroxy radicals for use in automated mechanism construction, *Atmos. Chem. Phys.*, 2019, **19**, 7691–7717.
- 7 L. Sheps, B. Rotavera, A. J. Eskola, D. L. Osborn, C. A. Taatjes, K. Au, D. E. Shallcross, M. A. H. Khan and C. J. Percival, The reaction of Criegee intermediate CH<sub>2</sub>OO with water dimer: primary products and atmospheric impact, *Phys. Chem. Chem. Phys.*, 2017, **19**, 21970–21979.
- 8 A. P. Teng, J. D. Crouse and P. O. Wennberg, Isoprene Peroxy Radical Dynamics, *J. Am. Chem. Soc.*, 2017, **139**, 5367–5377.
- 9 J.-F. Müller, T. Stavroukou and J. Peeters, Chemistry and deposition in the Model of Atmospheric composition at Global and Regional scales using Inversion Techniques for Trace gas Emissions (MAGRITTE v1.1) – Part 1: Chemical mechanism, *Geosci. Model Dev.*, 2019, **12**, 2307–2356.
- 10 M. E. Jenkin, R. Valorso, B. Aumont, A. R. Rickard and T. J. Wallington, Estimation of rate coefficients and branching ratios for gas-phase reactions of OH with aromatic organic compounds for use in automated mechanism construction, *Atmos. Chem. Phys.*, 2018, **18**, 9329–9349.
- 11 M. A. H. Khan, M. E. Jenkin, A. Foulds, R. G. Derwent, C. J. Percival and D. E. Shallcross, A modeling study of secondary organic aerosol formation from sesquiterpenes using the STOCHEM global chemistry and transport model: SOA FORMATION FROM SESQUITERPENES, *J. Geophys. Res. Atmos.*, 2017, **122**, 4426–4439.
- 12 M. E. Jenkin, R. Valorso, B. Aumont, A. R. Rickard and T. J. Wallington, Estimation of rate coefficients and branching ratios for gas-phase reactions of OH with aliphatic organic compounds for use in automated mechanism construction, *Atmos. Chem. Phys.*, 2018, **18**, 9297–9328.
- 13 K. H. Bates, D. J. Jacob, K. Li, P. D. Ivatt, M. J. Evans, Y. Yan and J. Lin, Development and evaluation of a new compact mechanism for aromatic oxidation in atmospheric models, *Atmos. Chem. Phys.*, 2021, **21**, 18351–18374.
- 14 T. B. Nguyen, G. S. Tyndall, J. D. Crouse, A. P. Teng, K. H. Bates, R. H. Schwantes, M. M. Coggon, L. Zhang, P. Feiner, D. O. Miller, K. M. Skog, J. C. Rivera-Rios, M. Dorris, K. F. Olson, A. Koss, R. J. Wild, S. S. Brown, A. H. Goldstein, J. A. de Gouw, W. H. Brune, F. N. Keutsch, J. H. Seinfeld and P. O. Wennberg, Atmospheric fates of Criegee intermediates in the ozonolysis of isoprene, *Phys. Chem. Chem. Phys.*, 2016, **18**, 10241–10254.
- 15 B. Yuan, P. R. Veres, C. Warneke, J. M. Roberts, J. B. Gilman, A. Koss, P. M. Edwards, M. Graus, W. C. Kuster, S.-M. Li, R. J. Wild, S. S. Brown, W. P. Dubé, B. M. Lerner, E. J. Williams, J. E. Johnson, P. K. Quinn, T. S. Bates, B. Lefer, P. L. Hayes, J. L. Jimenez, R. J. Weber, R. Zamora, B. Ervens, D. B. Millet, B. Rappenglück and J. A. de Gouw, Investigation of secondary formation of formic acid: urban environment vs. oil and gas producing region, *Atmospheric Chemistry and Physics*, 2015, **15**, 1975–1993.
- 16 D. B. Millet, M. Baasandorj, D. K. Farmer, J. A. Thornton, K. Baumann, P. Brophy, S. Chaliyakunnel, J. A. de Gouw, M. Graus, L. Hu, A. Koss, B. H. Lee, F. D. Lopez-Hilfiker, J. A. Neuman, F. Paulot, J. Peischl, I. B. Pollack, T. B. Ryerson, C. Warneke, B. J. Williams and J. Xu, A large and ubiquitous source of atmospheric formic acid, *Atmos. Chem. Phys.*, 2015, **15**, 6283–6304.
